# Supplementary material for: Risk Factors for Premature Myocardial Infarction: A Systematic Review and Meta-analysis of 77 Studies
Source: PubMed Central journal article supplement — Mayo Clin Proc Innov Qual Outcomes. 2021 Jun 23;5(4):783–94. doi: 10.1016/j.mayocpiqo.2021.03.009 (PMC8358212; doi:10.1016/j.mayocpiqo.2021.03.009), 2021-06-23
Supplement: mmc1.pdf [file mmc1.pdf]

## **SUPPLEMENTAL MATERIAL**

*Dugani et al., Risk factors for premature myocardial infarction: A systematic review and meta-analysis of 77 studies*

## Online Supplemental Material

| File number            | File name                                                                                | Page number |
|------------------------|------------------------------------------------------------------------------------------|-------------|
| Supplemental Table 1   | PRISMA checklist                                                                         | 3           |
| Supplemental Table 2   | Search strategy                                                                          | 6           |
| Supplemental Method 1  | Risk of bias assessment based on Newcastle-Ottawa Scale                                  | 10          |
| Supplemental Table 3   | Risk of bias assessment for each risk factor from individual studies                     | 12          |
| Supplemental Table 4   | Description of studies included in the meta-analysis                                     | 13          |
| Supplemental Table 5   | Number of participants per risk factor, categorized by risk of bias                      | 31          |
| Supplemental Table 6   | Risk of bias of individual risk factors and adjusted covariates in multivariable models  | 32          |
| Supplemental Table 7   | Sex (men versus women) and risk of premature MI                                          | 40          |
| Supplemental Figure 1  | Race (Black versus others) and risk of premature MI                                      | 41          |
| Supplemental Figure 2  | Race (White versus others) and risk of premature MI                                      | 42          |
| Supplemental Table 8   | Demographics and risk of premature MI, categorized by sex                                | 43          |
| Supplemental Figure 3  | Family history of cardiac disease and risk of premature MI                               | 44          |
| Supplemental Figure 4  | Current smoking and risk of premature MI                                                 | 45          |
| Supplemental Figure 5  | Prior smoking and risk of premature MI                                                   | 46          |
| Supplemental Figure 6  | Current alcohol use and risk of premature MI                                             | 47          |
| Supplemental Table 9   | Prior alcohol use and risk of premature MI                                               | 48          |
| Supplemental Table 10  | Lifestyle factors and risk of premature MI, categorized by sex                           | 49          |
| Supplemental Figure 7  | Diabetes (type 1 or type 2) and risk of premature MI                                     | 50          |
| Supplemental Table 11  | Clinical risk factors and risk of premature MI, categorized by sex                       | 51          |
| Supplemental Figure 8  | Hypertension and risk of premature MI                                                    | 52          |
| Supplemental Figure 9  | BMI $\geq 30$ kg/m <sup>2</sup> versus $< 30$ kg/m <sup>2</sup> and risk of premature MI | 53          |
| Supplemental Figure 10 | BMI $\geq 25$ kg/m <sup>2</sup> versus $< 25$ kg/m <sup>2</sup> and risk of premature MI | 54          |
| Supplemental Figure 11 | Dyslipidemia (not specified) and risk of premature MI                                    | 55          |
| Supplemental Figure 12 | Total cholesterol $> 200$ mg/dL and risk of premature MI                                 | 56          |
| Supplemental Table 12  | HDL cholesterol $< 60$ mg/dL and risk of premature MI                                    | 57          |
| Supplemental Figure 13 | High LDL cholesterol (not specified) and risk of premature MI                            | 58          |
| Supplemental Figure 14 | Triglycerides $> 150$ mg/dL and risk of premature MI                                     | 59          |
| Supplemental Table 13  | Lipids (per SD increment) and risk of premature MI                                       | 60          |
| Supplemental Table 13  | Lipids (top vs. lowest quartile) and risk of premature MI                                | 61          |
| Supplemental Table 15  | Biomarkers and risk of premature MI, categorized by sex                                  | 62          |

Apo: apolipoprotein; BMI: body-mass index; HDL: high-density lipoprotein; LDL: low-density lipoprotein; MI: myocardial infarction; SD: standard deviation

**Supplemental Table 1: PRISMA checklist**

| Section/topic                      | #  | Checklist item                                                                                                                                                                                                                                                                                              | Reported on page #                          |
|------------------------------------|----|-------------------------------------------------------------------------------------------------------------------------------------------------------------------------------------------------------------------------------------------------------------------------------------------------------------|---------------------------------------------|
| <b>TITLE</b>                       |    |                                                                                                                                                                                                                                                                                                             |                                             |
| Title                              | 1  | Identify the report as a systematic review, meta-analysis, or both.                                                                                                                                                                                                                                         | 1                                           |
| <b>ABSTRACT</b>                    |    |                                                                                                                                                                                                                                                                                                             |                                             |
| Structured summary                 | 2  | Provide a structured summary including, as applicable: background; objectives; data sources; study eligibility criteria, participants, and interventions; study appraisal and synthesis methods; results; limitations; conclusions and implications of key findings; systematic review registration number. | 2                                           |
| <b>INTRODUCTION</b>                |    |                                                                                                                                                                                                                                                                                                             |                                             |
| Rationale                          | 3  | Describe the rationale for the review in the context of what is already known.                                                                                                                                                                                                                              | 4                                           |
| Objectives                         | 4  | Provide an explicit statement of questions being addressed with reference to participants, interventions, comparisons, outcomes, and study design (PICOS).                                                                                                                                                  | 5                                           |
| <b>METHODS</b>                     |    |                                                                                                                                                                                                                                                                                                             |                                             |
| Protocol and registration          | 5  | Indicate if a review protocol exists, if and where it can be accessed (e.g., Web address), and, if available, provide registration information including registration number.                                                                                                                               | 6                                           |
| Eligibility criteria               | 6  | Specify study characteristics (e.g., PICOS, length of follow-up) and report characteristics (e.g., years considered, language, publication status) used as criteria for eligibility, giving rationale.                                                                                                      | 6-7                                         |
| Information sources                | 7  | Describe all information sources (e.g., databases with dates of coverage, contact with study authors to identify additional studies) in the search and date last searched.                                                                                                                                  | 7                                           |
| Search                             | 8  | Present full electronic search strategy for at least one database, including any limits used, such that it could be repeated.                                                                                                                                                                               | Supplemental Table 2                        |
| Study selection                    | 9  | State the process for selecting studies (i.e., screening, eligibility, included in systematic review, and, if applicable, included in the meta-analysis).                                                                                                                                                   | 6-7                                         |
| Data collection process            | 10 | Describe method of data extraction from reports (e.g., piloted forms, independently, in duplicate) and any processes for obtaining and confirming data from investigators.                                                                                                                                  | 6-7; Supplemental Method 1                  |
| Data items                         | 11 | List and define all variables for which data were sought (e.g., PICOS, funding sources) and any assumptions and simplifications made.                                                                                                                                                                       | Supplemental Table 4                        |
| Risk of bias in individual studies | 12 | Describe methods used for assessing risk of bias of individual studies (including specification of whether this was done at the study or outcome level), and how this information is to be used in any data synthesis.                                                                                      | Supplemental Method1 ; Supplemental Table 3 |
| Summary measures                   | 13 | State the principal summary measures (e.g., risk ratio, difference in means).                                                                                                                                                                                                                               | 8                                           |

|                               |    |                                                                                                                                                                                                          |                                                            |
|-------------------------------|----|----------------------------------------------------------------------------------------------------------------------------------------------------------------------------------------------------------|------------------------------------------------------------|
| Synthesis of results          | 14 | Describe the methods of handling data and combining results of studies, if done, including measures of consistency (e.g., $I^2$ ) for each meta-analysis.                                                | 8-9                                                        |
| <b>RESULTS</b>                |    |                                                                                                                                                                                                          |                                                            |
| Risk of bias across studies   | 15 | Specify any assessment of risk of bias that may affect the cumulative evidence (e.g., publication bias, selective reporting within studies).                                                             | 8-9;<br>Supplemental Method 1;<br>Supplemental Tables 3, 6 |
| Additional analyses           | 16 | Describe methods of additional analyses (e.g., sensitivity or subgroup analyses, meta-regression), if done, indicating which were pre-specified.                                                         | Supplemental Tables 7-14;<br>Supplemental Figures 1-14     |
| Study selection               | 17 | Give numbers of studies screened, assessed for eligibility, and included in the review, with reasons for exclusions at each stage, ideally with a flow diagram.                                          | 34                                                         |
| Study characteristics         | 18 | For each study, present characteristics for which data were extracted (e.g., study size, PICOS, follow-up period) and provide the citations.                                                             | Supplemental Table 4                                       |
| Risk of bias within studies   | 19 | Present data on risk of bias of each study and, if available, any outcome level assessment (see item 12).                                                                                                | Supplemental Tables 3, 6                                   |
| Results of individual studies | 20 | For all outcomes considered (benefits or harms), present, for each study: (a) simple summary data for each intervention group (b) effect estimates and confidence intervals, ideally with a forest plot. | Supplemental Tables 6-14;<br>Supplemental Figures 1-14     |
| Synthesis of results          | 21 | Present the main results of the review. If meta-analyses are done, include for each, confidence intervals and measures of consistency                                                                    | 10-13                                                      |
| Risk of bias across studies   | 22 | Present results of any assessment of risk of bias across studies (see Item 15).                                                                                                                          | 35;<br>Supplemental Method 1;<br>Supplemental Tables 3, 6  |
| Additional analysis           | 23 | Give results of additional analyses, if done (e.g., sensitivity or subgroup analyses, meta-regression [see Item 16]).                                                                                    | Supplemental Tables 6-14;<br>Supplemental Figures 1-14     |
| <b>DISCUSSION</b>             |    |                                                                                                                                                                                                          |                                                            |
| Summary of evidence           | 24 | Summarize the main findings including the strength of evidence for each main outcome; consider their relevance to key groups (e.g., healthcare providers, users, and policy makers).                     | 14-19                                                      |

|                |    |                                                                                                                                                               |       |
|----------------|----|---------------------------------------------------------------------------------------------------------------------------------------------------------------|-------|
| Limitations    | 25 | Discuss limitations at study and outcome level (e.g., risk of bias), and at review-level (e.g., incomplete retrieval of identified research, reporting bias). | 17-18 |
| Conclusions    | 26 | Provide a general interpretation of the results in the context of other evidence, and implications for future research.                                       | 20    |
| <b>FUNDING</b> |    |                                                                                                                                                               |       |
| Funding        | 27 | Describe sources of funding for the systematic review and other support (e.g., supply of data); role of funders for the systematic review.                    | 1     |

## Supplemental Table 2: Search strategy

### Medline; 1946-Present

### Ovid MEDLINE: Epub Ahead of Print, In-Process & Other Non-Indexed Citations, Ovid MEDLINE® Daily and Ovid MEDLINE®

| ID | Searches                                                                                                                                    |
|----|---------------------------------------------------------------------------------------------------------------------------------------------|
| 1  | exp Myocardial Infarction/                                                                                                                  |
| 2  | acute coronary syndrome/                                                                                                                    |
| 3  | (AMI or MI or STEMI or NSTEMI).tw,kf.                                                                                                       |
| 4  | ((heart or coronary or cardiovasc* or cardiac* or myocard*) adj3 (attack* or infarc*)).tw,kf.                                               |
| 5  | (acute adj2 coronary adj2 syndrome).tw,kf.                                                                                                  |
| 6  | Young Adult/                                                                                                                                |
| 7  | Adult/                                                                                                                                      |
| 8  | middle aged.sh.                                                                                                                             |
| 9  | adult.mp.                                                                                                                                   |
| 10 | ((early or premature or pre-mature or young* or earliest or earlier) adj2 (MI or (myocardial adj2 infarc*) or (heart adj2 attack*))).tw,kf. |
| 11 | (early or young* or premature* or earlie* or youth or untimely or oversoon).tw,kf.                                                          |
| 12 | or/1-5 [ MI MeSH headings and textwords]                                                                                                    |
| 13 | or/6-9 [Adults MeSH and textwords]                                                                                                          |
| 14 | 12 and 13 [ MI AND Adults]                                                                                                                  |
| 15 | 14 and 11 [ MI AND Adults AND premature concept textwords]                                                                                  |
| 16 | 15 or 10 [ (MI AND Adults AND premature concept textwords) OR Premature NEAR MI]                                                            |
| 17 | exp Animals/ not (Humans/ and exp Animals/)                                                                                                 |
| 18 | 16 not 17 [Remove animal studies]                                                                                                           |
| 19 | limit 18 to english language                                                                                                                |

Abbreviations: AMI: acute MI; MI: myocardial infarction; NSTEMI: non ST-elevation MI; STEMI: ST-elevation MI

## EMBASE; 1947 to present

| ID | Searches                                                                                                                                                                                                                                                                                                                                                                                                                                                                        |
|----|---------------------------------------------------------------------------------------------------------------------------------------------------------------------------------------------------------------------------------------------------------------------------------------------------------------------------------------------------------------------------------------------------------------------------------------------------------------------------------|
| 1  | heart infarction/ or acute heart infarction/ or anterior myocardial infarction/ or dressler syndrome/ or exp experimental myocardial infarction/ or heart atrium infarction/ or heart reinfarction/ or exp heart ventricle infarction/ or impending heart infarction/ or inferior myocardial infarction/ or non st segment elevation myocardial infarction/ or posterior myocardial infarction/ or silent myocardial infarction/ or st segment elevation myocardial infarction/ |
| 2  | acute coronary syndrome/                                                                                                                                                                                                                                                                                                                                                                                                                                                        |
| 3  | (AMI or MI or STEMI or NSTEMI).tw,kw.                                                                                                                                                                                                                                                                                                                                                                                                                                           |
| 4  | ((heart or coronary or cardiovasc* or cardiac* or myocardi*) adj2 (attack* or infarc*)).tw,kw.                                                                                                                                                                                                                                                                                                                                                                                  |
| 5  | (acute adj1 coronary adj2 syndrome).tw,kw.                                                                                                                                                                                                                                                                                                                                                                                                                                      |
| 6  | young adult/ or adult/                                                                                                                                                                                                                                                                                                                                                                                                                                                          |
| 7  | middle aged/                                                                                                                                                                                                                                                                                                                                                                                                                                                                    |
| 8  | ((early or premature or pre-mature or young* or earliest or earlier) adj2 (MI or (myocardial adj2 infarc*) or (heart adj2 attack*))).tw.                                                                                                                                                                                                                                                                                                                                        |
| 9  | (early or young* or premature* or earlie* or youth or untimely or oversoon).tw,kw.                                                                                                                                                                                                                                                                                                                                                                                              |
| 10 | or/1-5 [MI Emtree and textwords]                                                                                                                                                                                                                                                                                                                                                                                                                                                |
| 11 | or/6-7 [Age]                                                                                                                                                                                                                                                                                                                                                                                                                                                                    |
| 12 | (exp animal/ or nonhuman/) not exp human/                                                                                                                                                                                                                                                                                                                                                                                                                                       |
| 13 | 10 and 11 [MI AND Age]                                                                                                                                                                                                                                                                                                                                                                                                                                                          |
| 14 | 13 and 9 [MI AND Age AND premature concept textwords]                                                                                                                                                                                                                                                                                                                                                                                                                           |
| 15 | 14 or 8 [ (MI AND Adults AND premature concept textwords) OR Premature NEAR MI]                                                                                                                                                                                                                                                                                                                                                                                                 |
| 16 | 15 not 12 [Remove animal studies]                                                                                                                                                                                                                                                                                                                                                                                                                                               |
| 17 | limit 16 to english language                                                                                                                                                                                                                                                                                                                                                                                                                                                    |

Abbreviations: AMI: acute MI; MI: myocardial infarction; NSTEMI: non ST-elevation MI; STEMI: ST-elevation MI

**EBSCO CINAHL**

| ID  | Search Terms                                                                                                                                                                           |
|-----|----------------------------------------------------------------------------------------------------------------------------------------------------------------------------------------|
| S14 | S11 OR S12                                                                                                                                                                             |
| S13 | S11 OR S12                                                                                                                                                                             |
| S12 | (young or premature or early) N2 (MI or myocardial or infarction)                                                                                                                      |
| S11 | S9 AND S10                                                                                                                                                                             |
| S10 | TI (early or young* or premature* or earlie* or youth or untimely or oversoon) OR AB (early or young* or premature* or earlie* or youth or untimely or oversoon)                       |
| S9  | S7 AND S8                                                                                                                                                                              |
| S8  | S5 OR S6                                                                                                                                                                               |
| S7  | S1 OR S2 OR S3 OR S4                                                                                                                                                                   |
| S6  | TI adult* OR AB adult*                                                                                                                                                                 |
| S5  | (MH "Young Adult") OR (MH "Middle Age") OR (MH "Adult")                                                                                                                                |
| S4  | TI (acute N2 coronary) N2 syndrome OR AB (acute N2 coronary) N2 syndrome                                                                                                               |
| S3  | TI ( (heart or coronary or cardiovasc* or cardiac* or myocard*) N2 (attack* or infarc*) ) OR AB ( (heart or coronary or cardiovasc* or cardiac* or myocard*) N2 (attack* or infarc*) ) |
| S2  | TI (AMI or MI or STEMI or NSTEM) OR AB (AMI or MI or STEMI or NSTEM)                                                                                                                   |
| S1  | (MH "Myocardial Infarction") OR (MH "Acute Coronary Syndrome")                                                                                                                         |

Abbreviations: AMI: acute MI; MI: myocardial infarction; NSTEMI: non ST-elevation MI; STEMI: ST-elevation MI



## Cochrane CENTRAL

| ID | Search Terms                                                                                                                             |
|----|------------------------------------------------------------------------------------------------------------------------------------------|
| 1  | MeSH descriptor: [Acute Coronary Syndrome] this term only                                                                                |
| 2  | AMI or MI or STEMI or NSTEMI                                                                                                             |
| 3  | (heart or coronary or cardiovasc* or cardiac* or myocard*) near/3 (attack* or infarc*)                                                   |
| 4  | MeSH descriptor: [Myocardial Infarction] 1 tree(s) exploded                                                                              |
| 5  | (acute near/2 coronary) near/3 syndrome                                                                                                  |
| 6  | MeSH descriptor: [Young Adult] this term only                                                                                            |
| 7  | MeSH descriptor: [Adult] this term only                                                                                                  |
| 8  | MeSH descriptor: [Middle Aged] this term only                                                                                            |
| 9  | (early or premature or pre-mature or young* or earliest or earlier) near/3 (MI or (myocardial near/2 infarc*) or (heart near/2 attack*)) |
| 10 | early or young* or premature* or earlie* or youth or untimely or oversoon                                                                |
| 11 | #1 or #2 or #3 or #4 or #5                                                                                                               |
| 12 | #6 or #7 or #8                                                                                                                           |
| 13 | #11 and #12                                                                                                                              |
| 14 | #13 or #9                                                                                                                                |
| 15 | #10 and #14 in Trials                                                                                                                    |

Abbreviations: AMI: acute MI; MI: myocardial infarction; NSTEMI: non ST-elevation MI; STEMI: ST-elevation MI

## Supplemental Method 1: Risk of Bias Assessment based on Newcastle-Ottawa Scale

### Newcastle-Ottawa Quality Assessment Scale (Case Control Studies)

#### Selection

- 1) Is the case (i.e., premature MI) definition adequate?
  - a) yes, with independent validation (low risk of bias)
  - b) yes, e.g. record linkage or based on self-reports (low risk of bias)
  - c) no description (unclear risk of bias)
- 2) Representativeness of premature MI cases
  - a) consecutive or obviously representative series of premature MI (low risk of bias)
  - b) potential for selection biases (high risk of bias)
  - c) not stated (unclear risk of bias)
- 3) Selection of Controls
  - a) hospital controls (low risk of bias)
  - b) community controls (low risk of bias)
  - c) no description provided (unclear risk of bias)
- 4) Definition of Controls
  - a) no history of premature MI based on record or self-report (low risk of bias)
  - b) no description of source (unclear risk of bias)

#### Comparability

- 1) Comparability of cases and controls on the basis of the design or analysis
  - a) study controls for age (low risk of bias)
  - b) study controls for  $\geq 1$  risk factors in risk models (low risk of bias)
  - c) consider low-quality if not adjusted (high risk of bias)

#### Exposure

- 1) Ascertainment of exposure
  - a) secure record (e.g. surgical records) (low risk of bias)
  - b) structured interview where blind to case/control status (high risk of bias)
  - c) interview not blinded to case/control status (high risk of bias)
  - d) written self-report (high risk of bias)
  - e) or medical record only (low risk of bias)
  - f) no description (unclear risk of bias)
- 2) Same method of ascertainment for cases and controls
  - a) yes (low risk of bias)
  - b) no (high risk of bias)
  - c) not reported (unclear risk of bias)
- 3) Non-Response rate
  - a) same rate for both groups (low risk of bias)
  - b) non respondents described (low risk of bias)
  - c) rate different and no designation (high risk of bias)

## Newcastle-Ottawa Quality Assessment Scale (Cohort Studies)

### **Selection**

- 1) Representativeness of study population
  - a) truly representative of average individual in the community (low risk of bias)
  - b) somewhat representative of average individual in the community (low risk of bias)
  - c) selected group of users e.g. nurses, volunteers (high risk of bias)
  - d) no description of the derivation of the cohort (unclear risk of bias)
- 2) Selection of the non-exposed participants
  - a) drawn from the same community as the exposed cohort (low risk of bias)
  - b) drawn from a different source (high risk of bias)
  - c) no description of the derivation of the non exposed cohort (unclear risk of bias)
- 3) Ascertainment of exposure
  - a) secure record (e.g. medical records) (low risk of bias)
  - b) structured interview (high risk of bias)
  - c) written self-report (high risk of bias)
  - e) no description (unclear risk of bias)
- 4) Demonstration that outcome of interest (i.e., premature MI) was not present at start of study
  - a) yes (low risk of bias)
  - b) no (unclear risk of bias)

### **Comparability**

- 1) Comparability of cohorts on the basis of the analysis
  - a) study controls for age (low risk of bias)
  - b) study controls for  $\geq 1$  risk factors in risk models (high risk of bias)

### **Outcome**

- 1) Assessment of outcome
  - a) independent blind assessment (low risk of bias)
  - b) record linkage (i.e., ICD codes) (low risk of bias)
  - c) self-report (high risk of bias)
  - d) no description (unclear risk of bias)
- 2) Was follow-up long enough (i.e., at least 12 months) for outcome to occur?
  - a) yes (low risk of bias)
  - b) no (high risk of bias)
  - c) Not reported (unclear risk of bias)
- 3) Adequacy of follow up of cohorts
  - a) complete follow up- all subjects accounted for (low risk of bias)
  - b) subjects lost to follow up unlikely to introduce bias- small number lost-  $>80\%$  follow up, or description provided of those lost) (low risk of bias)
  - c) follow up rate  $< 80\%$  and no description of those lost (high risk of bias)
  - d) no statement (unclear risk of bias)

**Supplemental Table 3: Risk of bias assessment for each risk factor from individual studies**

| <b>Result reported</b>                            | <b>Risk factor</b>                                                   | <b>Risk factor ascertainment</b>                                                            | <b>Risk of Bias</b>                                     |
|---------------------------------------------------|----------------------------------------------------------------------|---------------------------------------------------------------------------------------------|---------------------------------------------------------|
| frequency                                         | smoking                                                              | self-reported                                                                               | high                                                    |
|                                                   | family history of cardiac disease                                    |                                                                                             |                                                         |
|                                                   | alcohol use                                                          |                                                                                             |                                                         |
|                                                   | clinical risk factor (e.g., diabetes, hypertension)                  |                                                                                             |                                                         |
| frequency                                         | race                                                                 | self-reported                                                                               | moderate                                                |
|                                                   | clinical risk factor (e.g., diabetes, hypertension)                  | verified (measuring HbA1c, blood pressure, lipids, or if on medicines for these conditions) |                                                         |
|                                                   |                                                                      |                                                                                             |                                                         |
| <b>Result reported</b>                            | <b>Risk factor ascertainment</b>                                     | <b>Risk estimate adjustment</b>                                                             | <b>Risk of Bias</b>                                     |
| risk estimate<br>(e.g., odds ratio, hazard ratio) | 1. Verified from medical record<br>2. Self-reported or not described | A. >1 factor adjusted<br>B. ≤1 factor adjusted                                              | 1A = low<br>1B = moderate<br>2A = moderate<br>2B = high |

**Supplemental Table 4: Description of studies included in current meta-analysis**

| Study                         | Countries | Number of participants; age                             | Sex  | Risk factor for current meta-analysis | Risk factor definition provided by study authors                                                                                                                                                                                         |                |
|-------------------------------|-----------|---------------------------------------------------------|------|---------------------------------------|------------------------------------------------------------------------------------------------------------------------------------------------------------------------------------------------------------------------------------------|----------------|
| Ambroziak_2018 <sup>66</sup>  | Poland    | MI: 158;<br>26y–49y<br><br>No MI: 155;<br>30y–49y       | M; F | DM (type 1 or type 2)                 | Medical history and treatment, or, fasting plasma glucose $\geq 126$ mg/dL, or, glucose $\geq 200$ mg/dL in oral glucose tolerance test.                                                                                                 |                |
|                               |           |                                                         |      | Family history of cardiac disease     | MI or stroke in first degree relatives (men <55 years; women <65 years).                                                                                                                                                                 |                |
|                               |           |                                                         |      | Hypertension                          | Medical history and treatment, or, based on mean value of two measurements of sBP and dBP performed after at least 5 minutes sitting, made in 5-minute intervals. Hypertension defined as sBP $\geq 140$ mmHg and/or dBP $\geq 90$ mmHg. |                |
|                               |           |                                                         |      | Smoking, current                      | Current smoker.                                                                                                                                                                                                                          |                |
| Antoniades_2005 <sup>67</sup> | Greece    | MI: 228;<br>$\leq 49y$<br><br>No MI: 519;<br>$\leq 49y$ | M; F | DM (type 1 or type 2)                 | ---                                                                                                                                                                                                                                      |                |
|                               |           |                                                         |      | Dyslipidemia, not specified           | Hypercholesterolemia, not described.                                                                                                                                                                                                     |                |
|                               |           |                                                         |      | Hypertension                          | ---                                                                                                                                                                                                                                      |                |
|                               |           |                                                         |      | Smoking, prior                        | ---                                                                                                                                                                                                                                      |                |
|                               |           |                                                         |      | Smoking, current                      | ---                                                                                                                                                                                                                                      |                |
| Arthes_1976 <sup>68</sup>     | USA       | MI: 131;<br>30y–44y                                     | F    | DM (type 1 or type 2)                 | Clinical diagnosis, not described.                                                                                                                                                                                                       |                |
|                               |           | No MI: 1172;<br>30y–44y                                 |      | Race (White versus other)             |                                                                                                                                                                                                                                          | Self-reported. |
|                               |           | MI: 136;<br>30y–44y                                     |      |                                       |                                                                                                                                                                                                                                          |                |
|                               |           | No MI: 1391;<br>30y–44y                                 |      |                                       |                                                                                                                                                                                                                                          |                |
| Bahrami_2015 <sup>69</sup>    | Iran      | MI: 211;<br>$\leq 50y$<br><br>No MI: 203;<br>$\leq 50y$ | M; F | Dyslipidemia, not specified           | Hyperlipidemia not described.                                                                                                                                                                                                            |                |
|                               |           |                                                         |      | Family history of cardiac disease     | ---                                                                                                                                                                                                                                      |                |
|                               |           |                                                         |      | Hypertension                          | ---                                                                                                                                                                                                                                      |                |
|                               |           |                                                         |      | Smoking, current                      | ---                                                                                                                                                                                                                                      |                |
| Balogh_2018 <sup>70</sup>     | Hungary   | MI: 119;<br>$\leq 40y$<br><br>No MI: 101;<br>$\leq 40y$ | M; F | DM (type 1 or type 2)                 | HbA1c $\geq 6.5$ % (measured if diabetes was clinically suspected due to higher blood glucose values during hospitalization) or if diabetes was recorded in previous medical history.                                                    |                |

| Study                    | Countries | Number of participants; age                         | Sex  | Risk factor for current meta-analysis                  | Risk factor definition provided by study authors                                                                          |
|--------------------------|-----------|-----------------------------------------------------|------|--------------------------------------------------------|---------------------------------------------------------------------------------------------------------------------------|
|                          |           |                                                     |      | Dyslipidemia                                           | LDL cholesterol >3.4 mmol/L or on cholesterol-lowering medication.                                                        |
|                          |           |                                                     |      | Family history of cardiac disease                      | Major cardiovascular event such as MI, stroke, or non-traumatic lower limb amputation in first-degree relative <60 years. |
|                          |           |                                                     |      | Hypertension                                           | sBP ≥140 mmHg and/or dBP ≥90 mmHg or on medication.                                                                       |
|                          |           |                                                     |      | Smoking, prior                                         | Quit smoking ≥6 months prior to blood draw.                                                                               |
|                          |           |                                                     |      | Smoking, current                                       | ≥10 cigarettes/day for ≥6 months.                                                                                         |
| Benze_2002 <sup>71</sup> | Germany   | MI: 287<br>35y–45y<br><br>No MI: 138<br>age-matched | M    | DM (type 1 or type 2)                                  | ---                                                                                                                       |
|                          |           |                                                     |      | Family history of cardiac disease                      | ---                                                                                                                       |
|                          |           |                                                     |      | Smoking, current                                       | ---                                                                                                                       |
| Caimi_2018 <sup>72</sup> | Italy     | MI: 120<br>19y–45y<br><br>No MI: 50<br>19y–46y      | M; F | BMI ≥25 kg/m <sup>2</sup> versus <25 kg/m <sup>2</sup> | BMI 25-30 kg/m <sup>2</sup> .                                                                                             |
|                          |           |                                                     |      | BMI ≥30 kg/m <sup>2</sup> versus <30 kg/m <sup>2</sup> | BMI ≥30 kg/m <sup>2</sup> .                                                                                               |
| Celik_2008 <sup>73</sup> | Turkey    | MI: 129;<br>24y–45y<br><br>No MI: 107;<br><45y      | M; F | BMI ≥30 kg/m <sup>2</sup> versus <30 kg/m <sup>2</sup> | BMI ≥30 kg/m <sup>2</sup> .                                                                                               |
|                          |           |                                                     |      | DM (type 1 or type 2)                                  | Fasting glucose >126 mg/dL, non-fasting glucose >200 mg/dL and current use of medication.                                 |
|                          |           |                                                     |      | Total cholesterol >200 mg/dL                           | Fasting total cholesterol. Cut-off not reported.                                                                          |
|                          |           |                                                     |      | HDL cholesterol <60 mg/dL                              | Fasting HDL cholesterol. Used risk estimate for HDL cholesterol 28-63 mg/dL category.                                     |
|                          |           |                                                     |      | LDL cholesterol, high, not specified                   | Fasting LDL cholesterol; cut-off not reported.                                                                            |
|                          |           |                                                     |      | Triglycerides >150 mg/dL                               | Fasting triglyceride; cut-off not reported.                                                                               |
|                          |           |                                                     |      | Family history of cardiac disease                      | At least one first degree relative (men <55 years; women <65 years) with CAD.                                             |
|                          |           |                                                     |      | Hypertension                                           | Seated sBP ≥140 mmHg, dBP ≥90 mmHg, or use of medication for hypertension within prior 2 weeks.                           |
|                          |           |                                                     |      | Sex, male                                              | Male versus female.                                                                                                       |
|                          |           |                                                     |      | Smoking, current                                       | Current, regular smoker.                                                                                                  |

| Study                          | Countries      | Number of participants; age                                                            | Sex  | Risk factor for current meta-analysis                        | Risk factor definition provided by study authors                                                                                                                                                                                                            |
|--------------------------------|----------------|----------------------------------------------------------------------------------------|------|--------------------------------------------------------------|-------------------------------------------------------------------------------------------------------------------------------------------------------------------------------------------------------------------------------------------------------------|
| Cetin_2017 <sup>74</sup>       | Turkey         | MI: 168;<br><45y males; <55y females<br><br>No MI: 224;<br><45y males; <55y females    | M; F | DM (type 1 or type 2)                                        | Fasting glucose >126 mg/dL and on medication.                                                                                                                                                                                                               |
|                                |                |                                                                                        |      | Dyslipidemia, not specified                                  | Total cholesterol >200 mg/dL, LDL cholesterol >130 mg/dL, triglyceride >150 mg/dL or on lipid-lowering medication.                                                                                                                                          |
|                                |                |                                                                                        |      | Family history of cardiac disease                            | CAD in parent or sibling (men <55 years; women <65 years).                                                                                                                                                                                                  |
|                                |                |                                                                                        |      | Hypertension                                                 | sBP >140 mmHg and/or dBP >90 mmHg, or on medication.                                                                                                                                                                                                        |
|                                |                |                                                                                        |      | Smoking, current                                             | Current or quit smoking within 1 year prior to MI.                                                                                                                                                                                                          |
| Choi_2018 <sup>75</sup>        | South Korea    | MI: 5263<br><52y<br>(M 4932; F 331)<br><br>No MI: 7257000<br>(M 1278907;<br>F 5968793) | M;F  | BMI $\geq 25$ kg/m <sup>2</sup> versus <25 kg/m <sup>2</sup> | BMI 25 – 29.9 kg/m <sup>2</sup> compared to normal BMI (18.5 – 22.9 kg/m <sup>2</sup> )                                                                                                                                                                     |
|                                |                |                                                                                        |      | BMI $\geq 30$ kg/m <sup>2</sup> versus <30 kg/m <sup>2</sup> | BMI $\geq 30$ kg/m <sup>2</sup> compared to normal BMI (18.5 – 22.9 kg/m <sup>2</sup> )                                                                                                                                                                     |
| Ciruzzi_1997 <sup>76</sup>     | Argentina      | MI: 371;<br><55y<br><br>No MI: 378;<br><55y                                            | M; F | Family history of cardiac disease                            | Two or more family members (parents and siblings) with acute MI.                                                                                                                                                                                            |
| Danesh_1999 <sup>77</sup>      | UK             | MI: 1122;<br>30y–49y<br><br>No MI: 1122;<br>30y–49y                                    | M; F | DM (type 1 or type 2)                                        | Treated diabetes.                                                                                                                                                                                                                                           |
|                                |                |                                                                                        |      | Hypertension                                                 | Treated hypertension.                                                                                                                                                                                                                                       |
|                                |                |                                                                                        |      | Smoking, current                                             | ---                                                                                                                                                                                                                                                         |
| De Caterina_2011 <sup>78</sup> | Italy, UK, USA | MI: 1864;<br><45y<br><br>No MI: 1864;<br><45y                                          | M; F | Triglycerides >150 mg/dL                                     | Fasting triglyceride >150 mg/dL.                                                                                                                                                                                                                            |
|                                |                |                                                                                        |      | Family history of cardiac disease                            | At least one parent, offspring, or sibling (men <55 years; women <65 years) with CAD.                                                                                                                                                                       |
|                                |                |                                                                                        |      | Smoking, current                                             | Current smokers (regularly smoked during the three years preceding MI); former smokers (smoked regularly for $\geq 3$ years but not during the year preceding the infarction); never smokers (never smoked regularly or had smoked regularly for <3 years). |

| Study                       | Countries       | Number of participants; age                               | Sex  | Risk factor for current meta-analysis                        | Risk factor definition provided by study authors                                                                             |
|-----------------------------|-----------------|-----------------------------------------------------------|------|--------------------------------------------------------------|------------------------------------------------------------------------------------------------------------------------------|
|                             |                 |                                                           |      | Alcohol, current                                             | Moderate consumption (10–30 g ethanol /day); high consumption >30 g ethanol/day).                                            |
| Doggen_2006 <sup>79</sup>   | The Netherlands | MI: 154;<br><50y<br><br>No MI: 160;<br><50y               | M    | BMI $\geq 30$ kg/m <sup>2</sup> versus <30 kg/m <sup>2</sup> | BMI $\geq 30$ kg/m <sup>2</sup> .                                                                                            |
|                             |                 |                                                           |      | BMI $\geq 25$ kg/m <sup>2</sup> versus <25 kg/m <sup>2</sup> | BMI 25-30 kg/m <sup>2</sup> .                                                                                                |
|                             |                 |                                                           |      | DM (type 1 or type 2)                                        | MI: DM diagnosed from hospital discharge letters.<br>No MI: DM diagnosed through interviews.                                 |
|                             |                 |                                                           |      | Dyslipidemia                                                 | Medication for hypercholesterolemia.                                                                                         |
|                             |                 |                                                           |      | Hypertension                                                 | Medication for hypertension.                                                                                                 |
|                             |                 |                                                           |      | Smoking, prior                                               | Ex-smoker.                                                                                                                   |
|                             |                 |                                                           |      | Alcohol, current                                             | Regular use.                                                                                                                 |
| Dogra_2012 <sup>80</sup>    | India           | MI: 184;<br>$\leq 40$ y<br><br>No MI: 350;<br>$\leq 40$ y | M; F | BMI $\geq 25$ kg/m <sup>2</sup> versus <25 kg/m <sup>2</sup> | High BMI (>23 kg/m <sup>2</sup> ) versus normal BMI (18.5–22.9 kg/m <sup>2</sup> ).                                          |
|                             |                 |                                                           |      | DM (type 1 or type 2)                                        | Fasting glucose >140 mg/dL or on medication.                                                                                 |
|                             |                 |                                                           |      | Family history of cardiac disease                            | At least one first or second degree relative with CAD.                                                                       |
|                             |                 |                                                           |      | Hypertension                                                 | BP >140/90 mmHg or on medication.                                                                                            |
|                             |                 |                                                           |      | Smoking, current                                             | Smoked $\geq 1$ g /day or smoked this amount for 1–3 months prior to interview.                                              |
|                             |                 |                                                           |      | Alcohol, current                                             | Current use.                                                                                                                 |
| Elmfeldt_1976 <sup>81</sup> | Sweden          | MI: 190<br><55y<br><br>No MI: 3035<br><55y                | M    | Hypertension                                                 | Self-reported.                                                                                                               |
|                             |                 | MI: 190<br><55y<br><br>No MI: 2989<br><55y                |      | Smoking, current                                             | Smoked $\geq 1$ g/day or had smoked this amount for at least a month up to a time less than 3 months prior to the interview. |
| Emanuele_2010 <sup>82</sup> | Italy           | MI: 218;<br>24y–39y<br><br>No MI: 258;<br>22y–39y         | M; F | Smoking, current                                             | ---                                                                                                                          |
| Franco_2000 <sup>83</sup>   | Brazil          | MI: 150;<br>25y–55y<br><br>No MI: 150;<br>22y–55y         | M; F | BMI $\geq 30$ kg/m <sup>2</sup> versus <30 kg/m <sup>2</sup> | BMI $\geq 27.3$ kg/m <sup>2</sup> (women);<br>BMI $\geq 30$ kg/m <sup>2</sup> (men).                                         |
|                             |                 |                                                           |      | DM (type 1 or type 2)                                        | Diagnosis of DM or on medication.                                                                                            |
|                             |                 |                                                           |      | Dyslipidemia, not specified                                  | Diagnosis of dyslipidemia or on medication.                                                                                  |



| Study                          | Countries | Number of participants; age                                       | Sex  | Risk factor for current meta-analysis                        | Risk factor definition provided by study authors                                                        |
|--------------------------------|-----------|-------------------------------------------------------------------|------|--------------------------------------------------------------|---------------------------------------------------------------------------------------------------------|
|                                |           |                                                                   |      | Family history of cardiac disease                            | ---                                                                                                     |
|                                |           |                                                                   |      | Hypertension                                                 | Diagnosis of hypertension or on medication.                                                             |
|                                |           |                                                                   |      | Smoking, current                                             | Recent history of regular cigarette consumption.                                                        |
| Friedlander_2001 <sup>84</sup> | USA       | MI: 107;<br>18y–44y<br><br>No MI: 525;<br>18y–44y                 | F    | DM (type 1 or type 2)                                        | Self-report of physician-diagnosed DM.                                                                  |
|                                |           |                                                                   |      | Family history of cardiac disease                            | MI in first-degree relative.                                                                            |
|                                |           |                                                                   |      | Race                                                         | White versus other.                                                                                     |
| Gertler_1951 <sup>85</sup>     | USA       | MI: 100;<br><40y<br><br>No MI: 146;                               | M; F | Total cholesterol >200 mg/dL                                 | Total cholesterol >305 mg/dL.                                                                           |
|                                |           |                                                                   |      | Family history of cardiac disease                            | At least one parent with CHD.                                                                           |
| Guella_2011 <sup>86</sup>      | Italy     | MI: 1880;<br><45y<br><br>No MI: 1880;<br><45y                     | M; F | BMI $\geq 30$ kg/m <sup>2</sup> versus <30 kg/m <sup>2</sup> | BMI >30 kg/m <sup>2</sup> .                                                                             |
|                                |           |                                                                   |      | BMI $\geq 25$ kg/m <sup>2</sup> versus <25 kg/m <sup>2</sup> | BMI 25-30 kg/m <sup>2</sup> .                                                                           |
|                                |           |                                                                   |      | DM (type 1 or type 2)                                        | Self-report of physician-diagnosed DM.                                                                  |
|                                |           |                                                                   |      | Dyslipidemia, not specified                                  | Cholesterol >5.2 mmol/L or on statin therapy.                                                           |
|                                |           |                                                                   |      | Hypertension                                                 | sBP >140 mmHg and/or dBP >90 mmHg or on medication.                                                     |
| Gupta_2018 <sup>87</sup>       | India     | MI: 125;<br>$\leq 35$ y<br><br>No MI: 103;<br>$\leq 35$ y         | M; F | Family history of cardiac disease                            | ---                                                                                                     |
|                                |           |                                                                   |      | Hypertension                                                 | ---                                                                                                     |
|                                |           |                                                                   |      | Smoking, current                                             | ---                                                                                                     |
|                                |           |                                                                   |      | DM (type 1 or type 2)                                        | ---                                                                                                     |
|                                |           |                                                                   |      | BMI $\geq 25$ kg/m <sup>2</sup> versus <25 kg/m <sup>2</sup> | ---                                                                                                     |
| Hamsten_1986A <sup>88</sup>    | Sweden    | MI: 116;<br><45y<br><br>No MI: 116;<br><45y                       | M    | DM (type 1 or type 2)                                        | Fasting glucose $\geq 7.0$ mmol/L.                                                                      |
|                                |           |                                                                   |      | Hypertension                                                 | Medication for hypertension prior to MI or immediately post-MI or if sBP >160 mmHg and/or dBP >95 mmHg. |
|                                |           |                                                                   |      | Smoking, prior                                               | Former smoker.                                                                                          |
|                                |           |                                                                   |      | Smoking, current                                             | Current smoker; at least 1 cigarette or equivalent amount of tobacco each day.                          |
| Hbejan_2011 <sup>89</sup>      | Syria     | MI: 287;<br>18y–45y<br><br>No MI: 292;<br>18y–45y<br><br>MI: 329; | M    | DM (type 1 or type 2)                                        | Self-reported.                                                                                          |
|                                |           |                                                                   |      | Dyslipidemia, not specified                                  | Self-reported.                                                                                          |
|                                |           |                                                                   |      | Family history of cardiac disease                            | At least one first-degree relative with MI.                                                             |
|                                |           |                                                                   |      | Hypertension                                                 | Self-reported.                                                                                          |
|                                |           |                                                                   | M; F | Smoking, prior                                               | Quit smoking >6 months prior to MI.                                                                     |

| Study                         | Countries | Number of participants; age                                                         | Sex  | Risk factor for current meta-analysis | Risk factor definition provided by study authors                                                                                                         |
|-------------------------------|-----------|-------------------------------------------------------------------------------------|------|---------------------------------------|----------------------------------------------------------------------------------------------------------------------------------------------------------|
|                               |           | 18y–45y<br><br>No MI: 778<br>18y–45y                                                |      | Smoking, current                      | Quit smoking <6 months prior to MI.                                                                                                                      |
| Iacoviello_2005 <sup>90</sup> | Italy     | MI: 374;<br><45y males; <50y females<br><br>No MI: 386;<br><45y males; <50y females | M; F | DM (type 1 or type 2)                 | Fasting glucose $\geq 140$ mg/dL or on medication.                                                                                                       |
|                               |           | MI: 382;<br><45y males; <50y females<br><br>No MI: 402;<br><45y males; <50y females |      | Dyslipidemia, not specified           | Hypercholesterolemia ( $\geq 200$ mg/dL), hypertriglyceridemia ( $\geq 200$ mg/dL), HDL cholesterol ( $\leq 35$ mg/dL), or on lipid-lowering medication. |
|                               |           | MI: 313;<br><45y males; <50y females<br><br>No MI: 312;<br><45y males; <50y females |      | Family history of cardiac disease     | $\geq 1$ first-degree relative (<60 years) with MI.                                                                                                      |
|                               |           | MI: 368;<br><45y males; <50y females<br><br>No MI: 384;<br><45y males; <50y females |      | Hypertension                          | BP $\geq 140/90$ mmHg or on medication.                                                                                                                  |
|                               |           | MI: 378;<br><45y males; <50y females<br><br>No MI: 395;<br><45y males; <50y females |      | Smoking, prior                        | Former smoker.                                                                                                                                           |

| Study                      | Countries                     | Number of participants; age                                                         | Sex | Risk factor for current meta-analysis | Risk factor definition provided by study authors          |      |                |                         |
|----------------------------|-------------------------------|-------------------------------------------------------------------------------------|-----|---------------------------------------|-----------------------------------------------------------|------|----------------|-------------------------|
|                            |                               | MI: 378;<br><45y males; <50y females<br><br>No MI: 395;<br><45y males; <50y females |     | Smoking, current                      | Current smoker.                                           |      |                |                         |
| Inbal_1999 <sup>91</sup>   | Israel                        | MI:109;<br>29y–52y<br><br>No MI: 187;<br>26y–52y                                    | M   | DM (type 1 or type 2)                 | From medical chart, not described.                        |      |                |                         |
|                            |                               | MI: 106;<br>29y–52y<br><br>No MI: 177;<br>26y–52y                                   |     | Total cholesterol >200 mg/dL          | Serum cholesterol level >200 mg/dL on hospital admission. |      |                |                         |
|                            |                               | MI: 111;<br>29y–52y<br><br>No MI: 184;<br>26y–52y                                   |     | Hypertension                          | sBP ≥140 mmHg on hospital admission.                      |      |                |                         |
|                            |                               | MI: 112;<br>29y–52y<br><br>No MI: 187;<br>26y–52y                                   |     | Smoking, prior                        | Former smoker.                                            |      |                |                         |
|                            |                               | MI: 112;<br>29y–52y<br><br>No MI: 187;<br>26y–52y                                   |     | Smoking, current                      | Current smoker.                                           |      |                |                         |
|                            |                               | Jolly_2010 <sup>92</sup>                                                            |     | USA                                   | MI: 7261;<br>35–54y                                       | M; F | Race           | Black versus other.     |
|                            |                               | Kaufman_1983 <sup>93</sup>                                                          |     | USA                                   | MI: 502;<br>30y–54y<br><br>No MI: 835;<br>30y–54y         | M    | Smoking, prior | Ex-smoker versus never. |
| Smoking, current           | Any number of cigarettes/day. |                                                                                     |     |                                       |                                                           |      |                |                         |
| Kaufman_1985 <sup>94</sup> | USA                           | MI: 2170;                                                                           | M   | Alcohol, current                      | Any alcohol intake.                                       |      |                |                         |

| Study                            | Countries   | Number of participants; age                        | Sex  | Risk factor for current meta-analysis                  | Risk factor definition provided by study authors                                     |
|----------------------------------|-------------|----------------------------------------------------|------|--------------------------------------------------------|--------------------------------------------------------------------------------------|
|                                  |             | 30y–54y<br>No MI: 981;<br>30y–54y                  |      | Alcohol, prior                                         | Last drink ≥1 year prior to admission.                                               |
| Khare_2005 <sup>95</sup>         | India       | MI: 120;<br><40y<br>No MI: 40;<br><40y             | M; F | Family history of cardiac disease                      | ---                                                                                  |
| Kinjo_2002 <sup>96</sup>         | Japan       | MI: 121;<br><55y<br>No MI: 182;<br><55y            | M; F | DM (type 1 or type 2)                                  | Fasting plasma glucose ≥126 mg/dL or on medication.                                  |
|                                  |             |                                                    |      | Hypertension                                           | BP ≥140/90 mmHg or on medication.                                                    |
|                                  |             |                                                    |      | Smoking, current                                       | Current or prior smoking.                                                            |
| La Vecchia_1987A <sup>97</sup>   | Italy       | MI: 168;<br><55y<br>No MI: 1122;<br>23y–54y        | F    | BMI ≥25 kg/m <sup>2</sup> versus <25 kg/m <sup>2</sup> | BMI ≥25 versus <25 kg/m <sup>2</sup> .                                               |
| La Vecchia_1987B <sup>98</sup>   | Italy       | MI: 202;<br><55y<br>No MI: 374;<br>23y–54y         | F    | DM (type 1 or type 2)                                  | Self-reported.                                                                       |
|                                  |             |                                                    |      | Dyslipidemia, not specified                            | Self-reported.                                                                       |
|                                  |             |                                                    |      | Family history of cardiac disease                      | Self-reported.                                                                       |
|                                  |             |                                                    |      | Hypertension                                           | Self-reported.                                                                       |
|                                  |             |                                                    |      | Smoking, prior                                         | Self-reported.                                                                       |
|                                  |             |                                                    |      | Smoking, current                                       | Self-reported.                                                                       |
| Le Cam-Duchez_2009 <sup>99</sup> | France      | MI: 176;<br><46y<br>No MI: 176;<br><46y            | M; F | BMI ≥30 kg/m <sup>2</sup> versus <30 kg/m <sup>2</sup> | BMI >30 kg/m <sup>2</sup> .                                                          |
|                                  |             |                                                    |      | Dyslipidemia, not specified                            | ---                                                                                  |
|                                  |             |                                                    |      | Family history of cardiac disease                      | ---                                                                                  |
|                                  |             |                                                    |      | Smoking, current                                       | ---                                                                                  |
| Lee_2020 <sup>34</sup>           | South Korea | Age 20–39y at enrollment; follow-up within 8 years | M; F | Total cholesterol                                      | Top vs. lowest quartile                                                              |
|                                  |             |                                                    |      | HDL cholesterol                                        | Top vs. lowest quartile                                                              |
|                                  |             |                                                    |      | LDL cholesterol                                        | Top vs. lowest quartile                                                              |
|                                  |             |                                                    |      | Triglycerides                                          | Top vs. lowest quartile                                                              |
| Leitersdorf_1986 <sup>100</sup>  | Israel      | MI: 258;<br><55y<br>No MI: 377;<br><55y            | M    | DM (type 1 or type 2)                                  | MI: self-reported physician diagnosis.<br>No MI: 12 hour fasting glucose ≥120 mg/dL. |
|                                  |             |                                                    |      | Hypertension                                           | MI: self-reported physician diagnosis.<br>No MI: BP ≥150/100 mmHg or on medication.  |
|                                  |             |                                                    |      | Smoking, prior                                         | Quit smoking ≥1 month prior to interview.                                            |

| Study                             | Countries       | Number of participants; age                               | Sex  | Risk factor for current meta-analysis                           | Risk factor definition provided by study authors                                                  |
|-----------------------------------|-----------------|-----------------------------------------------------------|------|-----------------------------------------------------------------|---------------------------------------------------------------------------------------------------|
|                                   |                 |                                                           |      | Smoking, current                                                | Smoked $\geq 1$ cigarette/day for up to 1 month before interview.                                 |
| Li_2017 <sup>101</sup>            | China           | MI: 267;<br>$\leq 44$ y<br><br>No MI: 247;<br>$\leq 44$ y | M    | DM (type 1 or type 2)                                           | Fasting glucose $\geq 7.0$ mmol/L, 2-hour postprandial glucose $> 11.1$ mmol/L, or on medication. |
|                                   |                 |                                                           |      | Family history of cardiac disease                               | CHD in first degree relative (men $< 55$ years; women $< 65$ years).                              |
|                                   |                 |                                                           |      | Hypertension                                                    | BP $\geq 140/90$ mmHg and/or on medication.                                                       |
|                                   |                 |                                                           |      | Smoking, current                                                | Smoking within 1 month of hospital admission.                                                     |
|                                   |                 |                                                           |      | Alcohol, current                                                | Not reported.                                                                                     |
| Lima-Neto_2013 <sup>102</sup>     | Brazil          | MI: 102;<br>$< 45$ y<br><br>No MI: 108;<br>$< 45$ y       | M; F | Alcohol, current                                                | Daily intake $\geq 1$ g beer, wine, or distilled spirits.                                         |
| Liu_2007 <sup>103</sup>           | Taiwan          | MI: 200;<br>$< 45$ y<br><br>No MI: 200;<br>$< 45$ y       | M; F | DM (type 1 or type 2)                                           | Fasting glucose $> 126$ mg/dL or on medication.                                                   |
|                                   |                 |                                                           |      | Family history of cardiac disease                               | Premature-onset MI or sudden cardiac death among first-degree relatives.                          |
|                                   |                 |                                                           |      | Hypertension                                                    | BP $> 140/90$ mmHg on three occasions or on medication.                                           |
|                                   |                 |                                                           |      | Smoking, current                                                | Current smoker.                                                                                   |
| Maddhuri_2018 <sup>104</sup>      | India           | MI: 300;<br>20y–40y<br><br>No MI: 300;<br>20y–40y         | M; F | Family history of cardiac disease                               | Family history of CAD.                                                                            |
|                                   |                 |                                                           |      | Smoking, current                                                | ---                                                                                               |
|                                   |                 |                                                           |      | Alcohol, current                                                | ---                                                                                               |
| Maino_2016 <sup>105</sup>         | The Netherlands | MI: 218;<br>18y–50y<br><br>No MI: 743;<br>18y–50y         | F    | Alcohol, current                                                | ---                                                                                               |
| Malinauskiene_2010 <sup>106</sup> | Lithuania       | MI: 122;<br>35y–61y<br><br>No MI: 371;<br>35y–61y         | F    | BMI $\geq 30$ kg/m <sup>2</sup> versus $< 30$ kg/m <sup>2</sup> | BMI $\geq 30$ kg/m <sup>2</sup> .                                                                 |
|                                   |                 |                                                           |      | Hypertension                                                    | BP $\geq 140/90$ mmHg.                                                                            |
|                                   |                 |                                                           |      | Smoking, current                                                | Current smoker.                                                                                   |
| Medina_2008 <sup>107</sup>        | Spain           | MI: 689;<br>$< 51$ y                                      | M; F | BMI $\geq 30$ kg/m <sup>2</sup> versus $< 30$ kg/m <sup>2</sup> | BMI $\geq 30$ kg/m <sup>2</sup> .                                                                 |
|                                   |                 |                                                           |      | DM (type 1 or type 2)                                           | Prior diagnosis, fasting glucose $> 126$ mg/dL, or medication for DM.                             |

| Study                         | Countries | Number of participants; age                              | Sex  | Risk factor for current meta-analysis                  | Risk factor definition provided by study authors                                     |
|-------------------------------|-----------|----------------------------------------------------------|------|--------------------------------------------------------|--------------------------------------------------------------------------------------|
|                               |           | No MI: 697;<br><51y                                      |      | Dyslipidemia, not specified                            | Prior diagnosis, total cholesterol >250 mg/dL and/or triglycerides >175 mg/dL.       |
|                               |           |                                                          |      | Hypertension                                           | Prior diagnosis, BP ≥140/90 mmHg on ≥2 separate occasions, or on medication.         |
|                               |           |                                                          |      | Smoking, current                                       | Current/prior smoking in previous 10 years.                                          |
| Montes_2005 <sup>32</sup>     | Italy     | MI: 165;<br><45y<br><br>No MI: 165;<br>age matched (±3y) | F    | HDL/total cholesterol ratio                            | Risk of MI per 0.1 unit drop in ratio.                                               |
| Negri_1995 <sup>108</sup>     | Italy     | MI: 542;<br><50y<br><br>No MI: 705;<br><50y              | M; F | BMI ≥25 kg/m <sup>2</sup> versus <25 kg/m <sup>2</sup> | BMI ≥ 25 versus <25.                                                                 |
|                               |           |                                                          |      | Diabetes (type 1 or type 2)                            | Self-reported.                                                                       |
|                               |           |                                                          |      | Total cholesterol >200 mg/dL                           | ≥226 mg/dL versus <188 mg/dL. Measured during hospitalization.                       |
|                               |           |                                                          |      | Fam history of cardiac disease                         | At least 1 first-degree relative with AMI before age 65 years.                       |
|                               |           |                                                          |      | Hypertension                                           | Self-reported.                                                                       |
| Nora_1980 <sup>109</sup>      | USA       | MI: 207;<br>35y–54y<br><br>No MI: 621;<br>35y–54y        | M; F | Total cholesterol >200 mg/dL                           | Total cholesterol >220 mg/dL.                                                        |
|                               |           |                                                          |      | Triglycerides >150 mg/dL                               | Triglycerides >200 mg/dL.                                                            |
|                               |           |                                                          |      | Family history of cardiac disease                      | First degree relative <65 years with ischemic heart disease.                         |
|                               |           |                                                          |      | Hypertension                                           | BP ≥140/90 mmHg.                                                                     |
| Oliveira_2009A <sup>110</sup> | Portugal  | MI: 257;<br>≤45y<br><br>No MI: 256;<br>≤45y              | M    | Smoking, current                                       | Smoking > half-pack per day.                                                         |
|                               |           |                                                          |      | BMI ≥30 kg/m <sup>2</sup> versus <30 kg/m <sup>2</sup> | BMI ≥30 kg/m <sup>2</sup> .                                                          |
| Oliveira_2009B <sup>30</sup>  | Portugal  | MI: 270;<br>≤45y<br><br>No MI: 289;<br>≤45y              | M    | BMI ≥25 kg/m <sup>2</sup> versus <25 kg/m <sup>2</sup> | BMI 25-29.9 kg/m <sup>2</sup> .                                                      |
|                               |           |                                                          |      | Obesity, waist-to-hip ratio                            | Ratio >0.90 versus ≤0.90.                                                            |
|                               |           |                                                          |      | DM (type 1 or type 2)                                  | Self-reported.                                                                       |
|                               |           |                                                          |      | Dyslipidemia, not specified                            | Self-reported.                                                                       |
|                               |           |                                                          |      | Family history of cardiac disease                      | At least one first degree relative with MI or sudden death.                          |
|                               |           |                                                          |      | Hypertension                                           | Self-reported.                                                                       |
|                               |           |                                                          |      | Smoking, current                                       | Current smoker.                                                                      |
| Palacin_2011 <sup>111</sup>   | Spain     | MI: 500;<br><55y<br><br>No MI: 500;                      | M    | Alcohol, current                                       | Any alcohol intake.                                                                  |
|                               |           |                                                          |      | Alcohol, never                                         | Never versus 0.1–30.0 g/day.                                                         |
|                               |           |                                                          |      | DM (type 1 or type 2)                                  | Prior diagnosis, fasting glucose >15 mmol/L on >2 occasions, or on medication.       |
|                               |           |                                                          |      | Dyslipidemia, not specified                            | Prior diagnosis, fasting total cholesterol >250 mg/dL, or lipid-lowering medication. |

| Study                             | Countries | Number of participants; age                       | Sex  | Risk factor for current meta-analysis                  | Risk factor definition provided by study authors                                                                                                                                       |
|-----------------------------------|-----------|---------------------------------------------------|------|--------------------------------------------------------|----------------------------------------------------------------------------------------------------------------------------------------------------------------------------------------|
|                                   |           | <55y                                              |      | Hypertension                                           | Prior diagnosis, sBP >140 mmHg and/or dBP >90 mmHg, or on medication.                                                                                                                  |
|                                   |           |                                                   |      | Smoking, current                                       | Current smoker.                                                                                                                                                                        |
| Panagiotakos_2008 <sup>112</sup>  | Greece    | MI: 100;<br><36y<br><br>No MI: 100;<br><36y       | M; F | Family history of cardiac disease                      | Premature CHD in first-degree relatives (men <55 years; women <65 years) including MI, sudden death, coronary arteries bypass grafting procedure or percutaneous coronary angioplasty. |
| Qian_2015 <sup>31</sup>           | China     | MI: 341;<br>≤40y<br><br>No MI: 341;<br>≤40y       | M; F | BMI ≥30 kg/m <sup>2</sup> versus <30 kg/m <sup>2</sup> | Obesity, not described.                                                                                                                                                                |
|                                   |           |                                                   |      | DM (type 1 or type 2)                                  | Per American Diabetes Association guidelines.                                                                                                                                          |
|                                   |           |                                                   |      | Dyslipidemia, not specified                            | Per National Cholesterol Education Program Adult Treatment Panel III Guidelines.                                                                                                       |
|                                   |           |                                                   |      | Family history of cardiac disease                      | ---                                                                                                                                                                                    |
|                                   |           |                                                   |      | Hypertension                                           | Per 7 <sup>th</sup> Report of the Joint National Committee on Prevention, Detection, Evaluation, and Treatment of High Blood Pressure.                                                 |
| Rallidis_2017A <sup>113</sup>     | Greece    | MI: 327;<br>≤35y<br><br>No MI: 167;<br>≤35y       | M; F | DM (type 1 or type 2)                                  | Fasting glucose >125 mg/dL or on medication.                                                                                                                                           |
|                                   |           |                                                   |      | Hypertension                                           | BP ≥140/90 mmHg or on medication.                                                                                                                                                      |
|                                   |           |                                                   |      | Smoking, current                                       | Current smoker.                                                                                                                                                                        |
| Rallidis_2017B <sup>114</sup>     | Greece    | MI: 255;<br>≤35y<br><br>No MI: 400;<br>≤35y       | M; F | BMI ≥30 kg/m <sup>2</sup> versus <30 kg/m <sup>2</sup> | BMI ≥30 kg/m <sup>2</sup> .                                                                                                                                                            |
|                                   |           |                                                   |      | Dyslipidemia, not specified                            | Total cholesterol >200 mg/dL or cholesterol lowering medication.                                                                                                                       |
| Reiner_2007 <sup>115</sup>        | USA       | MI: 264;<br>23y–59y<br><br>No MI: 407;<br>18y–59y | F    | Dyslipidemia, not specified                            | Self-reported.                                                                                                                                                                         |
|                                   |           |                                                   |      | Hypertension                                           | Self-reported.                                                                                                                                                                         |
|                                   |           |                                                   |      | Smoking, current                                       | Current smoker.                                                                                                                                                                        |
| Rivera-Garcia_2013 <sup>116</sup> | Mexico    | MI: 275;<br>≤45y<br><br>No MI: 278;<br>≤45y       | M; F | DM (type 1 or type 2)                                  | Prior diagnosis or fasting glucose >126 mg/dL.                                                                                                                                         |
|                                   |           |                                                   |      | Dyslipidemia, not specified                            | Cholesterol level of 200 mg/dL or lipid-lowering medication.                                                                                                                           |
|                                   |           |                                                   |      | Family history of cardiac disease                      | CAD or sudden death in a first degree relative (men <55 years; women <65 years).                                                                                                       |

| Study                          | Countries                 | Number of participants; age                        | Sex  | Risk factor for current meta-analysis                  | Risk factor definition provided by study authors                                                                                                                                                         |
|--------------------------------|---------------------------|----------------------------------------------------|------|--------------------------------------------------------|----------------------------------------------------------------------------------------------------------------------------------------------------------------------------------------------------------|
|                                |                           |                                                    |      | Hypertension                                           | Per European Society Cardiology criteria or on medication.                                                                                                                                               |
|                                |                           |                                                    |      | Smoking, current                                       | Current or quit within 12 months prior to MI.                                                                                                                                                            |
| Roldan_2005 <sup>117</sup>     | Spain                     | MI: 281;<br><45y<br><br>No MI: 550;<br><45y        | M; F | DM (type 1 or type 2)                                  | Not reported.                                                                                                                                                                                            |
|                                |                           |                                                    |      | Hypertension                                           | sBP >140 mmHg and/or dBP >90 mmHg on repeat observations over 3 months or, if no blood pressure values were available when the participant was under treatment with medication for chronic hypertension. |
|                                |                           |                                                    |      | Sex                                                    | Males versus females.                                                                                                                                                                                    |
|                                |                           |                                                    |      | Smoking, current                                       | >10 cigarettes/day.                                                                                                                                                                                      |
| Rosenberg_1980C <sup>118</sup> | USA                       | MI: 477;<br>30y–49y<br><br>No MI: 1832;<br>30y–49y | F    | DM (type 1 or type 2)                                  | Information obtained from patient using standard questionnaire for medical and surgical history.                                                                                                         |
|                                |                           |                                                    |      | Hypertension                                           | Information obtained from patient using standard questionnaire for medical and surgical history.                                                                                                         |
|                                |                           |                                                    |      | Race                                                   | White versus other                                                                                                                                                                                       |
| Rosenberg_1981 <sup>119</sup>  | USA                       | MI: 511;<br>30y–49y<br><br>No MI: 899;<br>30y–49y  | F    | Alcohol, current                                       | Alcohol <12 months prior to admission versus never.                                                                                                                                                      |
|                                |                           |                                                    |      | Alcohol, prior                                         | Alcohol ≥12 months prior to admission) versus never.                                                                                                                                                     |
| Rosenberg_1983 <sup>120</sup>  | USA                       | MI: 249;<br>25y–49y                                | F    | BMI ≥30 kg/m <sup>2</sup> versus <30 kg/m <sup>2</sup> | BMI ≥35 kg/m <sup>2</sup> versus 21–27 kg/m <sup>2</sup> .                                                                                                                                               |
|                                |                           | No MI: 686;<br>25y–49y                             |      | Total cholesterol >200 mg/dL                           | Total cholesterol >200 mg/dL.                                                                                                                                                                            |
|                                |                           | MI: 254;<br>25y–49y                                |      |                                                        |                                                                                                                                                                                                          |
|                                |                           | No MI: 798;<br>25y–49y                             |      |                                                        |                                                                                                                                                                                                          |
| MI: 254;<br>25y–49y            | HDL cholesterol <60 mg/dL | HDL cholesterol <60 mg/dL.                         |      |                                                        |                                                                                                                                                                                                          |
| No MI: 793;<br>25y–49y         |                           |                                                    |      |                                                        |                                                                                                                                                                                                          |



| Study                         | Countries | Number of participants; age                                                                                                                                                                                                                                                                                                                                                                                                     | Sex  | Risk factor for current meta-analysis                        | Risk factor definition provided by study authors                                               |                  |   |                                                              |                                             |
|-------------------------------|-----------|---------------------------------------------------------------------------------------------------------------------------------------------------------------------------------------------------------------------------------------------------------------------------------------------------------------------------------------------------------------------------------------------------------------------------------|------|--------------------------------------------------------------|------------------------------------------------------------------------------------------------|------------------|---|--------------------------------------------------------------|---------------------------------------------|
|                               |           | MI: 255;<br>25y–49y<br><br>No MI: 802;<br>25y–49y                                                                                                                                                                                                                                                                                                                                                                               |      | Family history of cardiac disease                            | MI or stroke in first-degree relative <60 years.                                               |                  |   |                                                              |                                             |
| Rosenberg_1985 <sup>121</sup> | USA       | MI: 554;<br><50y<br><br>No MI: 1840;<br><50y                                                                                                                                                                                                                                                                                                                                                                                    | F    | Smoking, prior                                               | Ex-smoker versus never.                                                                        |                  |   |                                                              |                                             |
|                               |           |                                                                                                                                                                                                                                                                                                                                                                                                                                 |      | Smoking, current                                             | Current smoker.                                                                                |                  |   |                                                              |                                             |
| Russo_2012 <sup>122</sup>     | Italy     | MI: 174;<br>18y–40y<br><br>No MI: 142;<br>age ( $\pm 1$ y) matched<br>MI: 196;<br>18y–40y<br><br>No MI: 164;<br>age ( $\pm 1$ y) matched<br>MI: 191;<br>18y–40y<br><br>No MI: 160;<br>age ( $\pm 1$ y) matched<br>MI: 196;<br>18y–40y<br><br>No MI: 85;<br>age ( $\pm 1$ y) matched<br>MI: 196;<br>18y–40y<br><br>No MI: 164;<br>age ( $\pm 1$ y) matched<br>MI: 189;<br>18y–40y<br><br>No MI: 164;<br>age ( $\pm 1$ y) matched | M; F | BMI $\geq 25$ kg/m <sup>2</sup> versus <25 kg/m <sup>2</sup> | BMI >25 kg/m <sup>2</sup> .                                                                    |                  |   |                                                              |                                             |
|                               |           |                                                                                                                                                                                                                                                                                                                                                                                                                                 |      | DM (type 1 or type 2)                                        | Medical history, fasting glucose >126 mg/dL on two occasions or glucose overload test.         |                  |   |                                                              |                                             |
|                               |           |                                                                                                                                                                                                                                                                                                                                                                                                                                 |      | Total cholesterol >200 mg/dL                                 | Total cholesterol >220 mg/dL.                                                                  |                  |   |                                                              |                                             |
|                               |           |                                                                                                                                                                                                                                                                                                                                                                                                                                 |      | Family history of cardiac disease                            | Family history of CHD or atherosclerotic vascular disease in men <55 years or women <65 years. |                  |   |                                                              |                                             |
|                               |           |                                                                                                                                                                                                                                                                                                                                                                                                                                 |      | Hypertension                                                 | BP $\geq 140/90$ mmHg or on medication.                                                        |                  |   |                                                              |                                             |
|                               |           |                                                                                                                                                                                                                                                                                                                                                                                                                                 |      | Smoking, current                                             | Current smokers.                                                                               |                  |   |                                                              |                                             |
|                               |           |                                                                                                                                                                                                                                                                                                                                                                                                                                 |      | Saigo_2001 <sup>123</sup>                                    | Japan                                                                                          | MI: 140;<br><45y | M | BMI $\geq 25$ kg/m <sup>2</sup> versus <25 kg/m <sup>2</sup> | BMI $\geq 25$ kg/m <sup>2</sup> .           |
|                               |           |                                                                                                                                                                                                                                                                                                                                                                                                                                 |      |                                                              |                                                                                                |                  |   | DM (type 1 or type 2)                                        | Glucose $\geq 127$ mg/dL and/or medication. |

| Study                            | Countries       | Number of participants; age                       | Sex  | Risk factor for current meta-analysis                        | Risk factor definition provided by study authors                                                       |
|----------------------------------|-----------------|---------------------------------------------------|------|--------------------------------------------------------------|--------------------------------------------------------------------------------------------------------|
|                                  |                 | No MI: 150;<br><45y                               |      | Dyslipidemia, not specified                                  | Total cholesterol $\geq 220$ mg/dL or triglycerides $\geq 150$ mg/dL and/or lipid-lowering medication. |
|                                  |                 |                                                   |      | Hypertension                                                 | sBP $\geq 140$ mmHg and/or dBP $\geq 95$ mmHg or on medication.                                        |
|                                  |                 |                                                   |      | Smoking, current                                             | Not reported.                                                                                          |
| Sala_2001 <sup>124</sup>         | Italy           | MI: 125;<br><45y<br><br>No MI: 108;<br><45y       | M    | BMI $\geq 25$ kg/m <sup>2</sup> versus <25 kg/m <sup>2</sup> | BMI >27 kg/m <sup>2</sup> versus $\leq 27$ kg/m <sup>2</sup>                                           |
| Sampaio_2007 <sup>125</sup>      | Brazil          | MI: 121;<br><40y<br><br>No MI: 111;<br><40y       | M; F | BMI $\geq 30$ kg/m <sup>2</sup> versus <30 kg/m <sup>2</sup> | BMI $\geq 30$ kg/m <sup>2</sup> .                                                                      |
|                                  |                 |                                                   |      | DM (type 1 or type 2)                                        | Fasting glucose >126 mg/dL or on medication.                                                           |
|                                  |                 |                                                   |      | LDL cholesterol, high, not specified                         | High LDL cholesterol, but not described.                                                               |
|                                  |                 |                                                   |      | Family history of cardiac disease                            | First degree relative (men <55 years; women <65 years) with MI.                                        |
|                                  |                 |                                                   |      | Hypertension                                                 | BP >140/90 mmHg or on medication.                                                                      |
|                                  |                 |                                                   |      | Race                                                         | White versus other.                                                                                    |
|                                  |                 |                                                   |      | Smoking, current                                             | Smokes $\geq 3$ cigarettes/day.                                                                        |
| Sandkamp_1990 <sup>126</sup>     | Germany         | MI: 509;<br><46y<br><br>No MI: 1053;<br><46y      | M    | BMI $\geq 30$ kg/m <sup>2</sup> versus <30 kg/m <sup>2</sup> | BMI >30 kg/m <sup>2</sup> .                                                                            |
| Sastry_2006 <sup>127</sup>       | UK              | MI: 101;<br>19y–39y<br><br>No MI: 101;<br>19y–39y | M; F | BMI $\geq 25$ kg/m <sup>2</sup> versus <25 kg/m <sup>2</sup> | Elevated BMI, cut-off not reported.                                                                    |
|                                  |                 |                                                   |      | DM (type 1 or type 2)                                        | ---                                                                                                    |
|                                  |                 |                                                   |      | Dyslipidemia, not specified                                  | Total cholesterol, but not described.                                                                  |
|                                  |                 |                                                   |      | Hypertension                                                 | ---                                                                                                    |
|                                  |                 |                                                   |      | Smoking                                                      | ---                                                                                                    |
| Schargrotsky_1994 <sup>128</sup> | Argentina       | MI: 127;<br>30y–65y<br><br>No MI: 127;<br>30y–65y | F    | DM (type 1 or type 2)                                        | Self-reported history.                                                                                 |
|                                  |                 |                                                   |      | Family history of cardiac disease                            | Self-reported family history of CHD.                                                                   |
|                                  |                 |                                                   |      | Hypertension                                                 | Self-reported diagnosis.                                                                               |
|                                  |                 |                                                   |      | Smoking, prior                                               | Ex-smoker.                                                                                             |
|                                  |                 |                                                   |      | Smoking, current                                             | Current smoker.                                                                                        |
| Siegerink_2012 <sup>129</sup>    | The Netherlands | MI: 248;<br>18y–50y<br><br>No MI: 925;<br>18y–50y | F    | DM (type 1 or type 2)                                        | Self-reported diagnosis or on medication.                                                              |
|                                  |                 |                                                   |      | Dyslipidemia, not specified                                  | Self-reported hypercholesterolemia or on medication.                                                   |
|                                  |                 |                                                   |      | Family history of cardiac disease                            | MI <60 years in first degree relative.                                                                 |
|                                  |                 |                                                   |      | Hypertension                                                 | Self-reported diagnosis or on medication.                                                              |
|                                  |                 |                                                   |      | Race                                                         | White versus other.                                                                                    |

| Study                         | Countries       | Number of participants; age                                                           | Sex  | Risk factor for current meta-analysis                        | Risk factor definition provided by study authors |
|-------------------------------|-----------------|---------------------------------------------------------------------------------------|------|--------------------------------------------------------------|--------------------------------------------------|
|                               |                 |                                                                                       |      | Smoking, current                                             | Smoking in the year prior to MI.                 |
| Singh_2010 <sup>130</sup>     | India           | MI: 108;<br><55 males;<br><65 females<br><br>No MI: 108;<br><55 males;<br><65 females | M; F | BMI $\geq 25$ kg/m <sup>2</sup> versus <25 kg/m <sup>2</sup> | BMI $\geq 25$ kg/m <sup>2</sup> .                |
|                               |                 |                                                                                       |      | DM (type 1 or type 2)                                        | ---                                              |
|                               |                 |                                                                                       |      | Hypertension                                                 | ---                                              |
|                               |                 |                                                                                       |      | Smoking, current                                             | ---                                              |
| Sniderman_2016 <sup>33</sup>  | see Yusuf_2004  | MI: 2347;<br>18y–50y<br><br>No MI: 3438;<br>18y–50y                                   | M; F | Total cholesterol, per SD change                             | Laboratory measurement of total cholesterol.     |
|                               |                 |                                                                                       |      | HDL cholesterol, per SD change                               | Laboratory measurement of HDL cholesterol.       |
|                               |                 |                                                                                       |      | LDL cholesterol, per SD change                               | Laboratory measurement of LDL cholesterol.       |
|                               |                 |                                                                                       |      | Non-HDL cholesterol, per SD change                           | Calculated from total and HDL cholesterol.       |
|                               |                 |                                                                                       |      | Apo A1, per SD change                                        | Laboratory measurement of Apo A1.                |
|                               |                 |                                                                                       |      | Apo B, per SD change                                         | Laboratory measurement of Apo B.                 |
| Tanis_2006 <sup>131</sup>     | The Netherlands | MI: 200;<br>18y–49y<br><br>No MI: 626;<br>18y–49y                                     | F    | BMI $\geq 25$ kg/m <sup>2</sup> versus <25 kg/m <sup>2</sup> | BMI $\geq 27.3$ kg/m <sup>2</sup> .              |
|                               |                 |                                                                                       |      | C-reactive protein                                           | 0.50–1.34 mg/L.                                  |
|                               |                 |                                                                                       |      |                                                              | $\geq 4.97$ mg/L.                                |
| Vaccarino_2018 <sup>132</sup> | USA             | MI: 150;<br>$\leq 61$ y<br><br>No MI: 58;<br>$\leq 61$ y                              | F    | Race                                                         | Black versus other.                              |
| Walker_1967 <sup>133</sup>    | USA             | MI: 100;<br><40y<br><br>No MI: 72;<br><40y                                            | M    | Family history of cardiac disease                            | Self-reported.                                   |
|                               |                 |                                                                                       |      | Hypertension                                                 | Self-reported.                                   |
|                               |                 |                                                                                       |      | Race                                                         | Black versus other.                              |
|                               |                 |                                                                                       |      | Smoking, current                                             | >1 pack/day.                                     |
|                               |                 |                                                                                       |      | Alcohol, current                                             | >2 oz. whiskey/day.                              |
| Westover_2008 <sup>134</sup>  | USA             | MI: 11011;<br>18y–44y<br><br>No MI: 3137154;<br>18y–44y                               | M; F | BMI $\geq 30$ kg/m <sup>2</sup> versus <30 kg/m <sup>2</sup> | ICD code for obesity.                            |
|                               |                 |                                                                                       |      | DM (type 1 or type 2)                                        | ICD code for diabetes.                           |
|                               |                 |                                                                                       |      | Dyslipidemia, not specified                                  | ICD code for lipid disorders.                    |
|                               |                 |                                                                                       |      | Hypertension, current                                        | ICD code for hypertension.                       |
|                               |                 |                                                                                       |      | Smoking, current                                             | ICD code for smoking.                            |
|                               |                 |                                                                                       |      | Alcohol, current                                             | ICD code for alcohol abuse.                      |

| <b>Study</b>              | <b>Countries</b>                                                           | <b>Number of participants; age</b>                                                 | <b>Sex</b> | <b>Risk factor for current meta-analysis</b> | <b>Risk factor definition provided by study authors</b>                     |
|---------------------------|----------------------------------------------------------------------------|------------------------------------------------------------------------------------|------------|----------------------------------------------|-----------------------------------------------------------------------------|
| Yamac_2018 <sup>135</sup> | Turkey                                                                     | MI: 108;<br><45y<br><br>No MI: 91;<br><45y                                         | M; F       | Family history of cardiac disease            | Not reported.                                                               |
| Yusuf_2004 <sup>20</sup>  | Argentina,<br>Australia,<br>Bahrain,<br>Bangladesh,<br>Benin,<br>Botswana, | MI: 12461;<br>≤55y males;<br>≤65 females<br><br>No MI: 14637;<br>age (±5y) matched | M; F       | Obesity, waist-to-hip ratio                  | Waist-to-hip ratio.                                                         |
|                           |                                                                            |                                                                                    |            | DM (type 1 or type 2)                        | Self-reported.                                                              |
|                           |                                                                            |                                                                                    |            | ApoB/ApoA1                                   | Top versus lowest quartile.                                                 |
|                           |                                                                            |                                                                                    |            | Hypertension                                 | Self-reported.                                                              |
|                           |                                                                            |                                                                                    |            | Smoking, current                             | Smoked any tobacco in prior 12 months and those who quit within prior year. |

| Study                      | Countries                                                                                                                                                                                                                                                                                                                                                                                                                     | Number of participants; age                     | Sex  | Risk factor for current meta-analysis                                                 | Risk factor definition provided by study authors                                                                  |
|----------------------------|-------------------------------------------------------------------------------------------------------------------------------------------------------------------------------------------------------------------------------------------------------------------------------------------------------------------------------------------------------------------------------------------------------------------------------|-------------------------------------------------|------|---------------------------------------------------------------------------------------|-------------------------------------------------------------------------------------------------------------------|
|                            | Brazil, Cameroon, Canada, Chile, China, Colombia, Croatia, Czech Republic, Egypt, Germany, Greece, Guatemala, Hong Kong, Hungary, India, Italy, Iran, Israel, Japan, Kenya, Kuwait, Malaysia, Mexico, Mozambique, Nepal, New Zealand, Nigeria, Oman, Pakistan, Philippines, Poland, Portugal, Qatar, Russia, Seychelles, Singapore, Spain, South Africa, Sri Lanka, Sweden, Thailand, The Netherlands, UAE, UK, USA, Zimbabwe |                                                 |      | Alcohol, current                                                                      | Use ≥3 times/week.                                                                                                |
| Zoller_2015 <sup>136</sup> | Sweden                                                                                                                                                                                                                                                                                                                                                                                                                        | MI: 329; 18y–38y<br><br>No MI: 1970630; 18y–38y | M; F | DM (type 1 or type 2)<br>Family history of cardiac disease<br><br>Hypertension<br>Sex | ICD code for diabetes.<br>ICD code for family history.<br><br>ICD code for hypertension.<br>Males versus females. |

Abbreviations: apo: apolipoprotein; BMI: body-mass index; BP: blood pressure; CAD: coronary artery disease; CHD: coronary heart disease; dBp: diastolic blood pressure; DM: diabetes mellitus; F: female; HbA1c: hemoglobin A1c; HDL: high-density lipoprotein; ICD: international classification of diseases; LDL: low-density lipoprotein; M: male; MI: myocardial infarction; sBP: systolic blood pressure; UAE: United Arab Emirates; UK: United Kingdom; USA: United States of America; WHO: World Health Organization

**Supplemental Table 5: Number of participants per risk factor, categorized by risk of bias**

| Risk factor                               | no. studies<br>(no. participants) | Risk of bias       |                         |                    |                         |                    |                         |
|-------------------------------------------|-----------------------------------|--------------------|-------------------------|--------------------|-------------------------|--------------------|-------------------------|
|                                           |                                   | Low                |                         | Medium             |                         | High               |                         |
|                                           |                                   | no. studies<br>(%) | no. participants<br>(%) | no. studies<br>(%) | no. participants<br>(%) | no. studies<br>(%) | no. participants<br>(%) |
| <b>Demographics</b>                       |                                   |                    |                         |                    |                         |                    |                         |
| Sex (males versus females)                | 3 (n=1972026)                     | 3 (100)            | 1972026 (100)           | 0 (0)              | 0 (0)                   | 0 (0)              | 0 (0)                   |
| Race (White versus other)                 | 5 (n=5874)                        | 0 (0)              | 0 (0)                   | 5 (100)            | 5874 (100)              | 0 (0)              | 0 (0)                   |
| Race (Black versus other)                 | 3 (n=7641)                        | 0 (0)              | 0 (0)                   | 2 (67)             | 380 (5)                 | 1 (33)             | 7261 (95)               |
| Family history of cardiac disease         | 35 (n=1990987)                    | 0 (0)              | 0 (0)                   | 10 (29)            | 1977134 (99.3)          | 25 (71)            | 13853 (0.7)             |
| <b>Lifestyle risk factors</b>             |                                   |                    |                         |                    |                         |                    |                         |
| Smoking, current                          | 48 (n=3209848)                    | 0 (0)              | 0 (0)                   | 11 (23)            | 3181092 (99.1)          | 37 (77)            | 28756 (0.9)             |
| Smoking, prior                            | 12 (n=8879)                       | 0 (0)              | 0 (0)                   | 2 (17)             | 2435 (27.4)             | 10 (83)            | 6444 (72.6)             |
| Alcohol, current                          | 13 (n=3187345)                    | 0 (0)              | 0 (0)                   | 4 (31)             | 3177207 (99.7)          | 9 (69)             | 10138 (0.3)             |
| Alcohol, prior                            | 2 (n=4561)                        | 0 (0)              | 0 (0)                   | 2 (100)            | 4561                    | 0 (0)              | 0 (0)                   |
| Alcohol, never                            | 1 (n=559)                         | 0 (0)              | 0 (0)                   | 1 (100)            | 559                     | 0 (0)              | 0 (0)                   |
| <b>Clinical risk factors</b>              |                                   |                    |                         |                    |                         |                    |                         |
| Diabetes (type 1 or type 2)               | 42 (n=5174321)                    | 4 (10)             | 2610 (0.1)              | 22 (52)            | 5160352 (99.7)          | 16 (38)            | 11131 (0.2)             |
| Hypertension                              | 45 (n=5177526)                    | 7 (16)             | 7159 (0.1)              | 22 (49)            | 5156422 (99.6)          | 16 (36)            | 13945 (0.3)             |
| Dyslipidemia, not specified               | 21 (n=3163027)                    | 4 (19)             | 5989 (0.2)              | 9 (43)             | 3152809 (99.7)          | 8 (38)             | 4229 (0.1)              |
| BMI ≥30 versus <30 kg/m <sup>2</sup>      | 16 (n=4382036)                    | 5 (31)             | 1225351 (28)            | 10 (63)            | 3156003 (72)            | 1 (6)              | 682 (0.02)              |
| BMI ≥25 versus <25 kg/m <sup>2</sup>      | 15 (n=1821224)                    | 7 (47)             | 1815192 (99.7)          | 6 (40)             | 5602 (0.3)              | 2 (13)             | 430 (.02)               |
| <b>Biomarkers</b>                         |                                   |                    |                         |                    |                         |                    |                         |
| Total cholesterol >200 versus ≤200 mg/dL  | 8 (n=5129)                        | 1 (13)             | 1386 (27)               | 6 (75)             | 2996 (58)               | 1 (13)             | 747 (15)                |
| Total cholesterol, per SD increment       | 1 (n=5785)                        | 1 (100)            | 5785 (100)              | 0 (0)              | 0 (0)                   | 0 (0)              | 0 (0)                   |
| LDL cholesterol, high, not specified      | 2 (n=468)                         | 0 (0)              | 0 (0)                   | 1 (50)             | 236 (50.4)              | 1 (50)             | 232 (49.6)              |
| Triglycerides >150 versus ≤150 mg/dL      | 3 (n=1064)                        | 1 (33)             | 236 (22)                | 2 (67)             | 828 (78)                | 0 (0)              | 0 (0)                   |
| HDL cholesterol <60 versus ≥60 mg/dL      | 2 (n=1283)                        | 0 (0)              | 0 (0)                   | 2 (100)            | 1283 (100)              | 0 (0)              | 0 (0)                   |
| HDL/total cholesterol ratio, per 0.1 drop | 1 (n=1386)                        | 1 (100)            | 1386 (100)              | 0 (0)              | 0 (0)                   | 0 (0)              | 0 (0)                   |
| LDL cholesterol, per SD increment         | 1 (n=5785)                        | 1 (100)            | 5785 (100)              | 0 (0)              | 0 (0)                   | 0 (0)              | 0 (0)                   |
| HDL cholesterol, per SD increment         | 1 (n=5785)                        | 1 (100)            | 5785 (100)              | 0 (0)              | 0 (0)                   | 0 (0)              | 0 (0)                   |
| Non-HDL cholesterol, per SD increment     | 1 (n=5785)                        | 1 (100)            | 5785 (100)              | 0 (0)              | 0 (0)                   | 0 (0)              | 0 (0)                   |
| Apo A1, per SD increment                  | 1 (n=5785)                        | 1 (100)            | 5785 (100)              | 0 (0)              | 0 (0)                   | 0 (0)              | 0 (0)                   |
| Apo B, per SD increment                   | 1 (n=5785)                        | 1 (100)            | 5785 (100)              | 0 (0)              | 0 (0)                   | 0 (0)              | 0 (0)                   |
| ApoB/ApoA1, top vs. lowest quintile       | 1 (n=27098)                       | 1 (100)            | 27098 (100)             | 0 (0)              | 0 (0)                   | 0 (0)              | 0 (0)                   |
| Total cholesterol, top vs. lowest tertile | 1 (n=5688055)                     | 0 (0)              | 0 (0)                   | 1 (100)            | 5688055 (100)           | 0 (0)              | 0 (0)                   |
| HDL cholesterol, top vs. lowest tertile   | 1 (n=5688055)                     | 0 (0)              | 0 (0)                   | 1 (100)            | 5688055 (100)           | 0 (0)              | 0 (0)                   |
| LDL cholesterol, top vs. lowest tertile   | 1 (n=5688055)                     | 0 (0)              | 0 (0)                   | 1 (100)            | 5688055 (100)           | 0 (0)              | 0 (0)                   |
| Triglycerides, top vs. lowest tertile     | 1 (n=5688055)                     | 0 (0)              | 0 (0)                   | 1 (100)            | 5688055 (100)           | 0 (0)              | 0 (0)                   |

Estimated number of participants includes MI and MI-free groups. Percentages may not add up to 100 due to rounding. Risk of bias determined using criteria described in supplementary file 3.

Abbreviations: Apo: apolipoprotein; BMI: body-mass index; CRP: C-reactive protein; HDL: high-density lipoprotein; LDL: low-density lipoprotein; SD: standard deviation.

**Supplemental Table 6: Risk of bias of individual risk factors and adjusted covariates in multivariable models**

| Study                         | Risk factor in meta-analysis                                    | Covariates, if adjusted                                                                                                                                                                                                                                                         | Risk of bias |
|-------------------------------|-----------------------------------------------------------------|---------------------------------------------------------------------------------------------------------------------------------------------------------------------------------------------------------------------------------------------------------------------------------|--------------|
| Ambroziak_2018 <sup>66</sup>  | DM (type 1 or type 2)                                           | ---                                                                                                                                                                                                                                                                             | medium       |
|                               | Family history of cardiac disease                               | ---                                                                                                                                                                                                                                                                             | high         |
|                               | Hypertension                                                    | ---                                                                                                                                                                                                                                                                             | medium       |
|                               | Smoking, current                                                | ---                                                                                                                                                                                                                                                                             | high         |
| Antoniades_2005 <sup>67</sup> | DM (type 1 or type 2)                                           | ---                                                                                                                                                                                                                                                                             | high         |
|                               | Dyslipidemia, not specified                                     | ---                                                                                                                                                                                                                                                                             | high         |
|                               | Hypertension                                                    | ---                                                                                                                                                                                                                                                                             | high         |
|                               | Smoking, prior                                                  | ---                                                                                                                                                                                                                                                                             | high         |
|                               | Smoking, current                                                | ---                                                                                                                                                                                                                                                                             | high         |
| Arthes_1976 <sup>68</sup>     | DM (type 1 or type 2)                                           | ---                                                                                                                                                                                                                                                                             | medium       |
|                               | Race (White versus other)                                       | ---                                                                                                                                                                                                                                                                             | medium       |
| Bahrami_2015 <sup>69</sup>    | Dyslipidemia, not specified                                     | ---                                                                                                                                                                                                                                                                             | high         |
|                               | Family history of cardiac disease                               | ---                                                                                                                                                                                                                                                                             | high         |
|                               | Hypertension                                                    | ---                                                                                                                                                                                                                                                                             | high         |
|                               | Smoking, current                                                | ---                                                                                                                                                                                                                                                                             | high         |
| Balogh_2018 <sup>70</sup>     | DM (type 1 or type 2)                                           | ---                                                                                                                                                                                                                                                                             | medium       |
|                               | Dyslipidemia                                                    | ---                                                                                                                                                                                                                                                                             | medium       |
|                               | Family history of cardiac disease                               | ---                                                                                                                                                                                                                                                                             | high         |
|                               | Hypertension                                                    | ---                                                                                                                                                                                                                                                                             | medium       |
|                               | Smoking, prior                                                  | ---                                                                                                                                                                                                                                                                             | high         |
|                               | Smoking, current                                                | ---                                                                                                                                                                                                                                                                             | high         |
| Benze_2002 <sup>71</sup>      | DM (type 1 or type 2)                                           | ---                                                                                                                                                                                                                                                                             | high         |
|                               | Family history of cardiac disease                               | ---                                                                                                                                                                                                                                                                             | high         |
|                               | Smoking, current                                                | ---                                                                                                                                                                                                                                                                             | high         |
| Caimi_2018 <sup>72</sup>      | BMI $\geq 30$ kg/m <sup>2</sup> versus $< 30$ kg/m <sup>2</sup> | ---                                                                                                                                                                                                                                                                             | medium       |
|                               | BMI $\geq 25$ kg/m <sup>2</sup> versus $< 25$ kg/m <sup>2</sup> | ---                                                                                                                                                                                                                                                                             | medium       |
| Celik_2008 <sup>73</sup>      | DM (type 1 or type 2)                                           | backward stepwise logistic regression models with sex, obesity, smoking, hypertension, family history, total cholesterol, HDL cholesterol, LDL cholesterol, triglycerides, factor V Leiden, prothrombin G20210A and methylenetetrahydrofolate reductase (MTHFR) C677T mutation. | medium       |
|                               | BMI $\geq 30$ kg/m <sup>2</sup> versus $< 30$ kg/m <sup>2</sup> |                                                                                                                                                                                                                                                                                 | low          |
|                               | Total cholesterol $> 200$ mg/dL                                 |                                                                                                                                                                                                                                                                                 | medium       |
|                               | HDL cholesterol $< 60$ mg/dL                                    |                                                                                                                                                                                                                                                                                 | medium       |
|                               | LDL cholesterol, high, not specified                            |                                                                                                                                                                                                                                                                                 | medium       |
|                               | Triglycerides $> 150$ mg/dL                                     |                                                                                                                                                                                                                                                                                 | low          |
|                               | Family history of cardiac disease                               |                                                                                                                                                                                                                                                                                 | medium       |
|                               | Hypertension                                                    |                                                                                                                                                                                                                                                                                 | low          |
|                               | Sex (males versus females)                                      |                                                                                                                                                                                                                                                                                 | low          |
| Smoking, current              | medium                                                          |                                                                                                                                                                                                                                                                                 |              |
| Cetin_2017 <sup>74</sup>      | DM (type 1 or type 2)                                           | ---                                                                                                                                                                                                                                                                             | medium       |
|                               | Dyslipidemia, not specified                                     | ---                                                                                                                                                                                                                                                                             | medium       |
|                               | Family history of cardiac disease                               | ---                                                                                                                                                                                                                                                                             | high         |
|                               | Hypertension                                                    | ---                                                                                                                                                                                                                                                                             | medium       |



| Study                          | Risk factor in meta-analysis                                 | Covariates, if adjusted                                                                                                                                                                   | Risk of bias |
|--------------------------------|--------------------------------------------------------------|-------------------------------------------------------------------------------------------------------------------------------------------------------------------------------------------|--------------|
|                                | Smoking, current                                             | ---                                                                                                                                                                                       | high         |
| Choi_2018 <sup>75</sup>        | BMI $\geq 30$ kg/m <sup>2</sup> versus <30 kg/m <sup>2</sup> | age, household income, physical activity, tobacco and alcohol consumption, systolic blood pressure, fasting serum glucose level, total cholesterol level, and Charlson comorbidity index. | low          |
|                                | BMI $\geq 25$ kg/m <sup>2</sup> versus <25 kg/m <sup>2</sup> |                                                                                                                                                                                           | low          |
| Ciruzzi_1997 <sup>76</sup>     | Family history of cardiac disease                            | age, sex, cholesterolemia, smoking, DM, hypertension, BMI, education, social class, and physical exercise.                                                                                | medium       |
| Danesh_1999 <sup>77</sup>      | DM (type 1 or type 2)                                        | ---                                                                                                                                                                                       | high         |
|                                | Hypertension                                                 | ---                                                                                                                                                                                       | high         |
|                                | Smoking, current                                             | ---                                                                                                                                                                                       | high         |
| De Caterina_2011 <sup>78</sup> | Triglycerides >150 mg/dL                                     | ---                                                                                                                                                                                       | medium       |
|                                | Family history of cardiac disease                            | ---                                                                                                                                                                                       | high         |
|                                | Smoking, current                                             | ---                                                                                                                                                                                       | high         |
|                                | Alcohol, current                                             | ---                                                                                                                                                                                       | high         |
| Doggen_2006 <sup>79</sup>      | BMI $\geq 30$ kg/m <sup>2</sup> versus <30 kg/m <sup>2</sup> | ---                                                                                                                                                                                       | medium       |
|                                | BMI $\geq 25$ kg/m <sup>2</sup> versus <25 kg/m <sup>2</sup> | ---                                                                                                                                                                                       | medium       |
|                                | DM (type 1 or type 2)                                        | ---                                                                                                                                                                                       | high         |
|                                | Dyslipidemia                                                 | ---                                                                                                                                                                                       | high         |
|                                | Hypertension                                                 | ---                                                                                                                                                                                       | medium       |
|                                | Smoking, prior                                               | ---                                                                                                                                                                                       | high         |
|                                | Alcohol, current                                             | ---                                                                                                                                                                                       | high         |
| Dogra_2012 <sup>80</sup>       | BMI $\geq 25$ kg/m <sup>2</sup> versus <25 kg/m <sup>2</sup> | age, sex                                                                                                                                                                                  | low          |
|                                | DM (type 1 or type 2)                                        | age, sex                                                                                                                                                                                  | low          |
|                                | Family history of cardiac disease                            | age, sex                                                                                                                                                                                  | medium       |
|                                | Hypertension                                                 | age, sex                                                                                                                                                                                  | low          |
|                                | Smoking, current                                             | age, sex                                                                                                                                                                                  | medium       |
|                                | Alcohol, current                                             | age, sex                                                                                                                                                                                  | medium       |
| Elmfeldt_1976 <sup>81</sup>    | Hypertension                                                 | ---                                                                                                                                                                                       | high         |
|                                | Smoking, current                                             | ---                                                                                                                                                                                       | high         |
| Emanuele_2010 <sup>82</sup>    | Smoking, current                                             | ---                                                                                                                                                                                       | high         |
| Franco_2000 <sup>83</sup>      | BMI $\geq 30$ kg/m <sup>2</sup> versus <30 kg/m <sup>2</sup> | ---                                                                                                                                                                                       | medium       |
|                                | DM (type 1 or type 2)                                        | ---                                                                                                                                                                                       | high         |
|                                | Dyslipidemia, not specified                                  | ---                                                                                                                                                                                       | high         |
|                                | Family history of cardiac disease                            | ---                                                                                                                                                                                       | high         |
|                                | Hypertension                                                 | ---                                                                                                                                                                                       | high         |
|                                | Smoking, current                                             | ---                                                                                                                                                                                       | high         |
| Friedlander_2001 <sup>84</sup> | DM (type 1 or type 2)                                        | ---                                                                                                                                                                                       | high         |
|                                | Family history of cardiac disease                            | risk factors [not specified] and person-years at risk among first-degree relatives                                                                                                        | medium       |
|                                | Race (White versus other)                                    | ---                                                                                                                                                                                       | medium       |
| Gertler_1951 <sup>85</sup>     | Total cholesterol >200 mg/dL                                 | ---                                                                                                                                                                                       | medium       |
|                                | Family history of cardiac disease                            | ---                                                                                                                                                                                       | high         |

| Study                         | Risk factor in meta-analysis                                 | Covariates, if adjusted                                                                                                                                                                                                             | Risk of bias |
|-------------------------------|--------------------------------------------------------------|-------------------------------------------------------------------------------------------------------------------------------------------------------------------------------------------------------------------------------------|--------------|
| Guella_2011 <sup>86</sup>     | BMI $\geq 30$ kg/m <sup>2</sup> versus <30 kg/m <sup>2</sup> | ---                                                                                                                                                                                                                                 | medium       |
|                               | BMI $\geq 25$ kg/m <sup>2</sup> versus <25 kg/m <sup>2</sup> | ---                                                                                                                                                                                                                                 | medium       |
|                               | DM (type 1 or type 2)                                        | cardiovascular risk factors                                                                                                                                                                                                         | medium       |
|                               | Dyslipidemia, not specified                                  | cardiovascular risk factors                                                                                                                                                                                                         | low          |
|                               | Hypertension                                                 | cardiovascular risk factors                                                                                                                                                                                                         | low          |
| Gupta_2018 <sup>87</sup>      | Family history of cardiac disease                            | ---                                                                                                                                                                                                                                 | high         |
|                               | Hypertension                                                 | ---                                                                                                                                                                                                                                 | high         |
|                               | Smoking, current                                             | ---                                                                                                                                                                                                                                 | high         |
|                               | DM (type 1 or type 2)                                        | ---                                                                                                                                                                                                                                 | high         |
|                               | BMI $\geq 25$ kg/m <sup>2</sup> versus <25 kg/m <sup>2</sup> | ---                                                                                                                                                                                                                                 | high         |
| Hamsten_1986 <sup>88</sup>    | DM (type 1 or type 2)                                        | ---                                                                                                                                                                                                                                 | medium       |
|                               | Hypertension                                                 | ---                                                                                                                                                                                                                                 | medium       |
|                               | Smoking, prior                                               | ---                                                                                                                                                                                                                                 | high         |
|                               | Smoking, current                                             | ---                                                                                                                                                                                                                                 | high         |
| Hbejan_2011 <sup>89</sup>     | DM (type 1 or type 2)                                        | ---                                                                                                                                                                                                                                 | high         |
|                               | Dyslipidemia, not specified                                  | ---                                                                                                                                                                                                                                 | high         |
|                               | Family history of cardiac disease                            | ---                                                                                                                                                                                                                                 | high         |
|                               | Hypertension                                                 | ---                                                                                                                                                                                                                                 | high         |
|                               | Smoking, prior                                               | gender, age, family history of MI, BMI, total energy intake, alcohol and caffeine consumption, leisure-time physical activity, presence (yes or no) of angina, dyslipidemia, hypertension, and DM                                   | medium       |
|                               | Smoking, current                                             | ---                                                                                                                                                                                                                                 | high         |
| Iacoviello_2005 <sup>90</sup> | DM (type 1 or type 2)                                        | ---                                                                                                                                                                                                                                 | medium       |
|                               | Dyslipidemia, not specified                                  | ---                                                                                                                                                                                                                                 | medium       |
|                               | Family history of cardiac disease                            | ---                                                                                                                                                                                                                                 | high         |
|                               | Hypertension                                                 | ---                                                                                                                                                                                                                                 | medium       |
|                               | Smoking, prior                                               | ---                                                                                                                                                                                                                                 | high         |
|                               | Smoking, current                                             | ---                                                                                                                                                                                                                                 | high         |
| Inbal_1999 <sup>91</sup>      | DM (type 1 or type 2)                                        | ---                                                                                                                                                                                                                                 | high         |
|                               | Total cholesterol >200 mg/dL                                 | ---                                                                                                                                                                                                                                 | medium       |
|                               | Hypertension                                                 | ---                                                                                                                                                                                                                                 | medium       |
|                               | Smoking, prior                                               | ---                                                                                                                                                                                                                                 | high         |
|                               | Smoking, current                                             | ---                                                                                                                                                                                                                                 | high         |
| Jolly_2010 <sup>92</sup>      | Race (Black versus other)                                    | ---                                                                                                                                                                                                                                 | high         |
| Kaufman_1983 <sup>93</sup>    | Smoking, prior                                               | age, geographic region of interview, drug treatment for hypertension, history of elevated cholesterol, drug treatment for DM, family history of MI or stroke, personality score, alcohol consumption, religion, and marital status. | medium       |
|                               | Smoking, current                                             | ---                                                                                                                                                                                                                                 | high         |
| Kaufman_1985 <sup>94</sup>    | Alcohol, current                                             | ---                                                                                                                                                                                                                                 | high         |

| Study                            | Risk factor in meta-analysis                                    | Covariates, if adjusted                                                                                                                                                                                                                                                                                                | Risk of bias |
|----------------------------------|-----------------------------------------------------------------|------------------------------------------------------------------------------------------------------------------------------------------------------------------------------------------------------------------------------------------------------------------------------------------------------------------------|--------------|
|                                  | Alcohol, prior                                                  | age, geographic region of hospital, religion, marital status, years of education, cigarette smoking, history of drug treatment for hypertension, history of abnormal blood lipids, history of drug treatment for DM, BMI, family history of MI or stroke, personality score, and minutes of aerobic exercise per week. | medium       |
| Khare_2005 <sup>95</sup>         | Family history of cardiac disease                               | ---                                                                                                                                                                                                                                                                                                                    | high         |
| Kinjo_2002 <sup>96</sup>         | DM (type 1 or type 2)                                           | ---                                                                                                                                                                                                                                                                                                                    | medium       |
|                                  | Hypertension                                                    | ---                                                                                                                                                                                                                                                                                                                    | medium       |
|                                  | Smoking, current                                                | ---                                                                                                                                                                                                                                                                                                                    | high         |
| La Vecchia_1987 <sup>97</sup>    | BMI $\geq 25$ kg/m <sup>2</sup> versus $< 25$ kg/m <sup>2</sup> | geographic area, marital status, education, social class, cigarette smoking, alcohol and coffee consumption, parity, age at menopause, diabetes, hypertension, obesity, hyperlipidemia, family history of ischemic heart disease, and oral contraceptive and other female hormone use.                                 | low          |
| La Vecchia_1987 <sup>98</sup>    | DM (type 1 or type 2)                                           | ---                                                                                                                                                                                                                                                                                                                    | high         |
|                                  | Dyslipidemia, not specified                                     | ---                                                                                                                                                                                                                                                                                                                    | high         |
|                                  | Family history of cardiac disease                               | ---                                                                                                                                                                                                                                                                                                                    | high         |
|                                  | Hypertension                                                    | ---                                                                                                                                                                                                                                                                                                                    | high         |
|                                  | Smoking, prior                                                  | ---                                                                                                                                                                                                                                                                                                                    | high         |
|                                  | Smoking, current                                                | ---                                                                                                                                                                                                                                                                                                                    | high         |
| Le Cam-Duchez_2009 <sup>99</sup> | BMI $\geq 30$ kg/m <sup>2</sup> versus $< 30$ kg/m <sup>2</sup> | ---                                                                                                                                                                                                                                                                                                                    | medium       |
|                                  | Dyslipidemia, not specified                                     | Protein Z (vitamin K-dependent glycoprotein) polymorphisms                                                                                                                                                                                                                                                             | medium       |
|                                  | Family history of cardiac disease                               | Protein Z (vitamin K-dependent glycoprotein) polymorphisms                                                                                                                                                                                                                                                             | medium       |
|                                  | Smoking, current                                                | Protein Z (vitamin K-dependent glycoprotein) polymorphisms                                                                                                                                                                                                                                                             | medium       |
| Lee_2020 <sup>34</sup>           | Total cholesterol                                               | ---                                                                                                                                                                                                                                                                                                                    | medium       |
|                                  | HDL cholesterol                                                 | ---                                                                                                                                                                                                                                                                                                                    | medium       |
|                                  | LDL cholesterol                                                 | ---                                                                                                                                                                                                                                                                                                                    | medium       |
|                                  | Triglycerides                                                   | ---                                                                                                                                                                                                                                                                                                                    | medium       |
| Leitersdorf_1986 <sup>100</sup>  | DM (type 1 or type 2)                                           | ---                                                                                                                                                                                                                                                                                                                    | high         |
|                                  | Hypertension                                                    | ---                                                                                                                                                                                                                                                                                                                    | high         |
|                                  | Smoking, prior                                                  | ---                                                                                                                                                                                                                                                                                                                    | high         |
|                                  | Smoking, current                                                | ---                                                                                                                                                                                                                                                                                                                    | high         |
| Li_2017 <sup>101</sup>           | DM (type 1 or type 2)                                           | ---                                                                                                                                                                                                                                                                                                                    | medium       |
|                                  | Family history of cardiac disease                               | ---                                                                                                                                                                                                                                                                                                                    | high         |
|                                  | Hypertension                                                    | ---                                                                                                                                                                                                                                                                                                                    | medium       |
|                                  | Smoking, current                                                | ---                                                                                                                                                                                                                                                                                                                    | high         |
|                                  | Alcohol, current                                                | ---                                                                                                                                                                                                                                                                                                                    | high         |
| Lima-Neto_2013 <sup>102</sup>    | Alcohol, current                                                | ---                                                                                                                                                                                                                                                                                                                    | high         |
| Liu_2007 <sup>103</sup>          | Family history of cardiac disease                               | ---                                                                                                                                                                                                                                                                                                                    | high         |
|                                  | DM (type 1 or type 2)                                           | multiple logistic regression model with smoking, DM, hypertension, and CYP2J2*7 T allele                                                                                                                                                                                                                               | low          |
|                                  | Hypertension                                                    |                                                                                                                                                                                                                                                                                                                        | low          |

| Study                             | Risk factor in meta-analysis                                    | Covariates, if adjusted                                                                                                                                                                                                                            | Risk of bias |      |
|-----------------------------------|-----------------------------------------------------------------|----------------------------------------------------------------------------------------------------------------------------------------------------------------------------------------------------------------------------------------------------|--------------|------|
|                                   | Smoking, current                                                |                                                                                                                                                                                                                                                    | medium       |      |
| Maddhuri_2018 <sup>104</sup>      | Family history of cardiac disease                               | ---                                                                                                                                                                                                                                                | high         |      |
|                                   | Smoking, current                                                | ---                                                                                                                                                                                                                                                | high         |      |
|                                   | Alcohol, current                                                | ---                                                                                                                                                                                                                                                | high         |      |
| Maino_2016 <sup>105</sup>         | Alcohol, current                                                | ---                                                                                                                                                                                                                                                | high         |      |
| Malinauskiene_2010 <sup>106</sup> | BMI $\geq 30$ kg/m <sup>2</sup> versus $< 30$ kg/m <sup>2</sup> | ---                                                                                                                                                                                                                                                | medium       |      |
|                                   | Hypertension                                                    | ---                                                                                                                                                                                                                                                | medium       |      |
|                                   | Smoking, current                                                | ---                                                                                                                                                                                                                                                | high         |      |
| Medina_2008 <sup>107</sup>        | BMI $\geq 30$ kg/m <sup>2</sup> versus $< 30$ kg/m <sup>2</sup> | age, sex, smoking, dyslipidemia, hypertension, DM, BMI $\geq 30$ kg/m <sup>2</sup> , presence of endothelial protein C receptor (EPCR) alleles A3 (4600G allele) and A1 (4678C allele)                                                             | low          |      |
|                                   | DM (type 1 or type 2)                                           |                                                                                                                                                                                                                                                    | low          |      |
|                                   | Dyslipidemia, not specified                                     |                                                                                                                                                                                                                                                    | low          |      |
|                                   | Hypertension                                                    |                                                                                                                                                                                                                                                    | low          |      |
|                                   | Smoking, current                                                |                                                                                                                                                                                                                                                    | medium       |      |
| Montes_2005 <sup>32</sup>         | HDL/total cholesterol ratio                                     | BMI, hypertension, family history of coronary heart disease, smoking, DM, menopause, estrogen use, triglycerides, antibodies to endothelial protein C receptor (IgA and IgM)                                                                       | low          |      |
| Negri_1995 <sup>108</sup>         | BMI $\geq 25$ kg/m <sup>2</sup> versus $< 25$ kg/m <sup>2</sup> | sex, age, area of residence, education, smoking, cholesterol (mg/dL) tertiles ( $< 188$ ; 188-225; $\geq 226$ ), hypertension, DM, BMI, family history of acute MI                                                                                 | low          |      |
|                                   | Diabetes (type 1 or type 2)                                     |                                                                                                                                                                                                                                                    | medium       |      |
|                                   | Total cholesterol $> 200$ mg/dL                                 |                                                                                                                                                                                                                                                    | low          |      |
|                                   | Fam history of cardiac disease                                  |                                                                                                                                                                                                                                                    | medium       |      |
|                                   | Hypertension                                                    |                                                                                                                                                                                                                                                    | medium       |      |
|                                   | Smoking, current                                                |                                                                                                                                                                                                                                                    | medium       |      |
| Nora_1980 <sup>109</sup>          | Total cholesterol $> 200$ mg/dL                                 | ---                                                                                                                                                                                                                                                | medium       |      |
|                                   | Triglycerides $> 150$ mg/dL                                     | ---                                                                                                                                                                                                                                                | medium       |      |
|                                   | Family history of cardiac disease                               | ---                                                                                                                                                                                                                                                | high         |      |
|                                   | Hypertension                                                    | ---                                                                                                                                                                                                                                                | medium       |      |
|                                   | Smoking, current                                                | ---                                                                                                                                                                                                                                                | high         |      |
| Oliveira_2009 <sup>110</sup>      | BMI $\geq 30$ kg/m <sup>2</sup> versus $< 30$ kg/m <sup>2</sup> | age, education, smoking and family history of acute MI                                                                                                                                                                                             | low          |      |
|                                   | BMI $\geq 25$ kg/m <sup>2</sup> versus $< 25$ kg/m <sup>2</sup> |                                                                                                                                                                                                                                                    | low          |      |
| Oliveira_2009 <sup>30</sup>       | Obesity, waist-to-hip ratio                                     | age, education, family history of MI, waist-to-hip ratio, smoking, total energy intake and leisure-time physical activity. Also adjustments for hypertension, dyslipidemia and diabetes were made for all variables, except for waist-to-hip ratio | low          |      |
|                                   | DM (type 1 or type 2)                                           |                                                                                                                                                                                                                                                    | medium       |      |
|                                   | Dyslipidemia, not specified                                     |                                                                                                                                                                                                                                                    | medium       |      |
|                                   | Family history of cardiac disease                               |                                                                                                                                                                                                                                                    | medium       |      |
|                                   | Hypertension                                                    |                                                                                                                                                                                                                                                    | medium       |      |
|                                   | Alcohol, never                                                  |                                                                                                                                                                                                                                                    | medium       |      |
|                                   | Smoking, current                                                |                                                                                                                                                                                                                                                    | ---          | high |
|                                   | Alcohol, current                                                |                                                                                                                                                                                                                                                    | ---          | high |
| Palacin_2011 <sup>111</sup>       | DM (type 1 or type 2)                                           | ---                                                                                                                                                                                                                                                | medium       |      |
|                                   | Dyslipidemia, not specified                                     | ---                                                                                                                                                                                                                                                | medium       |      |
|                                   | Hypertension                                                    | ---                                                                                                                                                                                                                                                | medium       |      |
|                                   | Smoking, current                                                | ---                                                                                                                                                                                                                                                | high         |      |
| Panagiotakos_2008 <sup>112</sup>  | Family history of cardiac disease                               | ---                                                                                                                                                                                                                                                | high         |      |

| Study                             | Risk factor in meta-analysis                                 | Covariates, if adjusted                                                                                                                                                                                                                                                                                                                  | Risk of bias |
|-----------------------------------|--------------------------------------------------------------|------------------------------------------------------------------------------------------------------------------------------------------------------------------------------------------------------------------------------------------------------------------------------------------------------------------------------------------|--------------|
| Qian_2015 <sup>31</sup>           | BMI $\geq 30$ kg/m <sup>2</sup> versus <30 kg/m <sup>2</sup> | ---                                                                                                                                                                                                                                                                                                                                      | high         |
|                                   | DM (type 1 or type 2)                                        | ---                                                                                                                                                                                                                                                                                                                                      | medium       |
|                                   | Dyslipidemia, not specified                                  | ---                                                                                                                                                                                                                                                                                                                                      | medium       |
|                                   | Family history of cardiac disease                            | ---                                                                                                                                                                                                                                                                                                                                      | high         |
|                                   | Hypertension                                                 | ---                                                                                                                                                                                                                                                                                                                                      | medium       |
|                                   | Smoking, current                                             | ---                                                                                                                                                                                                                                                                                                                                      | high         |
| Rallidis_2017A <sup>113</sup>     | DM (type 1 or type 2)                                        | ---                                                                                                                                                                                                                                                                                                                                      | medium       |
|                                   | Hypertension                                                 | ---                                                                                                                                                                                                                                                                                                                                      | medium       |
|                                   | Smoking, current                                             | ---                                                                                                                                                                                                                                                                                                                                      | high         |
| Rallidis_2017B <sup>114</sup>     | BMI $\geq 30$ kg/m <sup>2</sup> versus <30 kg/m <sup>2</sup> | ---                                                                                                                                                                                                                                                                                                                                      | medium       |
|                                   | Dyslipidemia, not specified                                  | ---                                                                                                                                                                                                                                                                                                                                      | medium       |
| Reiner_2007 <sup>115</sup>        | Dyslipidemia, not specified                                  | ---                                                                                                                                                                                                                                                                                                                                      | high         |
|                                   | Hypertension                                                 | ---                                                                                                                                                                                                                                                                                                                                      | high         |
|                                   | Smoking, current                                             | ---                                                                                                                                                                                                                                                                                                                                      | high         |
| Rivera-Garcia_2013 <sup>116</sup> | DM (type 1 or type 2)                                        | platelet glycoprotein IIIA PIA1/A2 polymorphisms and traditional cardiovascular risk factors                                                                                                                                                                                                                                             | medium       |
|                                   | Dyslipidemia, not specified                                  |                                                                                                                                                                                                                                                                                                                                          | low          |
|                                   | Family history of cardiac disease                            |                                                                                                                                                                                                                                                                                                                                          | medium       |
|                                   | Hypertension                                                 |                                                                                                                                                                                                                                                                                                                                          | low          |
|                                   | Smoking, current                                             |                                                                                                                                                                                                                                                                                                                                          | medium       |
| Roldan_2005 <sup>117</sup>        | DM (type 1 or type 2)                                        | sex, smoking, hypertension, DM, hypercholesterolemia, C46T factor XII polymorphism                                                                                                                                                                                                                                                       | medium       |
|                                   | Hypertension                                                 |                                                                                                                                                                                                                                                                                                                                          | medium       |
|                                   | Sex (males versus females)                                   |                                                                                                                                                                                                                                                                                                                                          | low          |
|                                   | Smoking, current                                             |                                                                                                                                                                                                                                                                                                                                          | medium       |
| Rosenberg_1980C <sup>118</sup>    | DM (type 1 or type 2)                                        | ---                                                                                                                                                                                                                                                                                                                                      | high         |
|                                   | Hypertension                                                 | ---                                                                                                                                                                                                                                                                                                                                      | high         |
|                                   | Race (White versus other)                                    | ---                                                                                                                                                                                                                                                                                                                                      | medium       |
| Rosenberg_1981 <sup>119</sup>     | Alcohol, current                                             | age, location of hospital, religion, years of education, menopausal status, number of visits to a physician or clinic in preceding year, cigarette smoking, hypertension, DM, history of abnormal blood lipids, history of obesity, year of admission, and oral contraceptive use within preceding year.                                 | medium       |
|                                   | Alcohol, prior                                               |                                                                                                                                                                                                                                                                                                                                          | medium       |
| Rosenberg_1983 <sup>120</sup>     | BMI $\geq 30$ kg/m <sup>2</sup> versus <30 kg/m <sup>2</sup> | age, geographic region of admitting hospital, oral contraceptive use, and other factors evaluated in the study                                                                                                                                                                                                                           | low          |
|                                   | Total cholesterol >200 mg/dL                                 | ---                                                                                                                                                                                                                                                                                                                                      | medium       |
|                                   | HDL cholesterol <60 mg/dL                                    | ---                                                                                                                                                                                                                                                                                                                                      | medium       |
|                                   | Family history of cardiac disease                            | ---                                                                                                                                                                                                                                                                                                                                      | high         |
| Rosenberg_1985 <sup>121</sup>     | Smoking, prior                                               | age, geographic area, oral contraceptive use, total serum cholesterol, HDL cholesterol, history of drug treated hypertension, history of drug treated angina pectoris, history of drug-treated DM, menopausal status, BMI, blood group, family history of MI or stroke in a parent or sibling before age 60 years, and personality score | high         |

| Study                            | Risk factor in meta-analysis                                 | Covariates, if adjusted                                                                                   | Risk of bias |
|----------------------------------|--------------------------------------------------------------|-----------------------------------------------------------------------------------------------------------|--------------|
|                                  | Smoking, current                                             | ---                                                                                                       | high         |
| Russo_2012 <sup>122</sup>        | BMI $\geq 25$ kg/m <sup>2</sup> versus <25 kg/m <sup>2</sup> | ---                                                                                                       | medium       |
|                                  | DM (type 1 or type 2)                                        | ---                                                                                                       | medium       |
|                                  | Total cholesterol >200 mg/dL                                 | ---                                                                                                       | medium       |
|                                  | Family history of cardiac disease                            | ---                                                                                                       | high         |
|                                  | Hypertension                                                 | ---                                                                                                       | medium       |
|                                  | Smoking, current                                             | ---                                                                                                       | high         |
| Saigo_2001 <sup>123</sup>        | BMI $\geq 25$ kg/m <sup>2</sup> versus <25 kg/m <sup>2</sup> | multivariate logistic regression analysis of conventional coronary risk factors and hemostatic parameters | low          |
|                                  | DM (type 1 or type 2)                                        |                                                                                                           | low          |
|                                  | Dyslipidemia, not specified                                  |                                                                                                           | low          |
|                                  | Hypertension                                                 |                                                                                                           | low          |
|                                  | Smoking, current                                             |                                                                                                           | medium       |
| Sala_2001 <sup>124</sup>         | BMI $\geq 25$ kg/m <sup>2</sup> versus <25 kg/m <sup>2</sup> | E27 $\beta_2$ -adrenergic receptor polymorphisms, age, smoking, DM, dyslipidemia, hypertension, and BMI   | low          |
| Sampaio_2007 <sup>125</sup>      | BMI $\geq 30$ kg/m <sup>2</sup> versus <30 kg/m <sup>2</sup> | ---                                                                                                       | medium       |
|                                  | DM (type 1 or type 2)                                        | ---                                                                                                       | medium       |
|                                  | LDL cholesterol, high, not specified                         | ---                                                                                                       | high         |
|                                  | Family history of cardiac disease                            | ---                                                                                                       | high         |
|                                  | Hypertension                                                 | ---                                                                                                       | medium       |
|                                  | Race (White versus other)                                    | ---                                                                                                       | medium       |
|                                  | Smoking, current                                             | ---                                                                                                       | high         |
| Sandkamp_1990 <sup>126</sup>     | BMI $\geq 30$ kg/m <sup>2</sup> versus <30 kg/m <sup>2</sup> | ---                                                                                                       | medium       |
| Sastry_2006 <sup>127</sup>       | BMI $\geq 25$ kg/m <sup>2</sup> versus <25 kg/m <sup>2</sup> | ---                                                                                                       | high         |
|                                  | DM (type 1 or type 2)                                        | ---                                                                                                       | high         |
|                                  | Dyslipidemia, not specified                                  | ---                                                                                                       | high         |
|                                  | Hypertension                                                 | ---                                                                                                       | high         |
|                                  | Smoking                                                      | ---                                                                                                       | high         |
| Schargrodsky_1994 <sup>128</sup> | DM (type 1 or type 2)                                        | ---                                                                                                       | high         |
|                                  | Family history of cardiac disease                            | ---                                                                                                       | high         |
|                                  | Hypertension                                                 | ---                                                                                                       | high         |
|                                  | Smoking, prior                                               | ---                                                                                                       | high         |
|                                  | Smoking, current                                             | ---                                                                                                       | high         |
| Siegerink_2012 <sup>129</sup>    | DM (type 1 or type 2)                                        | ---                                                                                                       | high         |
|                                  | Dyslipidemia, not specified                                  | ---                                                                                                       | high         |
|                                  | Family history of cardiac disease                            | age (continuous), area of residence, year of event                                                        | medium       |
|                                  | Hypertension                                                 | ---                                                                                                       | high         |
|                                  | Race (White versus other)                                    | ---                                                                                                       | medium       |
|                                  | Smoking, current                                             | ---                                                                                                       | high         |
| Singh_2010 <sup>130</sup>        | BMI $\geq 25$ kg/m <sup>2</sup> versus <25 kg/m <sup>2</sup> | ---                                                                                                       | medium       |
|                                  | DM (type 1 or type 2)                                        | ---                                                                                                       | high         |
|                                  | Hypertension                                                 | ---                                                                                                       | high         |
|                                  | Smoking, current                                             | ---                                                                                                       | high         |

| Study                         | Risk factor in meta-analysis                                    | Covariates, if adjusted                                                                                                                                                                                                   | Risk of bias |
|-------------------------------|-----------------------------------------------------------------|---------------------------------------------------------------------------------------------------------------------------------------------------------------------------------------------------------------------------|--------------|
| Sniderman_2016 <sup>133</sup> | Total cholesterol, per SD change                                | age, sex, ethnicity, smoking, systolic blood pressure, diastolic blood pressure, and lipid-lowering medication                                                                                                            | low          |
|                               | HDL cholesterol, per SD change                                  |                                                                                                                                                                                                                           | low          |
|                               | LDL cholesterol, per SD change                                  |                                                                                                                                                                                                                           | low          |
|                               | Non-HDL cholesterol, per SD change                              |                                                                                                                                                                                                                           | low          |
|                               | Apo A1, per SD change                                           |                                                                                                                                                                                                                           | low          |
|                               | Apo B, per SD change                                            |                                                                                                                                                                                                                           | low          |
| Tanis_2006 <sup>131</sup>     | BMI $\geq 25$ kg/m <sup>2</sup> versus $< 25$ kg/m <sup>2</sup> | ---                                                                                                                                                                                                                       | medium       |
|                               | C-reactive protein                                              | age, index year, area of residence, DM, BMI, hypercholesterolemia                                                                                                                                                         | low          |
| Vaccarino_2018 <sup>132</sup> | Race (Black versus other)                                       | ---                                                                                                                                                                                                                       | medium       |
| Walker_1967 <sup>133</sup>    | Family history of cardiac disease                               | ---                                                                                                                                                                                                                       | high         |
|                               | Hypertension                                                    | ---                                                                                                                                                                                                                       | high         |
|                               | Race (Black versus other)                                       | ---                                                                                                                                                                                                                       | medium       |
|                               | Smoking, current                                                | ---                                                                                                                                                                                                                       | high         |
|                               | Alcohol, current                                                | ---                                                                                                                                                                                                                       | high         |
| Westover_2008 <sup>134</sup>  | BMI $\geq 30$ kg/m <sup>2</sup> versus $< 30$ kg/m <sup>2</sup> | amphetamine abuse, cocaine abuse, tobacco, alcohol abuse, lipid disorder, hypertension, DM, obesity, congenital defects, coagulation defects                                                                              | medium       |
|                               | DM (type 1 or type 2)                                           |                                                                                                                                                                                                                           | medium       |
|                               | Dyslipidemia, not specified                                     |                                                                                                                                                                                                                           | medium       |
|                               | Hypertension, current                                           |                                                                                                                                                                                                                           | medium       |
|                               | Smoking, current                                                |                                                                                                                                                                                                                           | medium       |
|                               | Alcohol, current                                                |                                                                                                                                                                                                                           | medium       |
| Yamac_2018 <sup>135</sup>     | Family history of cardiac disease                               | ---                                                                                                                                                                                                                       | high         |
| Yusuf_2004 <sup>20</sup>      | Obesity, waist-to-hip ratio                                     | age, sex                                                                                                                                                                                                                  | low          |
|                               | DM (type 1 or type 2)                                           |                                                                                                                                                                                                                           | medium       |
|                               | ApoB/ApoA1, top versus lowest quintile                          |                                                                                                                                                                                                                           | low          |
|                               | Hypertension                                                    |                                                                                                                                                                                                                           | medium       |
|                               | Smoking, current                                                |                                                                                                                                                                                                                           | medium       |
|                               | Alcohol, current                                                |                                                                                                                                                                                                                           | medium       |
| Zoller_2015 <sup>136</sup>    | DM (type 1 or type 2)                                           | age, sex, fetal growth, gestational age at birth, multiple birth, maternal and paternal education, cardiovascular and chromosomal anomalies or syndromes, DM, hypertension and parental history of ischemic heart disease | medium       |
|                               | Family history of cardiac disease                               |                                                                                                                                                                                                                           | medium       |
|                               | Hypertension                                                    |                                                                                                                                                                                                                           | medium       |
|                               | Sex (males versus females)                                      |                                                                                                                                                                                                                           | low          |

Abbreviations: apo: apolipoprotein; BMI: body-mass index; DM: diabetes mellitus; HDL: high-density lipoprotein; LDL: low-density lipoprotein; MI: myocardial infarction; SD: standard deviation

**Supplemental Table 7: Sex (men versus women) and risk of premature MI**

|                               | Reference                  | Risk of Bias | Men versus women odds ratio (95% CI) |
|-------------------------------|----------------------------|--------------|--------------------------------------|
|                               | Celik_2008 <sup>73</sup>   | Low          | 1.76 (0.96-2.28)                     |
|                               | Roldan_2005 <sup>117</sup> | Low          | 3.50 (2.19-5.62)                     |
|                               | Zoller_2015 <sup>136</sup> | Low          | 2.33 (1.76-3.08)                     |
| Overall risk estimate         |                            |              | 2.39 (1.71-3.35)                     |
| I <sup>2</sup> value; p-value |                            |              | 55.2%; p=.11                         |

CI: confidence interval



# Supplemental Figure 1: Race (Black versus other) and risk of premature MI

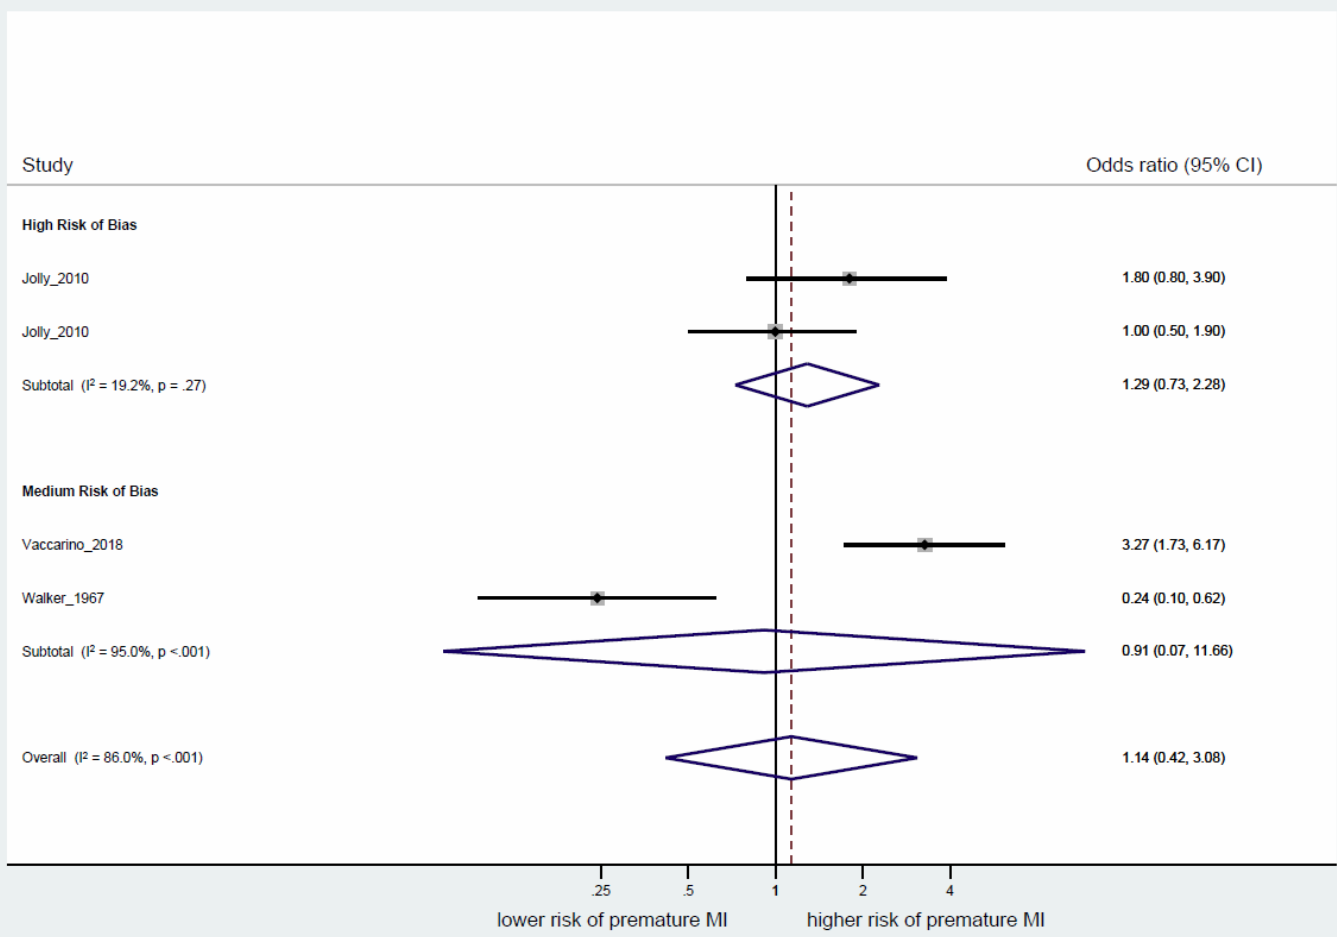

Abbreviations: CI: confidence interval; MI: myocardial infarction

## Supplemental Figure 2: Race (White versus other) and risk of premature MI

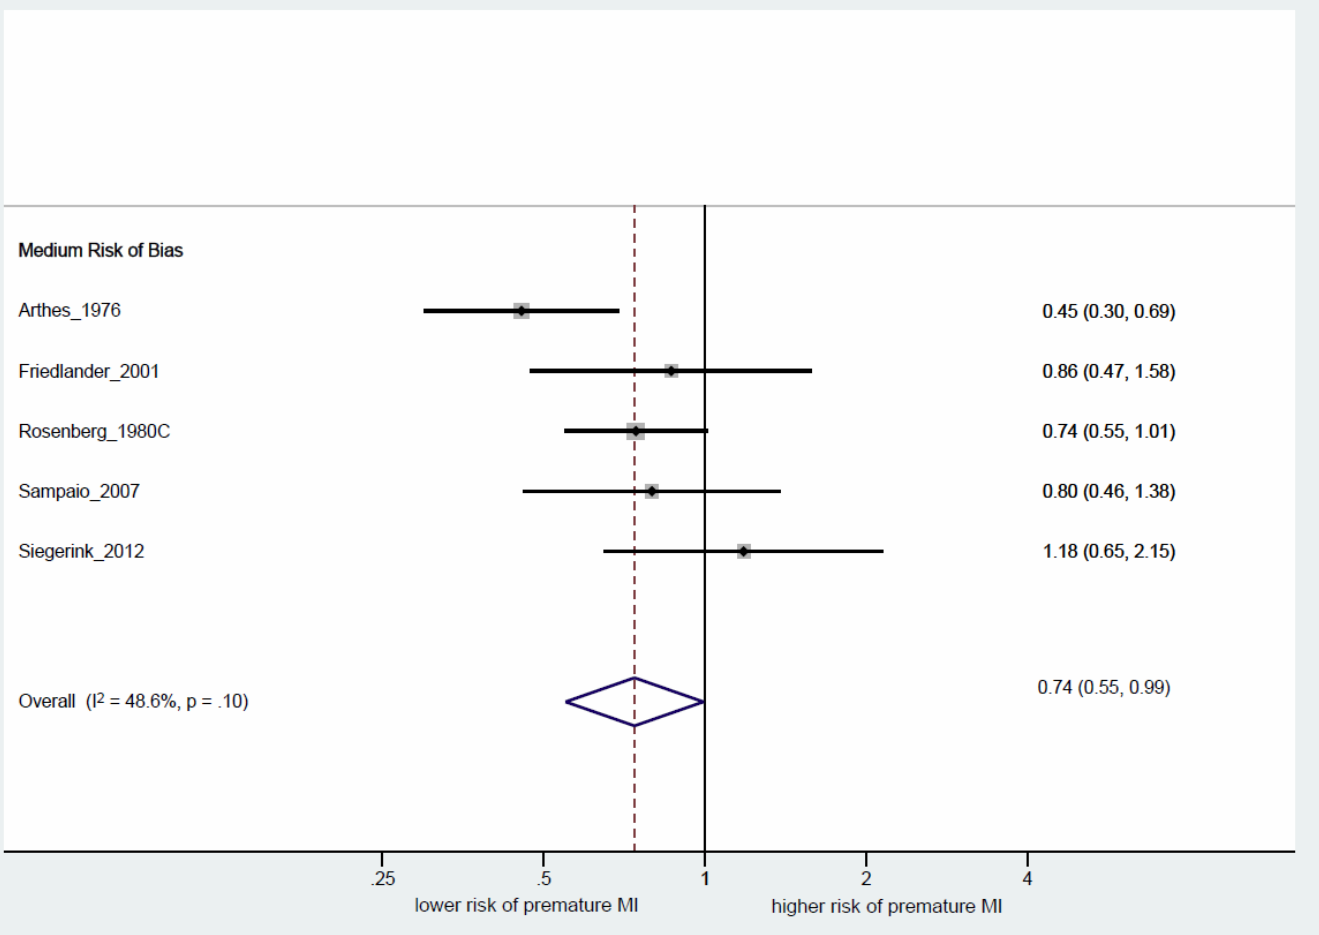

Abbreviations: CI: confidence interval; MI: myocardial infarction

**Supplemental Table 8: Demographics and risk of premature MI, categorized by sex**

| Risk factor                       | Reference                   | Men<br>OR (95% CI) | Reference                        | Women<br>OR (95% CI) |
|-----------------------------------|-----------------------------|--------------------|----------------------------------|----------------------|
| Race (White versus other)         |                             |                    | Arthes_1976 <sup>68</sup>        | 0.45 (0.30–0.69)     |
|                                   |                             |                    | Friedlander_2001 <sup>84</sup>   | 0.86 (0.47–1.58)     |
|                                   |                             |                    | Rosenberg_1980 <sup>118</sup>    | 0.74 (0.55–1.01)     |
|                                   |                             |                    | Siegerink_2012 <sup>129</sup>    | 1.18 (0.65–2.15)     |
| Subtotal risk estimate            |                             |                    |                                  | 0.73 (0.51–1.06)     |
| I <sup>2</sup> value; p-value     |                             |                    |                                  | 60.7%; p=0.05        |
| Race (Black versus other)         | Walker_1967 <sup>133</sup>  | 0.24 (0.10–0.62)   | Vaccarino_2018 <sup>132</sup>    | 3.27 (1.73–6.17)     |
| Family history of cardiac disease | Benze_2002 <sup>71</sup>    | 2.71 (1.72–4.27)   | Friedlander_2001 <sup>84</sup>   | 1.52 (1.00–2.32)     |
|                                   | Hbejan_2011 <sup>89</sup>   | 2.65 (1.76–3.98)   | La Vecchia_1987 <sup>98</sup>    | 2.08 (1.46–2.95)     |
|                                   | Li_2017 <sup>101</sup>      | 3.78 (2.36–6.04)   | Rosenberg_1983 <sup>120</sup>    | 1.94 (1.46–2.59)     |
|                                   | Oliveira_2009 <sup>30</sup> | 1.84 (1.07–3.17)   | Schargrotsky_1994 <sup>128</sup> | 1.25 (0.69–2.27)     |
|                                   | Walker_1967 <sup>133</sup>  | 3.67 (1.82–7.42)   | Siegerink_2012 <sup>129</sup>    | 3.70 (2.68–5.10)     |
| Subtotal risk estimate            |                             | 2.80 (2.21–3.54)   |                                  | 2.02 (1.43–2.87)     |
| I <sup>2</sup> value; p-value     |                             | 11.8%; p=0.34      |                                  | 76.8%; p=0.002       |

CI: confidence interval; MI: myocardial infarction; OR: odds ratio

### Supplemental Figure 3: Family history of cardiac disease and risk of premature MI

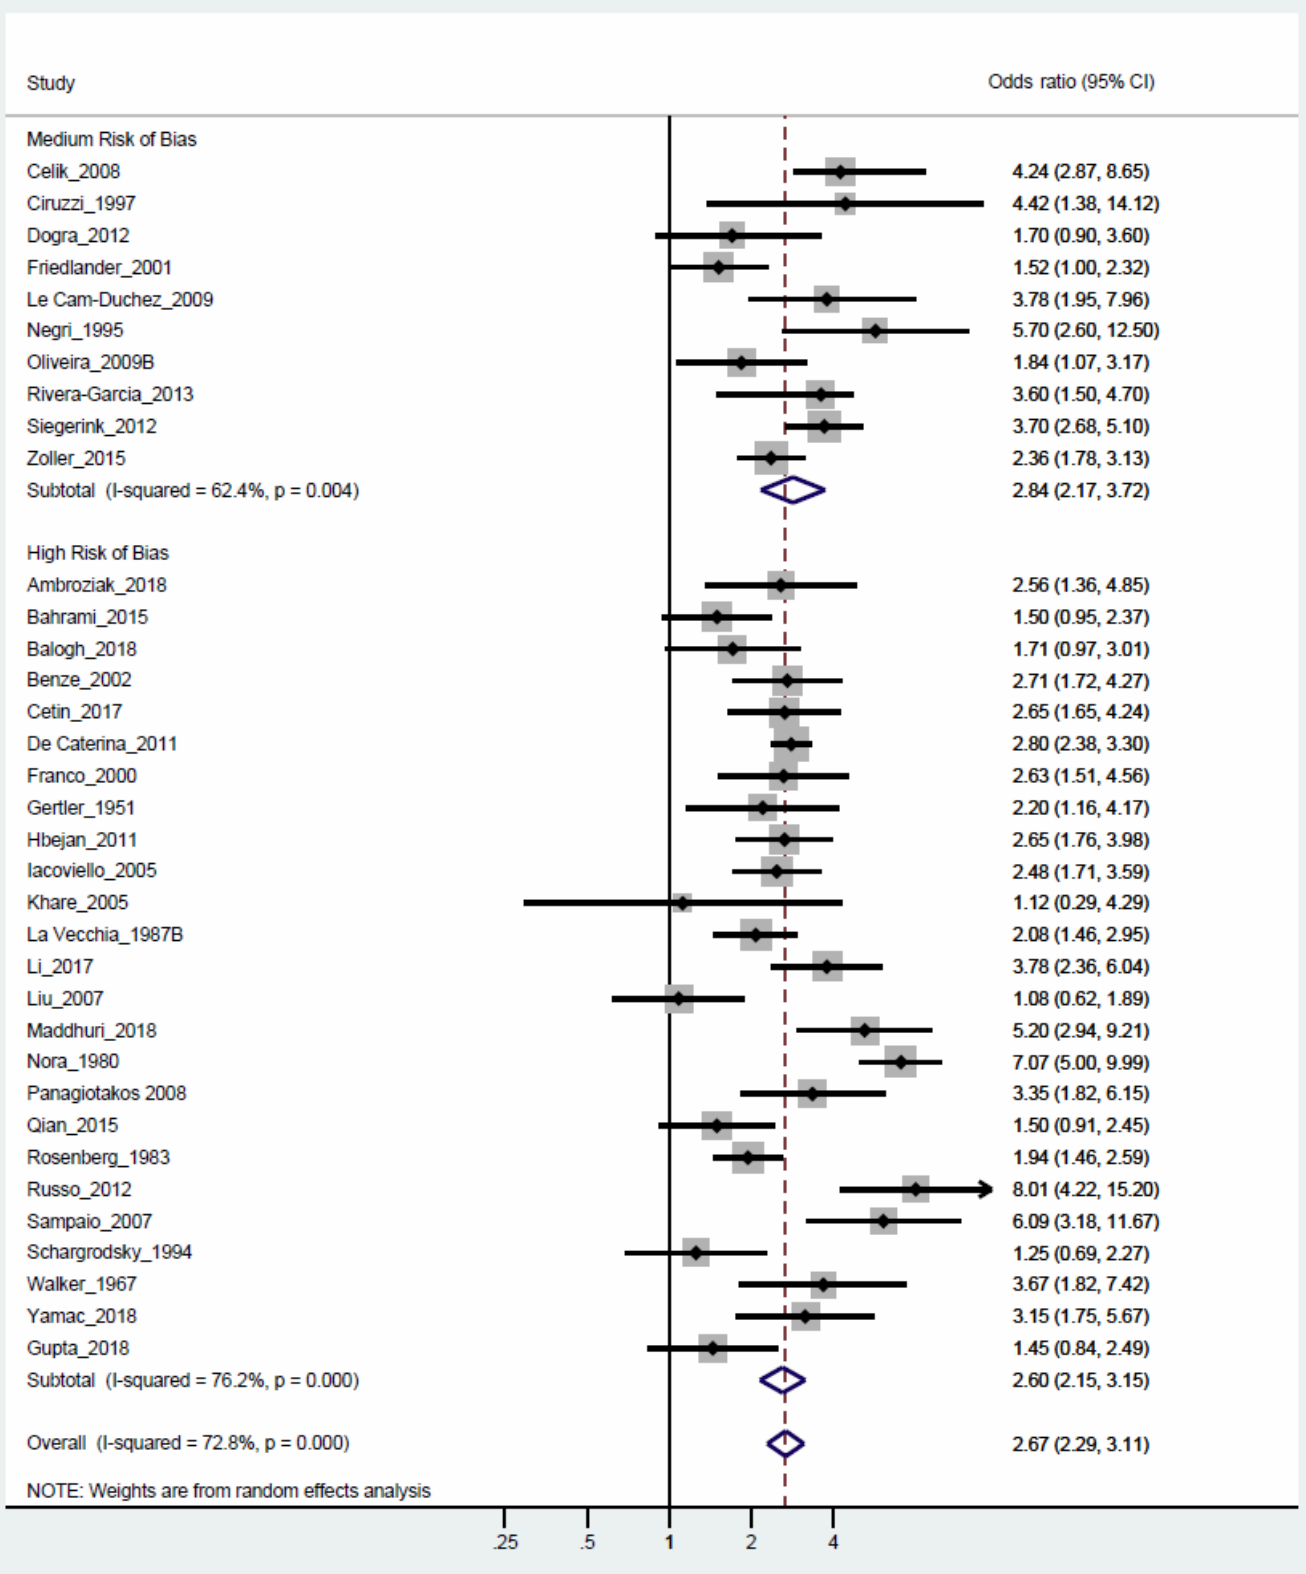

Abbreviations: CI: confidence interval; MI: myocardial infarction

### Supplemental Figure 4: Current smoking and risk of premature MI

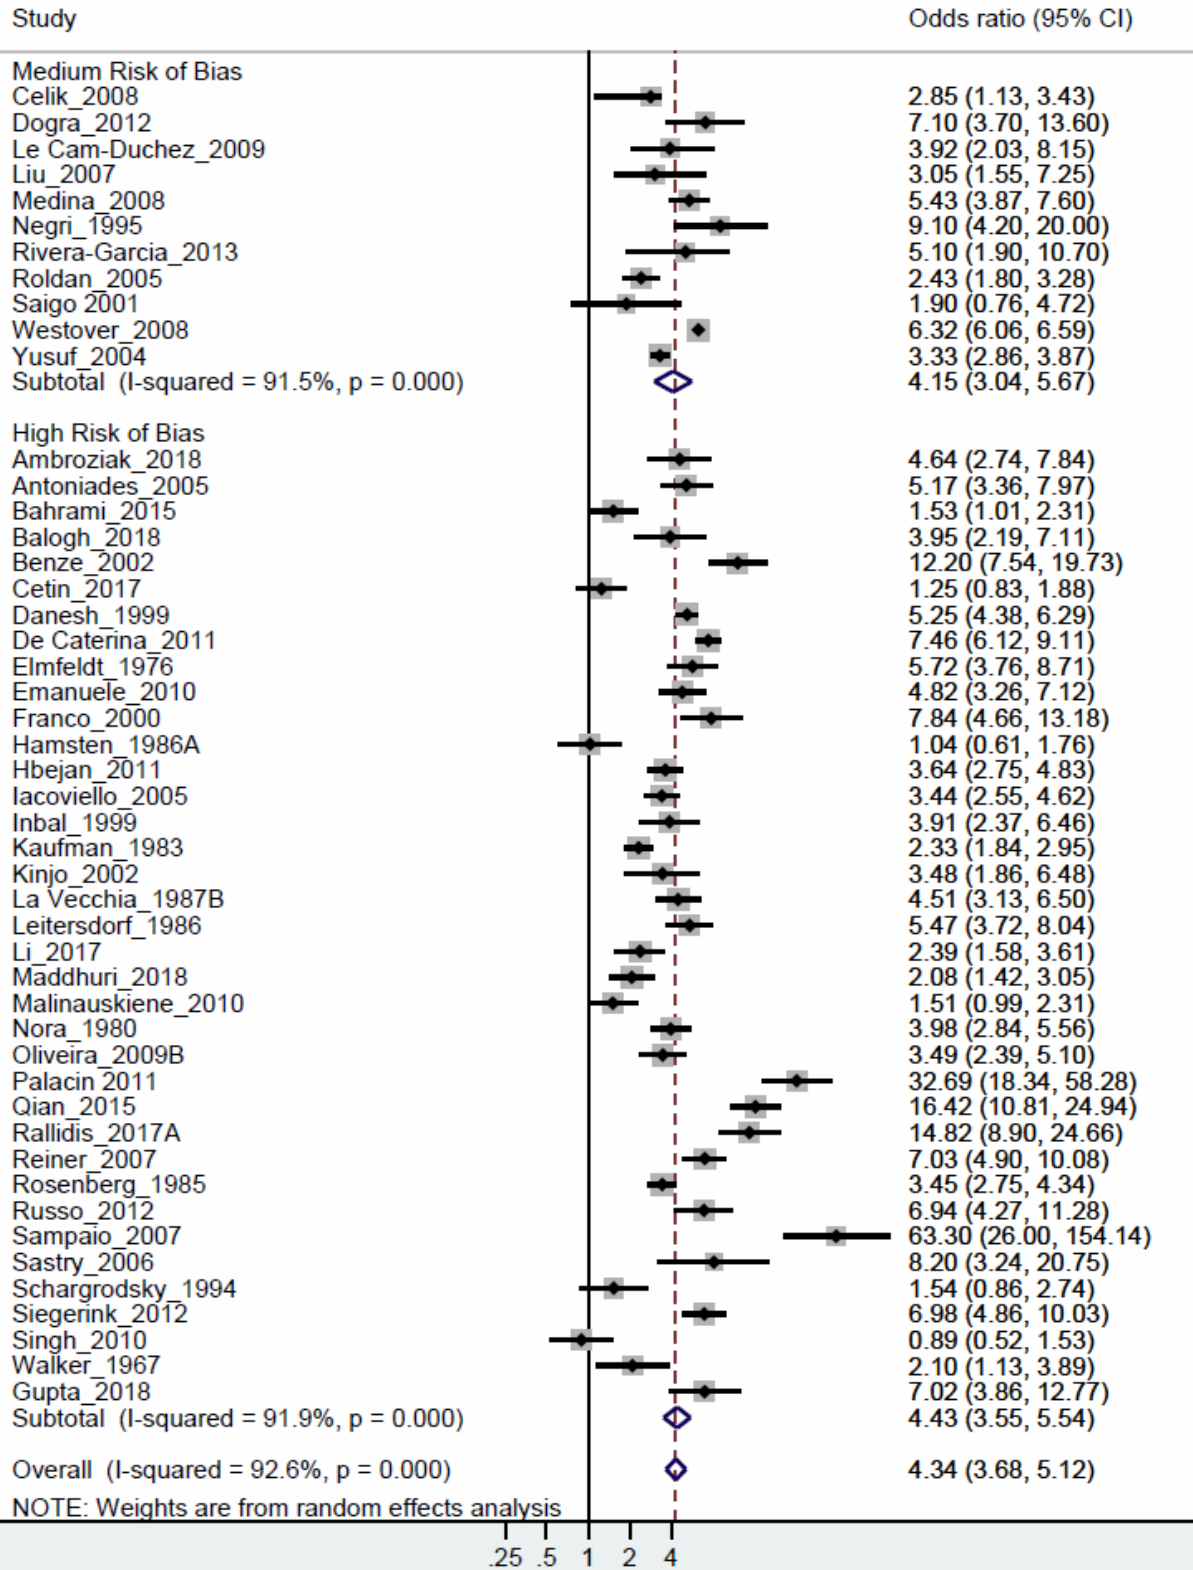

Abbreviations: CI: confidence interval; MI: myocardial infarction

### Supplemental Figure 5: Prior smoking and risk of premature MI

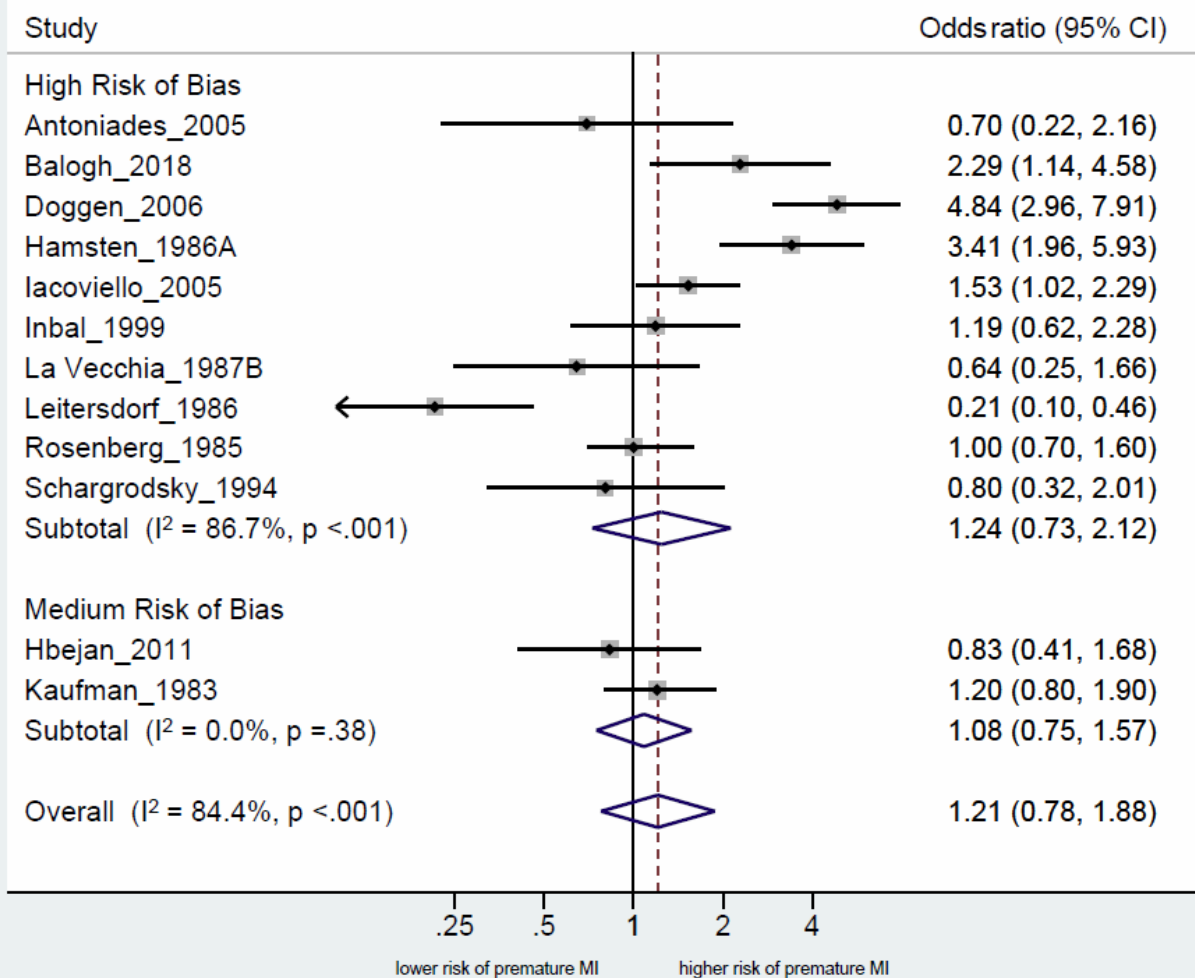

Abbreviations: CI: confidence interval; MI: myocardial infarction

## Supplemental Figure 6: Current alcohol use and risk of premature MI

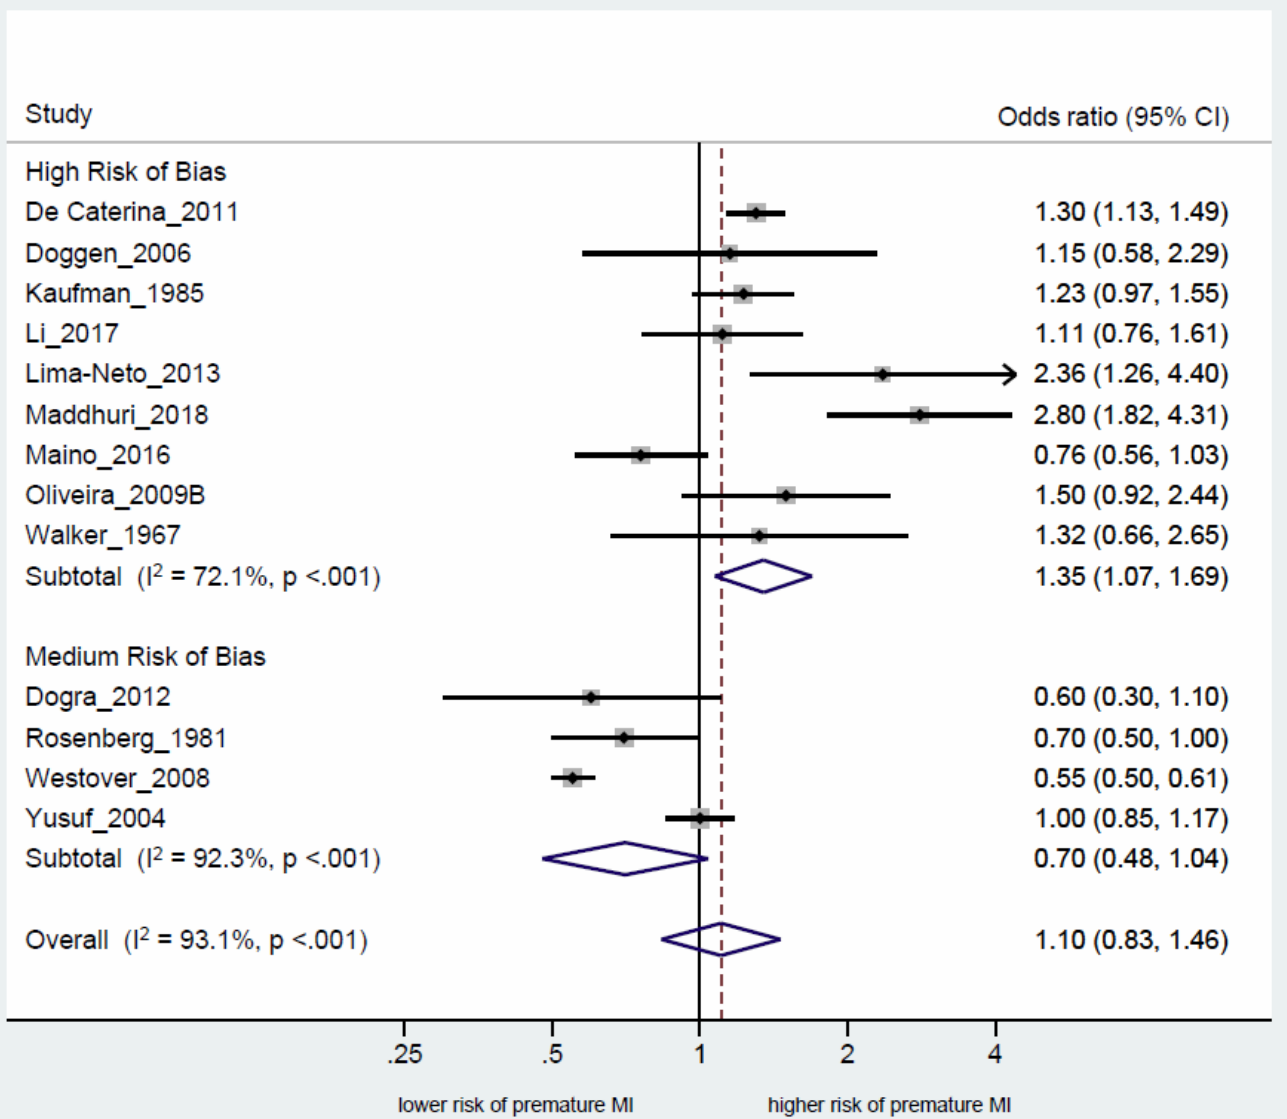

Abbreviations: CI: confidence interval; MI: myocardial infarction

**Supplemental Table 9: Prior alcohol use versus no/current and risk of premature MI**

|                               | <b>Reference</b>              | <b>Risk of Bias</b> | <b>Odds ratio (95% CI)</b> |
|-------------------------------|-------------------------------|---------------------|----------------------------|
|                               | Kaufman_1985 <sup>94</sup>    | Medium              | 0.70 (0.40–1.30)           |
|                               | Rosenberg_1981 <sup>119</sup> | Medium              | 0.80 (0.40–1.60)           |
| Overall risk estimate         |                               |                     | 0.74 (0.47–1.16)           |
| I <sup>2</sup> value; p-value |                               |                     | 0%; p=.77                  |

CI: confidence interval; MI: myocardial infarction



**Supplemental Table 10: Lifestyle factors and risk of premature MI, categorized by sex**

| Risk factor                   | Reference                       | Men                 | Reference                         | Women             |
|-------------------------------|---------------------------------|---------------------|-----------------------------------|-------------------|
| Smoking, current versus other | Benze_2002 <sup>71</sup>        | 12.20 (7.54–19.73)  | La Vecchia_1987 <sup>98</sup>     | 4.51 (3.13–6.50)  |
|                               | Elmfeldt_1976 <sup>81</sup>     | 5.72 (3.76–8.71)    | Malinauskiene_2010 <sup>106</sup> | 1.51 (0.99–2.31)  |
|                               | Hamsten_1986 <sup>88</sup>      | 1.04 (0.61–1.76)    | Reiner_2007 <sup>115</sup>        | 7.03 (4.90–10.08) |
|                               | Inbal_1999 <sup>91</sup>        | 3.91 (2.37–6.46)    | Rosenberg_1985 <sup>121</sup>     | 3.45 (2.75–4.34)  |
|                               | Kaufman_1983 <sup>93</sup>      | 2.33 (1.84–2.95)    | Schargrodsky_1994 <sup>128</sup>  | 1.54 (0.86–2.74)  |
|                               | Leitersdorf_1986 <sup>100</sup> | 5.47 (3.72–8.04)    | Siegerink_2012 <sup>129</sup>     | 6.98 (4.86–10.03) |
|                               | Li_2017 <sup>101</sup>          | 2.39 (1.58–3.61)    |                                   |                   |
|                               | Oliveira_2009 <sup>30</sup>     | 3.49 (2.39–5.10)    |                                   |                   |
|                               | Palacin_2011 <sup>111</sup>     | 32.69 (18.34–58.28) |                                   |                   |
|                               | Saigo_2001 <sup>123</sup>       | 1.90 (0.76–4.72)    |                                   |                   |
| Walker_1967 <sup>133</sup>    | 2.10 (1.13–3.89)                |                     |                                   |                   |
| Subtotal risk estimate        |                                 | 4.01 (2.47–6.50)    |                                   | 3.56 (2.22–5.71)  |
| I <sup>2</sup> value; p-value |                                 | 92.5%; p<0.001      |                                   | 90.2%; p<0.001    |
| Smoking, prior versus other   | Doggen_2006 <sup>79</sup>       | 4.84 (2.96–7.91)    | La Vecchia_1987 <sup>98</sup>     | 0.64 (0.25–1.66)  |
|                               | Hamsten_1986 <sup>88</sup>      | 3.41 (1.96–5.93)    | Rosenberg_1985 <sup>121</sup>     | 1.00 (0.70–1.60)  |
|                               | Inbal_1999 <sup>91</sup>        | 1.19 (0.62–2.28)    | Schargrodsky_1994 <sup>128</sup>  | 0.80 (0.32–2.01)  |
|                               | Kaufman_1983 <sup>93</sup>      | 1.20 (0.80–1.90)    |                                   |                   |
|                               | Leitersdorf_1986 <sup>100</sup> | 0.21 (0.10–0.46)    |                                   |                   |
| Subtotal risk estimate        |                                 | 1.42 (0.56–3.59)    |                                   | 0.91 (0.64–1.29)  |
| I <sup>2</sup> value; p-value |                                 | 92.8%; p<0.001      |                                   | 0.0%; p=0.68      |
| Alcohol, current versus other | Doggen_2006 <sup>79</sup>       | 1.15 (0.58–2.29)    | Maino_2016 <sup>105</sup>         | 0.76 (0.56–1.03)  |
|                               | Kaufman_1985 <sup>94</sup>      | 1.23 (0.97–1.55)    | Rosenberg_1981 <sup>119</sup>     | 0.70 (0.50–1.00)  |
|                               | Li_2017 <sup>101</sup>          | 1.11 (0.76–1.61)    |                                   |                   |
|                               | Oliveira_2009 <sup>30</sup>     | 1.50 (0.92–2.44)    |                                   |                   |
|                               | Walker_1967 <sup>133</sup>      | 1.32 (0.66–2.65)    |                                   |                   |
| Subtotal risk estimate        |                                 | 1.23 (1.04–1.47)    |                                   | 0.73 (0.58–0.92)  |
| I <sup>2</sup> value; p-value |                                 | 0.0%; p=0.91        |                                   | 0.0%, p=0.74      |
| Alcohol, prior versus other   | Kaufman_1985 <sup>94</sup>      | 0.70 (0.39–1.26)    | Rosenberg_1981 <sup>119</sup>     | 0.80 (0.40–1.60)  |
| Alcohol, never versus other   | Oliveira_2009 <sup>30</sup>     | 2.21 (1.10–4.45)    |                                   |                   |

### Supplemental Figure 7: Diabetes (type 1 or type 2) and risk of premature MI

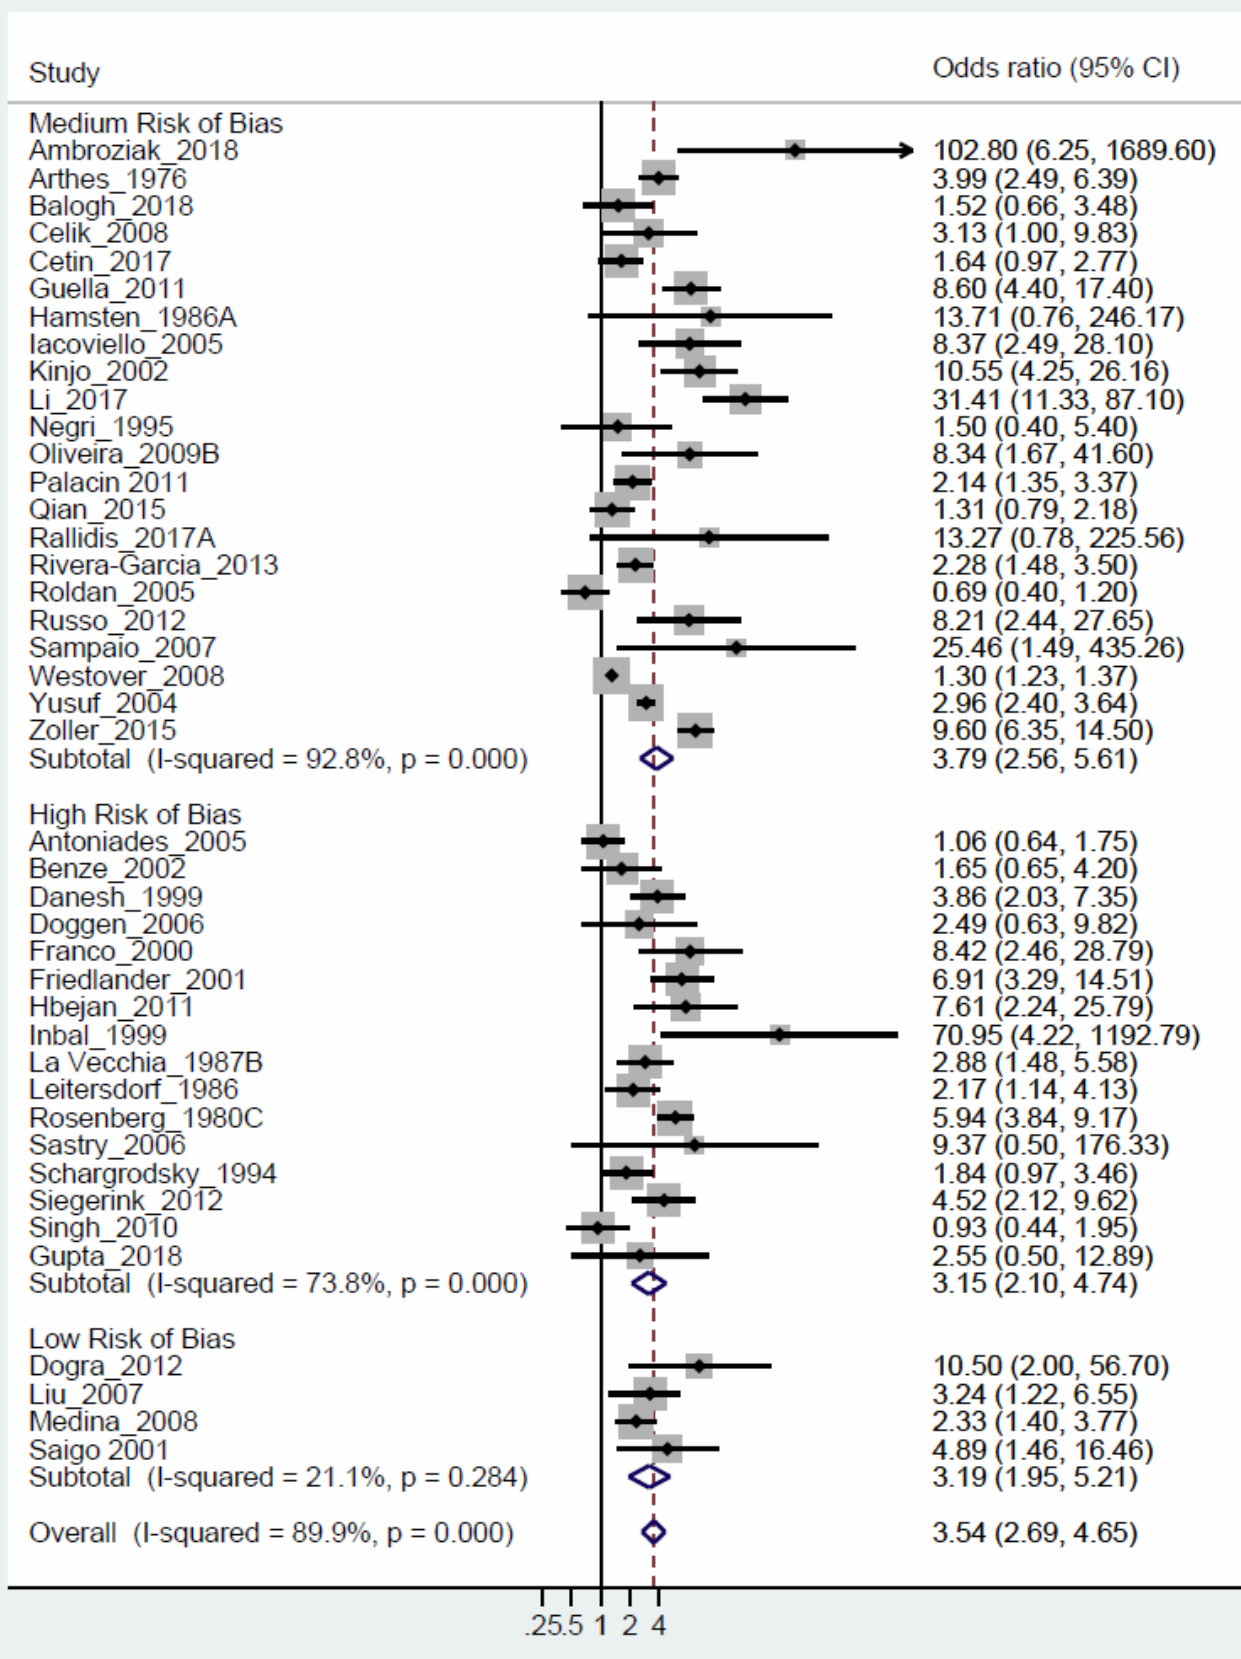

Abbreviations: CI: confidence interval; MI: myocardial infarction

**Supplemental Table 11: Clinical risk factors and risk of premature MI, categorized by sex**

| Risk factor                                              | Reference                       | Men                  | Reference                         | Women             |
|----------------------------------------------------------|---------------------------------|----------------------|-----------------------------------|-------------------|
| DM (type 1 or type 2)<br>(presence versus absence)       | Benze_2002 <sup>71</sup>        | 1.65 (0.65–4.20)     | Arthes_1976 <sup>68</sup>         | 3.99 (2.49–6.39)  |
|                                                          | Doggen_2006 <sup>79</sup>       | 2.49 (0.63–9.82)     | Friedlander_2001 <sup>84</sup>    | 6.91 (3.29–14.51) |
|                                                          | Hamsten_1986 <sup>88</sup>      | 13.71 (0.76–246.17)  | La Vecchia_1987 <sup>98</sup>     | 2.88 (1.48–5.58)  |
|                                                          | Hbejan_2011 <sup>89</sup>       | 7.61 (2.24–25.79)    | Rosenberg_1980 <sup>118</sup>     | 5.94 (3.84–9.17)  |
|                                                          | Inbal_1999 <sup>91</sup>        | 70.95 (4.22–1192.79) | Schargrodsky_1994 <sup>128</sup>  | 1.84 (0.97–3.46)  |
|                                                          | Leitersdorf_1986 <sup>100</sup> | 2.17 (1.14–4.13)     | Siegerink_2012 <sup>129</sup>     | 4.52 (2.12–9.62)  |
|                                                          | Li_2017 <sup>101</sup>          | 31.41 (11.33–87.10)  |                                   |                   |
|                                                          | Oliveira_2009 <sup>30</sup>     | 8.34 (1.67–41.60)    |                                   |                   |
|                                                          | Palacin_2011 <sup>111</sup>     | 2.14 (1.35–3.37)     |                                   |                   |
| Saigo_2001 <sup>123</sup>                                | 4.89 (1.46–16.46)               |                      |                                   |                   |
| Subtotal risk estimate                                   |                                 | 5.04 (2.56–9.91)     |                                   | 3.99 (2.74–5.83)  |
| I <sup>2</sup> value; p-value                            |                                 | 74.3%; p<0.001       |                                   | 69.2%; p=0.03     |
| Hypertension<br>(presence versus absence)                | Doggen_2006 <sup>79</sup>       | 1.68 (0.63–4.46)     | La Vecchia_1987 <sup>98</sup>     | 6.62 (4.23–10.35) |
|                                                          | Elmfeldt_1976 <sup>81</sup>     | 1.66 (1.15–2.41)     | Malinauskiene_2010 <sup>106</sup> | 3.95 (2.57–6.07)  |
|                                                          | Hamsten_1986 <sup>88</sup>      | 2.89 (1.39–6.00)     | Reiner_2007 <sup>115</sup>        | 2.97 (2.11–4.18)  |
|                                                          | Hbejan_2011 <sup>89</sup>       | 2.77 (1.76–4.36)     | Rosenberg_1980 <sup>118</sup>     | 2.64 (2.08–3.34)  |
|                                                          | Inbal_1999 <sup>91</sup>        | 2.03 (0.99–4.17)     | Schargrodsky_1994 <sup>128</sup>  | 5.05 (2.95–8.66)  |
|                                                          | Leitersdorf_1986 <sup>100</sup> | 2.96 (1.79–4.89)     | Siegerink_2012 <sup>129</sup>     | 4.94 (3.31–7.36)  |
|                                                          | Li_2017 <sup>101</sup>          | 3.94 (2.63–5.91)     |                                   |                   |
|                                                          | Oliveira_2009 <sup>30</sup>     | 1.46 (0.82–2.62)     |                                   |                   |
|                                                          | Palacin_2011 <sup>111</sup>     | 4.55 (3.26–6.36)     |                                   |                   |
|                                                          | Saigo_2001 <sup>123</sup>       | 0.93 (0.32–2.69)     |                                   |                   |
| Walker_1967 <sup>133</sup>                               | 2.47 (0.99–6.17)                |                      |                                   |                   |
| Subtotal risk estimate                                   |                                 | 2.45 (1.84–3.27)     |                                   | 4.01 (2.96–5.43)  |
| I <sup>2</sup> value; p-value                            |                                 | 65.7%; p=0.001       |                                   | 73.8%; p=0.002    |
| Dyslipidemia, not specified<br>(presence versus absence) | Doggen_2006 <sup>79</sup>       | 3.16 (0.33–30.70)    | La Vecchia_1987 <sup>98</sup>     | 3.30 (1.95–5.60)  |
|                                                          | Hbejan_2011 <sup>89</sup>       | 2.76 (1.92–3.95)     | Reiner_2007 <sup>115</sup>        | 2.16 (1.55–3.01)  |
|                                                          | Oliveira_2009 <sup>30</sup>     | 1.48 (0.92–2.37)     | Siegerink_2012 <sup>129</sup>     | 4.78 (2.72–8.40)  |
|                                                          | Palacin_2011 <sup>111</sup>     | 1.61 (1.13–2.29)     |                                   |                   |
|                                                          | Saigo_2001 <sup>123</sup>       | 3.02 (1.31–6.98)     |                                   |                   |
|                                                          | Subtotal risk estimate          |                      | 2.03 (1.47–2.80)                  |                   |
| I <sup>2</sup> value; p-value                            |                                 | 44.1%; p=0.13        |                                   | 67.5%; p=0.046    |
| BMI ≥30kg/m <sup>2</sup> versus<br><30kg/m <sup>2</sup>  | Doggen_2006 <sup>79</sup>       | 1.88 (1.03–3.40)     | Malinauskiene_2010 <sup>106</sup> | 1.27 (0.84–1.93)  |
|                                                          | Oliveira_2009 <sup>110</sup>    | 2.05 (1.08–3.87)     | Rosenberg_1983 <sup>120</sup>     | 1.00 (0.50–1.70)  |
|                                                          | Sandkamp_1990 <sup>126</sup>    | 1.38 (0.92–2.07)     | Choi_2018 <sup>75</sup>           | 1.64 (0.91–2.96)  |
|                                                          | Choi_2018 <sup>75</sup>         | 2.31 (2.08–2.57)     |                                   |                   |
| Subtotal risk estimate                                   |                                 | 1.94 (1.47–2.56)     |                                   | 1.28 (0.95–1.73)  |
| I <sup>2</sup> value; p-value                            |                                 | 51.4%; p=0.10        |                                   | 0.0%; p=0.52      |
| BMI ≥25kg/m <sup>2</sup> versus<br><25kg/m <sup>2</sup>  | Doggen_2006 <sup>79</sup>       | 1.14 (0.73–1.77)     | La Vecchia_1987 <sup>97</sup>     | 0.85 (0.47–1.55)  |
|                                                          | Oliveira_2009 <sup>110</sup>    | 1.65 (1.02–2.65)     | Tanis_2006 <sup>131</sup>         | 3.09 (2.09–4.57)  |
|                                                          | Saigo_2001 <sup>123</sup>       | 1.27 (0.50–3.25)     | Choi_2018 <sup>75</sup>           | 1.64 (0.91–2.96)  |
|                                                          | Sala_2001 <sup>124</sup>        | 1.26 (0.63–2.51)     |                                   |                   |
|                                                          | Choi_2018 <sup>75</sup>         | 2.31 (2.08–2.57)     |                                   |                   |
| Subtotal risk estimate                                   |                                 | 1.94 (1.47–2.56)     |                                   | 1.28 (0.95–1.73)  |
| I <sup>2</sup> value; p-value                            |                                 | 51.4%; p=0.10        |                                   | 0%; p=0.52        |

Abbreviations: BMI: body-mass index; DM: diabetes mellitus; CI: confidence interval; MI: myocardial infarction

## Supplemental Figure 8: Hypertension and risk of premature MI

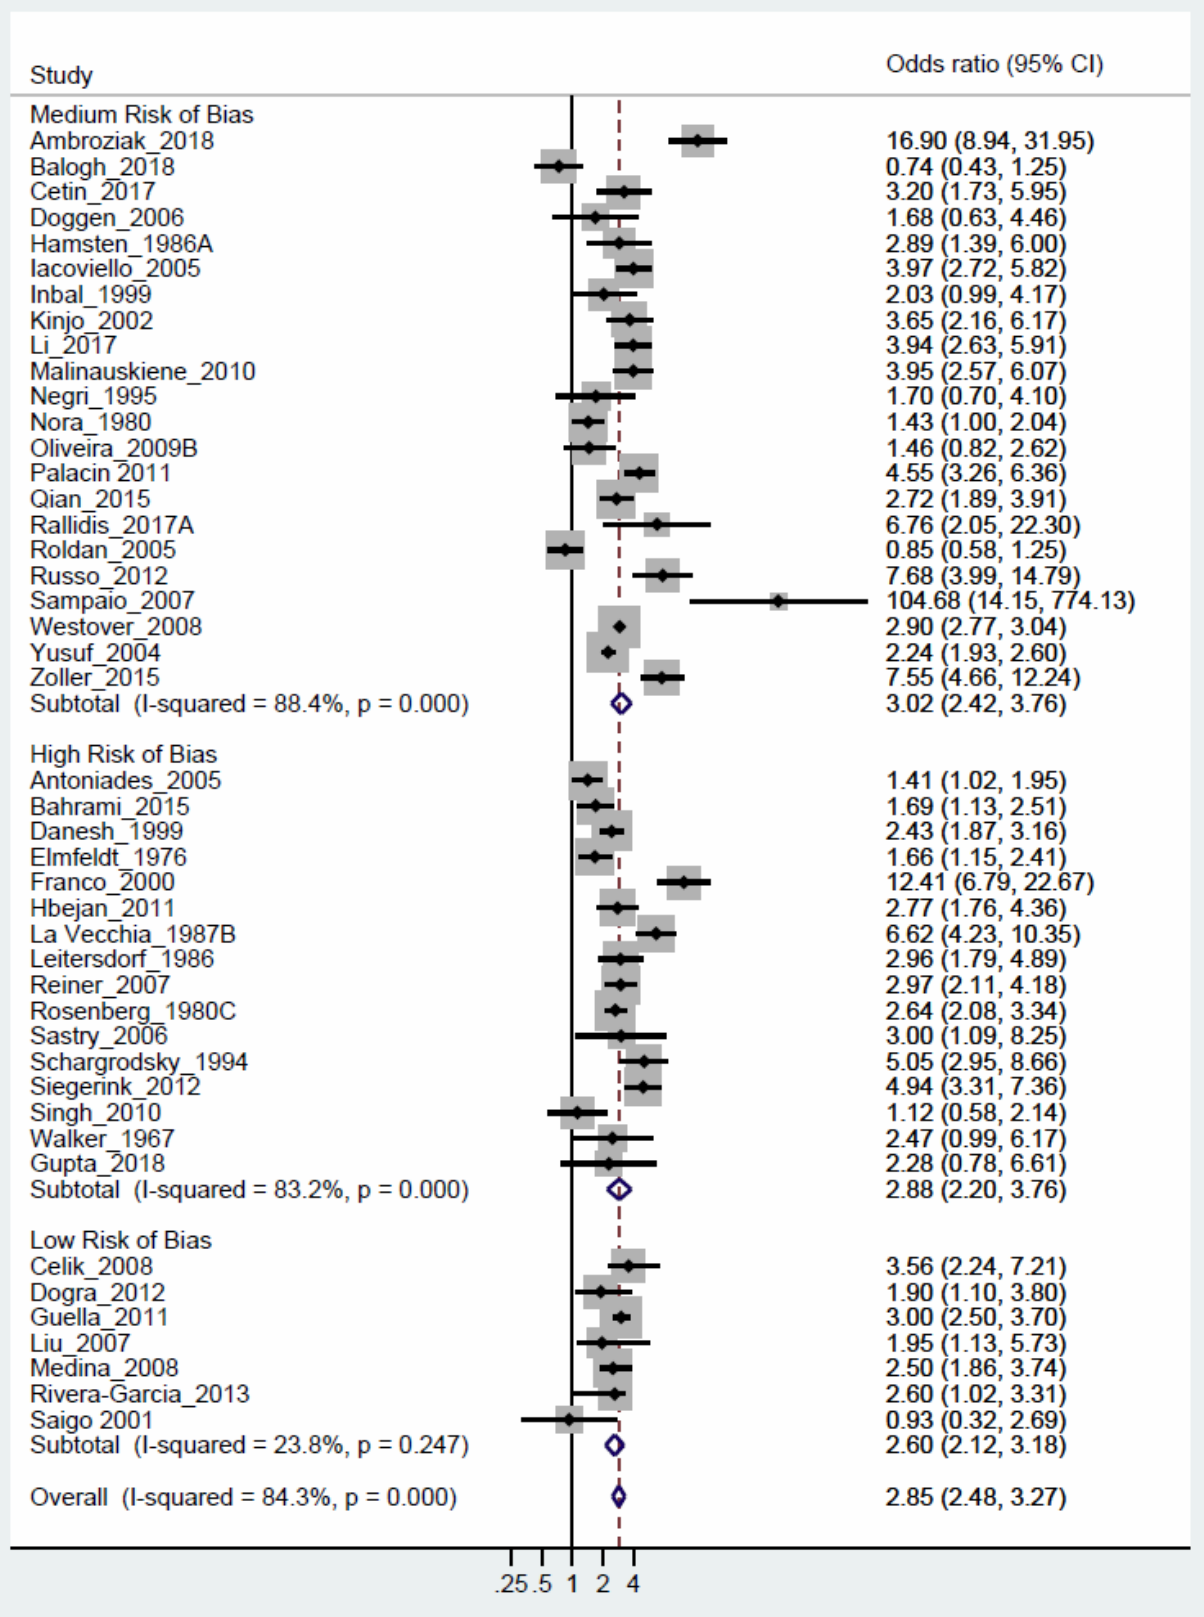

Abbreviations: CI: confidence interval; MI: myocardial infarction

### Supplemental Figure 9: BMI $\geq 30\text{kg/m}^2$ versus $<30\text{kg/m}^2$ and risk of premature MI

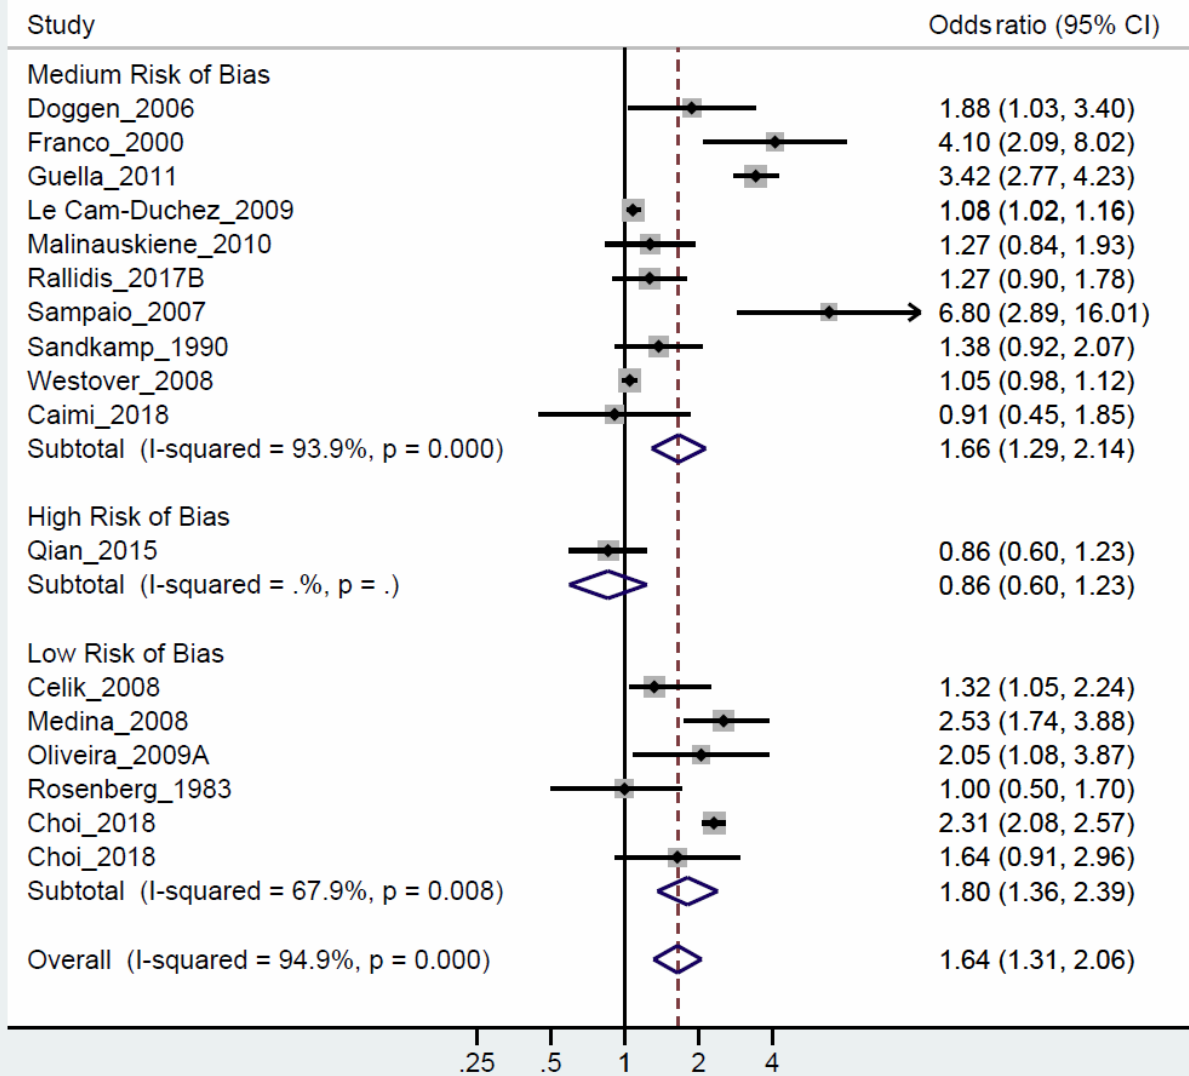

Abbreviations: BMI: body-mass index; CI: confidence interval; MI: myocardial infarction

**Supplemental Figure 10: BMI  $\geq 25\text{kg/m}^2$  versus  $<25\text{kg/m}^2$  and risk of premature MI**

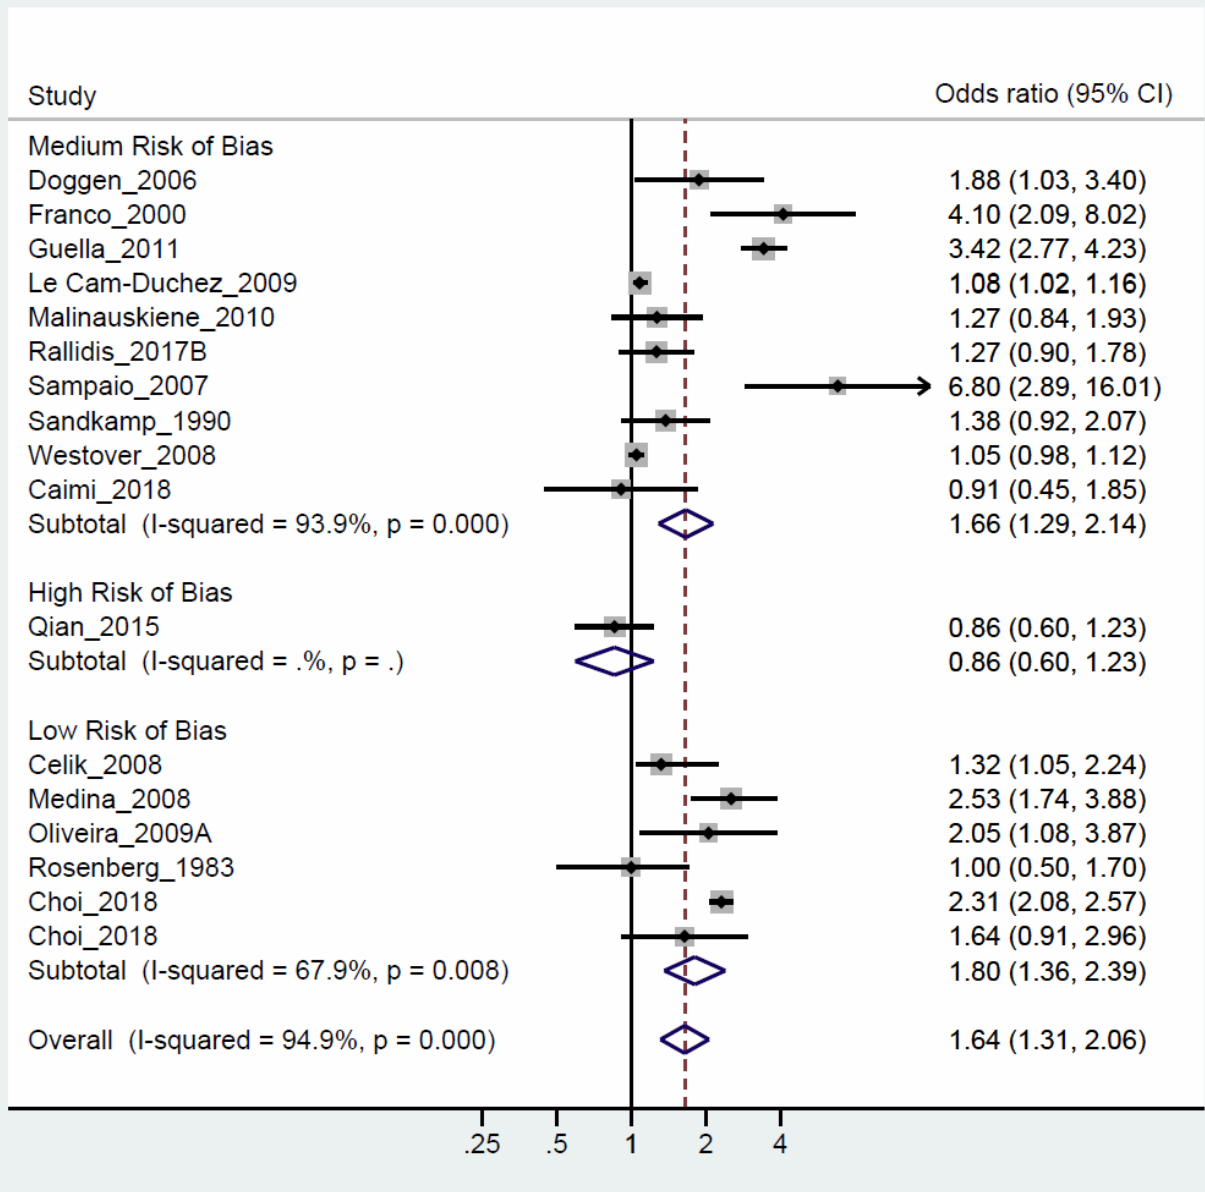

Abbreviations: BMI: body-mass index; CI: confidence interval; MI: myocardial infarction

### Supplemental Figure 11: Dyslipidemia (not specified) and risk of premature MI

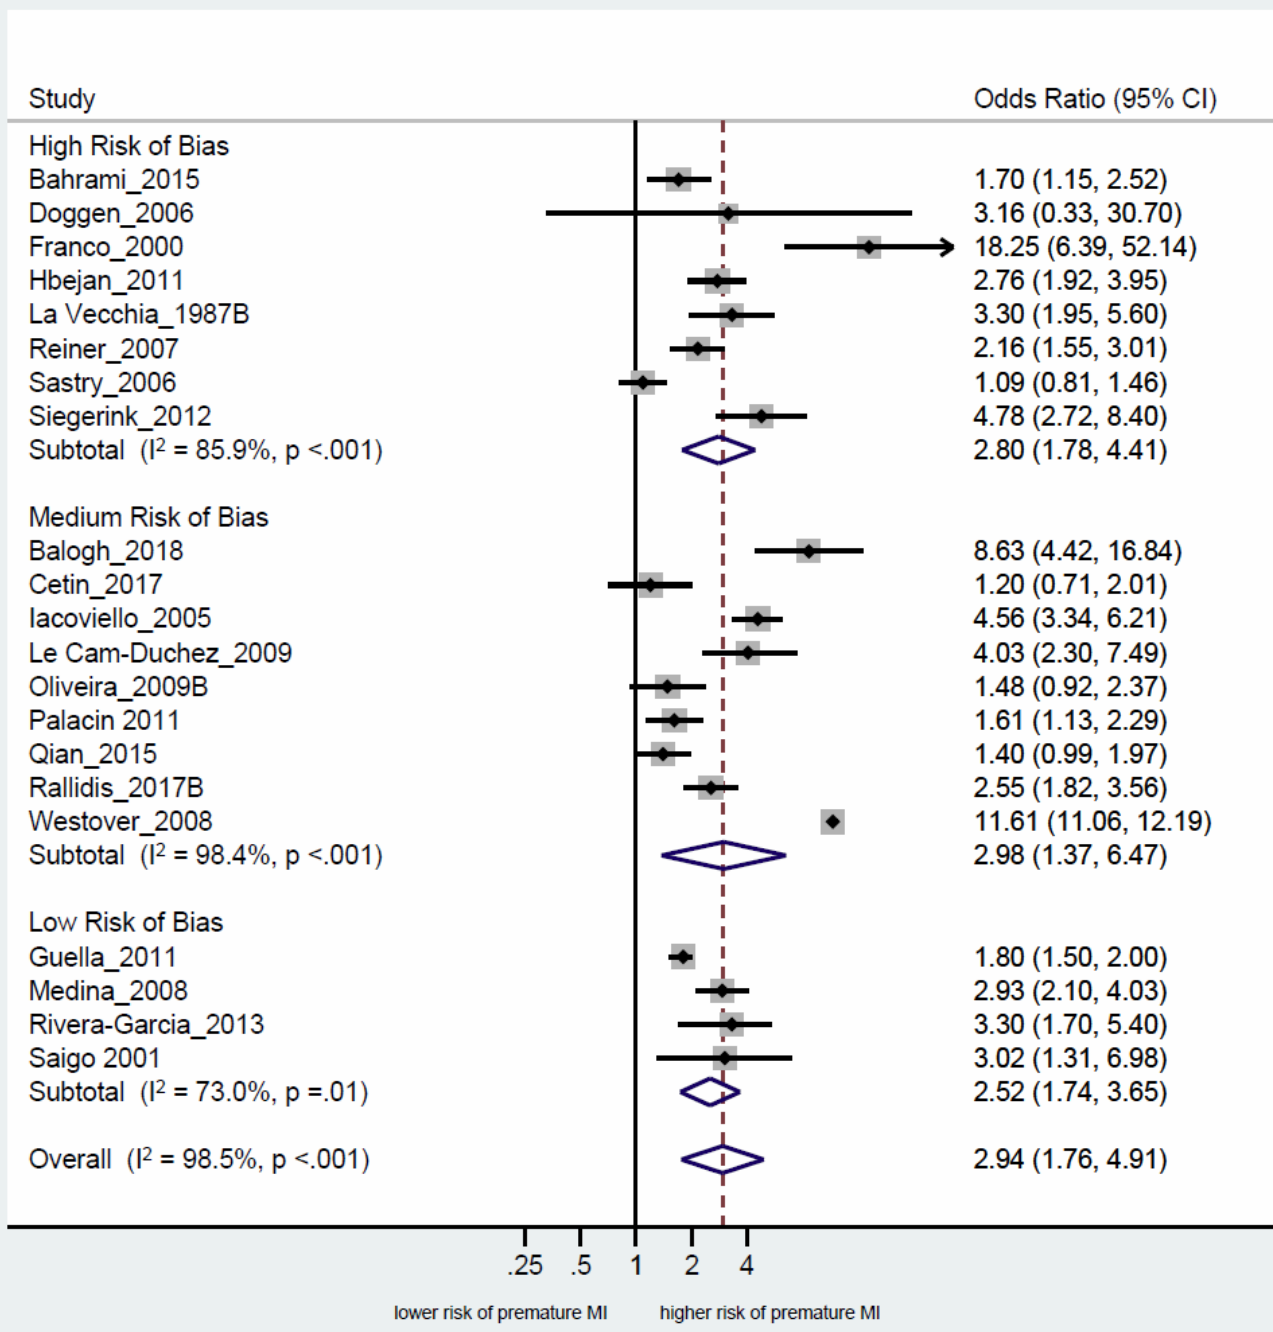

Abbreviations: CI: confidence interval; MI: myocardial infarction

**Supplemental Figure 12: Total cholesterol >200 mg/dL and risk of premature MI**

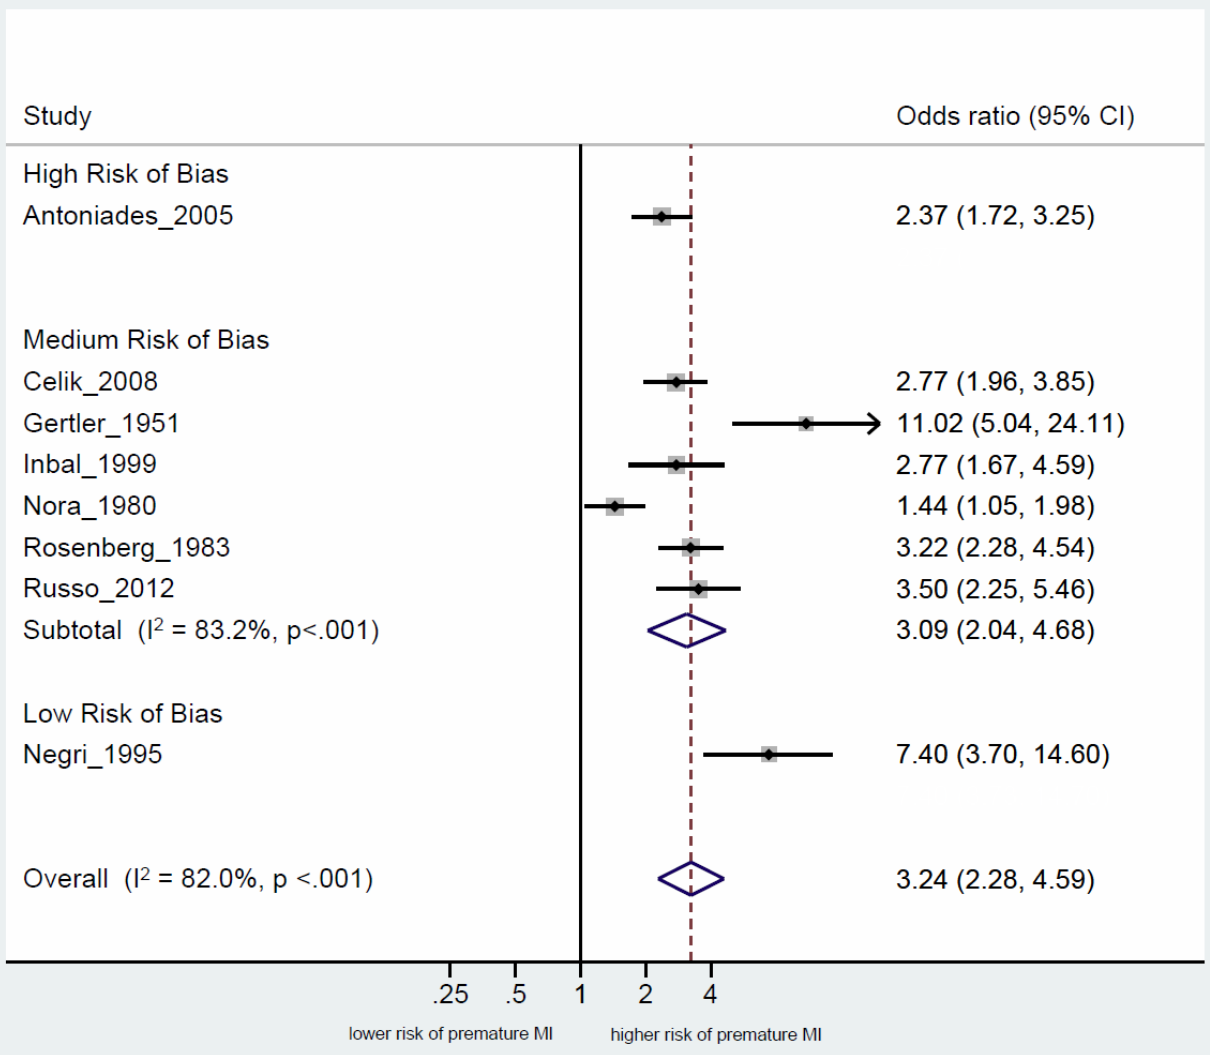

Abbreviations: CI: confidence interval; MI: myocardial infarction



**Supplemental Table 12: HDL cholesterol <60 mg/dL and risk of premature MI**

|                               | <b>Reference</b>              | <b>Risk of Bias</b> | <b>Odds ratio (95% CI)</b> |
|-------------------------------|-------------------------------|---------------------|----------------------------|
|                               | Rosenberg_1983 <sup>120</sup> | Medium              | 2.92 (1.70–5.00)           |
|                               | Celik_2008 <sup>73</sup>      | Medium              | 2.99 (1.87–4.24)           |
| Overall risk estimate         |                               |                     | 2.96 (2.14–4.11)           |
| I <sup>2</sup> value; p-value |                               |                     | 0%; p=.94                  |

CI: confidence interval; MI: myocardial infarction

### Supplemental Figure 13: High LDL cholesterol (not specified) and risk of premature MI

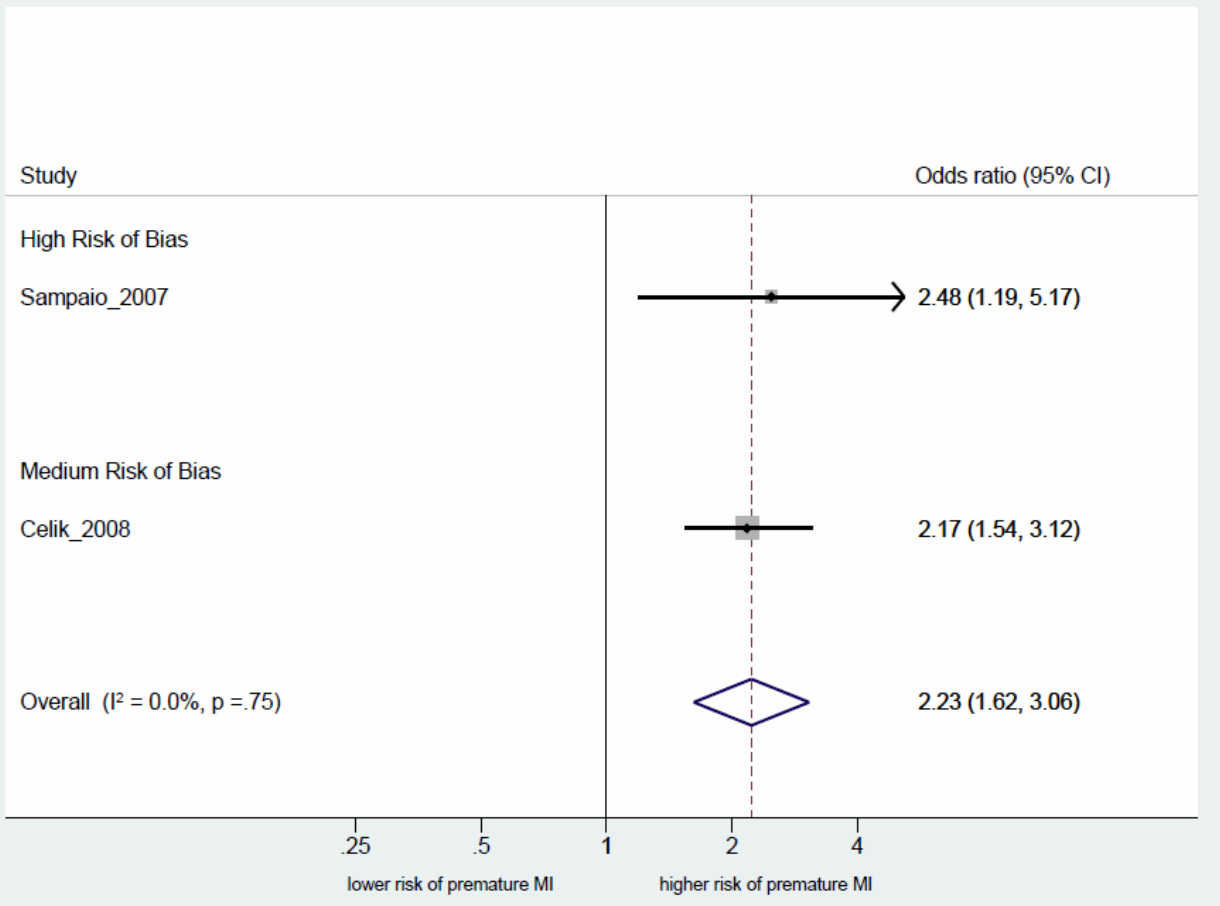

Abbreviations: CI: confidence interval; LDL: low-density lipoprotein; MI: myocardial infarction

### Supplemental Figure 14: Triglycerides >150 mg/dL and risk of premature MI

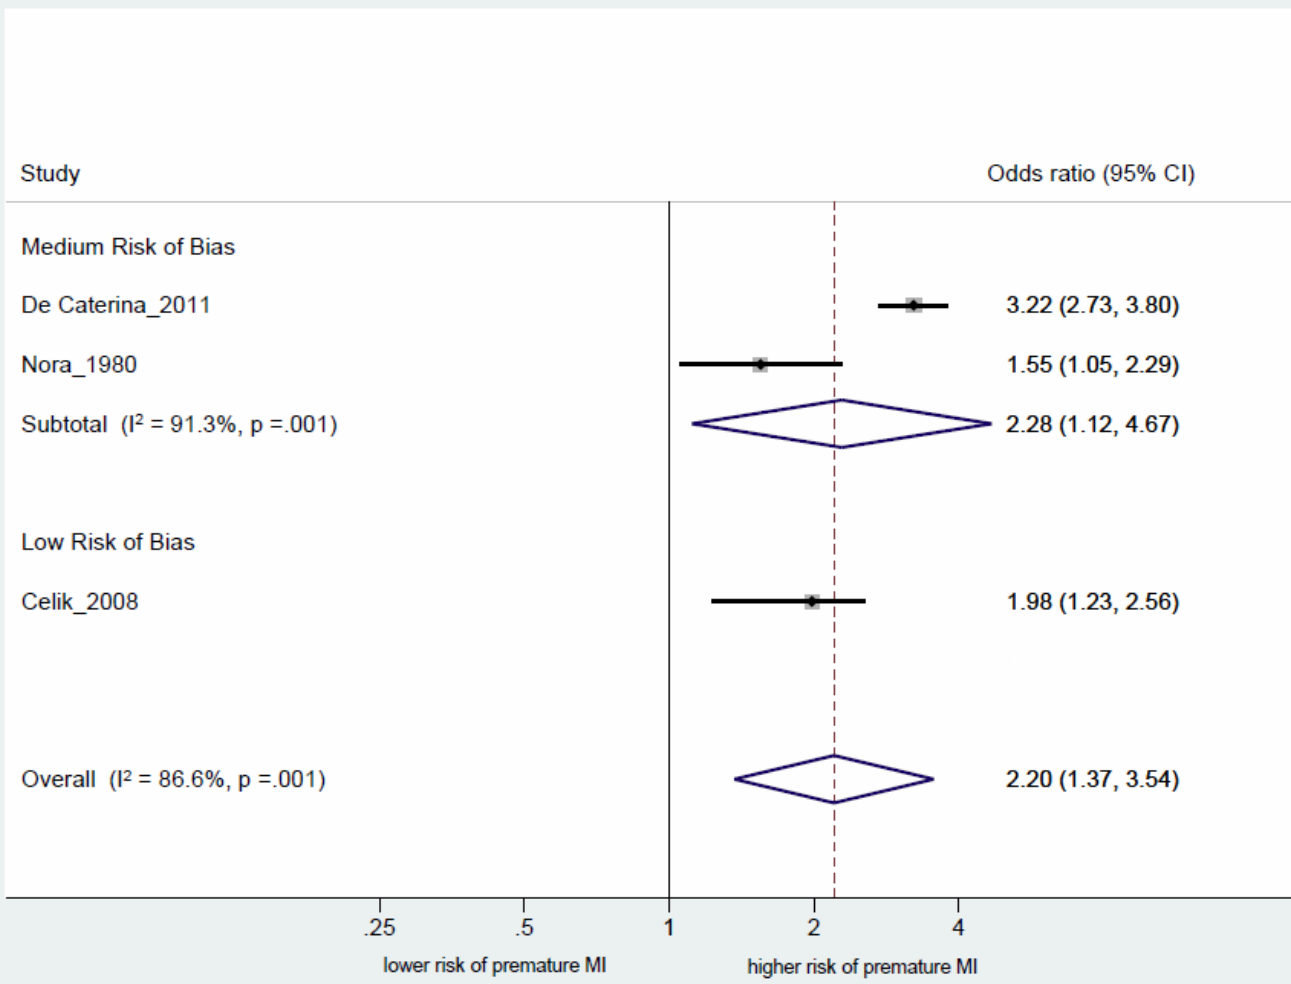

Abbreviations: CI: confidence interval; MI: myocardial infarction

**Supplemental Table 13: Lipids (per SD increment) and risk of premature MI**

| Risk factor                   | Reference                    | Age category (years) | Risk of Bias | Odds ratio (95% CI) per SD increment |
|-------------------------------|------------------------------|----------------------|--------------|--------------------------------------|
| LDL cholesterol               | Sniderman_2016 <sup>33</sup> | age <40              | Low          | 1.38 (1.23–1.55)                     |
|                               |                              | 40≤ age <50          | Low          | 1.55 (1.44–1.57)                     |
| Overall risk estimate         |                              |                      |              | 1.48 (1.32–1.65)                     |
| I <sup>2</sup> value; p-value |                              |                      |              | 63.6%; p=.10                         |
| HDL cholesterol               | Sniderman_2016 <sup>33</sup> | age <40              | Low          | 0.87 (0.76–0.99)                     |
|                               |                              | 40≤ age <50          | Low          | 0.87 (0.80–0.94)                     |
| Overall risk estimate         |                              |                      |              | 0.87 (0.81–0.93)                     |
| I <sup>2</sup> value; p-value |                              |                      |              | 0%; p=1.0                            |
| Non-HDL cholesterol           | Sniderman_2016 <sup>33</sup> | age <40              | Low          | 1.32 (1.18–1.48)                     |
|                               |                              | 40≤ age <50          | Low          | 1.47 (1.37–1.58)                     |
| Overall risk estimate         |                              |                      |              | 1.41 (1.27–1.56)                     |
| I <sup>2</sup> value; p-value |                              |                      |              | 59.7%; p=.12                         |
| Apolipoprotein A1             | Sniderman_2016 <sup>33</sup> | age <40              | Low          | 0.70 (0.64–0.75)                     |
|                               |                              | 40≤ age <50          | Low          | 0.66 (0.57–0.76)                     |
| Overall risk estimate         |                              |                      |              | 0.69 (0.64–0.74)                     |
| I <sup>2</sup> value; p-value |                              |                      |              | 0%; p=.48                            |
| Apolipoprotein B              | Sniderman_2016 <sup>33</sup> | age <40              | Low          | 1.62 (1.51–1.74)                     |
|                               |                              | 40≤ age <50          | Low          | 1.51 (1.34–1.70)                     |
| Overall risk estimate         |                              |                      |              | 1.59 (1.50–1.69)                     |
| I <sup>2</sup> value; p-value |                              |                      |              | 0%; p=.32                            |

CI: confidence interval; HDL: high-density lipoprotein; LDL: low-density lipoprotein; MI: myocardial infarction; SD: standard deviation

**Supplemental Table 14: Lipids and risk of premature MI**

| <b>Risk factor</b> | <b>Reference</b>       | <b>Risk of Bias</b> | <b>Hazard ratio (95% CI)<br/>top vs. lowest quartile</b> |
|--------------------|------------------------|---------------------|----------------------------------------------------------|
| Total cholesterol  | Lee_2020 <sup>34</sup> | Medium              | 2.01 (1.97–2.22)                                         |
| HDL cholesterol    | Lee_2020 <sup>34</sup> | Medium              | 0.49 (0.46–0.52)                                         |
| LDL cholesterol    | Lee_2020 <sup>34</sup> | Medium              | 1.47 (1.38–1.56)                                         |
| Triglycerides      | Lee_2020 <sup>34</sup> | Medium              | 2.48 (2.33–2.64)                                         |

CI: confidence interval; HDL: high-density lipoprotein; LDL: low-density lipoprotein; MI: myocardial infarction;

**Supplemental Table 15: Biomarkers and risk of premature MI, categorized by sex**

| <b>Risk factor</b>                             | <b>Reference</b>         | <b>Men</b>       | <b>Reference</b>              | <b>Women</b>     |
|------------------------------------------------|--------------------------|------------------|-------------------------------|------------------|
| Total cholesterol >200 mg/dL versus ≤200 mg/dL | Inbal_1999 <sup>91</sup> | 2.77 (1.67–4.59) | Rosenberg_1983 <sup>120</sup> | 3.22 (2.28–4.54) |
| HDL cholesterol <60 mg/dL versus ≥60 mg/dL     |                          |                  | Rosenberg_1983 <sup>120</sup> | 2.92 (1.70–5.00) |
| HDL/total cholesterol ratio, per 0.1 drop      |                          |                  | Montes_2005 <sup>32</sup>     | 1.40 (0.90–2.20) |
| CRP 0.5–1.34 mg/L versus <0.5 mg/L             |                          |                  | Tanis_2006 <sup>131</sup>     | 0.50 (0.27–0.91) |
| CRP 1.34–4.97 mg/L versus <0.5 mg/L            |                          |                  | Tanis_2006 <sup>131</sup>     | 0.80 (0.46–1.39) |
| CRP ≥4.9 mg/L versus <0.5 mg/L                 |                          |                  | Tanis_2006 <sup>131</sup>     | 1.00 (0.51–1.95) |

Abbreviations: CRP: C-reactive protein; HDL: high-density lipoprotein; MI: myocardial infarction
